# Supplementary material for: Responses to concerns about child maltreatment: a qualitative study of GPs in England
Source: PubMed Central journal article supplement (PMC3855649; doi:10.1136/bmjopen-2013-003894), 2013-12-03
Supplement: bmjopen-2013-003894.draft_revisions.pdf [file bmjopen-2013-003894.draft_revisions.pdf]

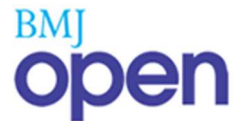

**Responses to concerns about child maltreatment: a  
qualitative study of GPs in England**

|                                 |                                                                                                                                                                                                                                                                                                                                                                                                                                                            |
|---------------------------------|------------------------------------------------------------------------------------------------------------------------------------------------------------------------------------------------------------------------------------------------------------------------------------------------------------------------------------------------------------------------------------------------------------------------------------------------------------|
| Journal:                        | <i>BMJ Open</i>                                                                                                                                                                                                                                                                                                                                                                                                                                            |
| Manuscript ID:                  | bmjopen-2013-003894                                                                                                                                                                                                                                                                                                                                                                                                                                        |
| Article Type:                   | Research                                                                                                                                                                                                                                                                                                                                                                                                                                                   |
| Date Submitted by the Author:   | 26-Aug-2013                                                                                                                                                                                                                                                                                                                                                                                                                                                |
| Complete List of Authors:       | Woodman, Jenny; UCL-Institute of Child Health, Department of Paediatric Epidemiology and Biostatistics<br>Gilbert, Ruth; UCL-Institute of Child Health, Department of Paediatric Epidemiology and Biostatistics<br>Allister, Janice; Royal College of General Practitioners,<br>Glaser, Danya; Great Ormond Street Hospital for Children NHS Foundation Trust,<br>Brandon, Marian; University of East Anglia, Centre for Research on Children and Families |
| <b>Primary Subject Heading</b>: | Paediatrics                                                                                                                                                                                                                                                                                                                                                                                                                                                |
| Secondary Subject Heading:      | Health services research, Paediatrics, Public health, Qualitative research                                                                                                                                                                                                                                                                                                                                                                                 |
| Keywords:                       | Child protection < PAEDIATRICS, PRIMARY CARE, PUBLIC HEALTH, QUALITATIVE RESEARCH                                                                                                                                                                                                                                                                                                                                                                          |
|                                 |                                                                                                                                                                                                                                                                                                                                                                                                                                                            |

SCHOLARONE™  
Manuscripts

Only

1  
2  
3 **Responses to concerns about child maltreatment: a qualitative study of GPs**  
4 **in England**  
5  
6

7 Jenny Woodman, Ruth Gilbert, Janice Allister, Danya Glaser, Marian Brandon  
8  
9

10 MRC Centre of Epidemiology for Child Health, UCL-Institute of Child Health,  
11 London WC1N 1EH  
12 Research student  
13

14 MRC Centre of Epidemiology for Child Health, UCL-Institute of Child Health,  
15 London WC1N 1EH  
16 Professor of Clinical Epidemiology  
17  
18

19 Royal College of General Practitioners, 30 Euston Square, London, NW1 2FB  
20 Child Health Representative  
21  
22

23 Great Ormond Street Hospital for Children NHS Foundation Trust London  
24 WC1N 3JH  
25 Hon Consultant Child and Adolescent Psychiatrist  
26  
27

28 Centre for Research on Children and Families, Elizabeth Fry Building,  
29 University of East Anglia, Norwich, NR4 7TJ  
30 Professor of Social Work  
31  
32

33  
34 Correspondence to: Jenny Woodman [j.woodman@ucl.ac.uk](mailto:j.woodman@ucl.ac.uk) or  
35 [jenny.woodman@gmail.com](mailto:jenny.woodman@gmail.com)  
36  
37  
38  
39  
40  
41  
42  
43  
44  
45  
46  
47  
48  
49  
50  
51  
52  
53  
54  
55  
56  
57  
58  
59  
60

1  
2  
3 **Key words:** child maltreatment, primary care, GP, responses, qualitative  
4

5 **ABSTRACT**  
6

7 **Objectives:** To provide a rich description of current responses to maltreatment-  
8 related concerns among a small sample of English GPs.  
9

10  
11  
12 **Design:** In-depth, face-to-face interviews between November 2010 and September  
13 2011. Participants selected and discussed families who had prompted “maltreatment-  
14 related concerns”. Robust thematic analysis of data.  
15  
16

17  
18  
19 **Setting:** 4 General Practices in England.  
20

21  
22 **Participants:** 14 GPs, 2 practice nurses and 2 health visitors from practices with at least  
23 one ‘expert’ GP.  
24

25  
26 **Results:** Concerns about neglect and emotional abuse dominated the interviews. GPs  
27 described intense and long-term involvement with families with multiple social and  
28 medical problems. Narratives were distilled into seven possible actions that GPs took  
29 in response to maltreatment-related concerns. These were orientated towards whole  
30 families (monitoring and advocating), the parents (coaching), and children (opportune  
31 healthcare), and included referral to or working with other services and recording  
32 concerns. Facilitators of the seven actions were trusting relationships between GP and  
33 parents, good working relationships with health visitors and framing the problem and  
34 the response as “medical”. The narratives indicated significant investment of time and  
35 energy in building facilitating relationships with parents with the aim of improving the  
36 well-being of the child.  
37  
38  
39  
40  
41  
42  
43  
44

45  
46  
47 **Conclusions:** The GPs in this sample were using their core activities and skills to  
48 manage families who prompted concerns about neglect and emotional abuse. If policy  
49 makers are serious about GPs responding to concerns about abuse and neglect, they  
50 should build on and evaluate the effectiveness of exemplars of current practice. The  
51 seven actions we identified could form the basis for the “lead professional” role in  
52 General Practice.  
53  
54  
55  
56  
57  
58  
59  
60

## STUDY SUMMARY

### Article focus

- We aimed to generate hypotheses about how GPs in England might feasibly respond to maltreatment-related concerns in children and families.
- We were interested in a range of responses including, but not limited to, referral to children's social care.

### Key messages

- This study identified seven actions in response to maltreatment-related concerns. These actions reflect core skills and activities of General Practice but might only be feasible for a subset of help-seeking families with possible neglect.
- Robust therapeutic relationships with families and working relationships with health visitors were identified as necessary facilitators of these actions.
- Potential benefits and harms of these responses were identified by participants. These responses need to be properly evaluated for their impact on children and families.

### Strengths / limitations

- This study generated hypotheses about responses that were feasible in English practices with some expertise and interest.
- Participant accounts were detailed and candid and findings resonate with other research in General Practice settings.
- Results cannot be generalised to all General Practices in England and the responses we identified need to be robustly evaluated for benefit and harms to children and their families.

## INTRODUCTION

Child maltreatment (abuse or neglect) is common, affecting at least 4% of all children in England each year.<sup>1,2</sup> All healthcare professionals have a statutory duty to protect children from child maltreatment.<sup>3</sup> GPs are uniquely placed to respond because they offer services to the whole family often over many years, manage parental problems that put children at risk of child maltreatment, such as mental health and substance misuse<sup>4</sup> and are skilled in fostering relationships, which constitute an important element of social welfare interventions. Although identification could undoubtedly be improved, GPs in England already record maltreatment-related problems in at least 1% of all children registered with them.<sup>5</sup> The true figure for children who raise concerns for GPs is likely to be far higher.<sup>6</sup>

There is a lack of clarity about what GPs should be doing for these large numbers of children who raise concerns, a large proportion of whom do not meet the high thresholds for intervention by children's social care. Good practice guidelines focus on referral pathways : GPs should record and monitor concerns, gather information, discuss with colleagues, hold team meetings and, where thresholds are met, refer the family to children's social care.<sup>7,8</sup> However, new (2013) statutory guidance envisages GPs taking a "lead" role for some children below the threshold for children's social care intervention, involving supporting the family, acting as an advocate and coordinating support services.<sup>3</sup> We currently lack any detailed understanding of how GPs might put these or other possible responses into practice.

To develop an understanding of what might comprise best practice for GPs we conducted an in-depth qualitative study to investigate how a small sample of GPs in England understand and respond to child maltreatment-related concerns in their daily practice.

## METHODS

One researcher conducted in-depth individual interviews with 14 GPs, two practice nurses and two health visitors from four GP practices in England. The practices were recruited from a larger convenience sample of practices already known to the research team.<sup>6</sup> This paper focuses largely on data from the GP interviews. The four practices were chosen to include geographical spread and to represent the highest child protection expertise within the sample. Expertise was defined as having at least one GP who was an 'expert' (a named doctor for child protection or a GP who had delivered child protection training, contributed to relevant policy or who considered themselves to have an extended interest in this area) and regular discussion of child protection concerns at clinical meetings. Participants were recruited through a lead 'expert' GP and researcher visits to the practices.

In the interviews, the researcher elicited narratives by asking participants to choose two or three "children, young people or families who had prompted maltreatment-related concerns" and describe their concerns and involvement. We did not specify whether participants should choose children already known to and working with children's social care or whether the concern should be current or historical. Our study design allowed for families to be discussed by two or more participants from the same practice and each expert GP spoke to colleagues to clarify whether this had been the case. Interviews were free-ranging with minimal steering from the researcher.

Interviews were face-to-face, conducted between November 2010 and September 2011, lasted an average of 50 minutes and were audio-recorded and later transcribed.

We used robust thematic analysis with an inductive and interpretive approach.<sup>9,10</sup> The exception to this was our a priori interest in whether and how GPs recorded concerns to inform our population-based analyses measuring GP practice.<sup>5</sup> Using NVivo software, we systematically assigned to each segment of interview transcript one or more concept labels (open coding). We made constant comparisons of codes within and between interviews to generate more abstract themes and build up an understanding of the relationships between them. We tested this emerging theory by paying particular attention to data that did not fit and using reflections on these instances to refine our analysis. We sought participant views on our preliminary results

1  
2  
3 via an e-leaflet. Seven participants (five GPs) responded, including at least one from  
4 each data collection site. This feedback was incorporated into the final interpretation.  
5  
6 One researcher conducted the coding and analysis with support from a senior  
7  
8 researcher who independently coded two transcripts and probed and questioned  
9  
10 interpretation throughout the study.  
11  
12  
13  
14  
15  
16  
17  
18  
19  
20  
21  
22  
23  
24  
25  
26  
27  
28  
29  
30  
31  
32  
33  
34  
35  
36  
37  
38  
39  
40  
41  
42  
43  
44  
45  
46  
47  
48  
49  
50  
51  
52  
53  
54  
55  
56  
57  
58  
59  
60

## RESULTS

The GP participants tended to be experienced professionals (average 19y since qualification; range 5-40y) who had worked for long periods within their current practice (average 10y; range 6m-23y). The GPs discussed 26 different families (range 1-3 families per participant). Only two families were discussed by more than one GP.

The data generated themes which we grouped as answers to three overarching questions: To **whom** were the GPs responding? What **actions** did they describe taking? What were the important **facilitators or barriers** for these actions?

### To whom

The GP narratives about families could be categorised into four broad types, which we named using quotes from the interviews:

1. **“stable at this point in time but it’s a never ending story”**: narratives describing families with previous very serious child protection concerns who had since achieved a fragile stability that participants perceived to require extra vigilance on their behalf. Current concerns were about neglect and emotional abuse.
2. **“on the edge”**: narratives describing families who were barely coping and perceived as liable to tip over the edge at any moment. Concerns were about neglect and, to a lesser degree, emotional abuse.
3. **“was it, wasn’t it”**: narratives describing situations where participants had a high degree of uncertainty as to whether physical or sexual abuse had taken place and where much time was spent trying to establish whether the suspected abuse was likely to have occurred.
4. **“fairly straightforward”**: uniformly brief narratives in which there was high certainty about physical or sexual abuse and decisive onwards referrals.

“Stable at this point” and “on the edge” families were discussed with the highest frequency (see Table 1) and occupied most talk-time. For these families, participants could give a high level of detail about multiple family members, often reaching back



1  
2  
3 many years. These two family types prompted concerns about neglect and emotional  
4 abuse and it was these concerns that dominated the interviews:  
5  
6

7 “Neglect really. I think with chaotic lifestyles that the child may become... well  
8 just not be cared for adequately. [...] Parents who become impoverished  
9 because of their drug using behaviour are at just that much more risk of  
10 physical neglect of not feeding the child, not caring for the child, not changing  
11 its nappy, of not... and to an extent emotional neglect as well, just that there’s  
12 not enough parenting input.”  
13  
14  
15  
16  
17

18 (Participant 14; 7 month old baby)  
19

20  
21 “I’m not worried about the children whether they will be abused physically, I’m  
22 worried about the emotional deprivation rather than... the neglect rather than  
23 the abuse.”  
24  
25  
26

27 (Participant 15, two children aged 9 and 11y)  
28  
29

30 For these two families, parental behaviour was commonly described in terms of “low  
31 parenting capacity”, “poor parenting” or “impoverished” parenting. Participants told  
32 how they were concerned that these parents failed to supervise their children  
33 adequately, transferred parenting responsibilities onto older siblings who were  
34 themselves young children, failed to set boundaries, routines or bedtimes, allowed  
35 children to miss school, did not adequately comply with essential medical care for their  
36 children and in some cases, might not be able to keep young children clean and fed.  
37  
38  
39  
40  
41  
42

43 “On the edge” and “stable at this point” families were described as being well known  
44 to children’s social care, either as child protection cases (“stable at this point”  
45 families) or child in need cases (“on the edge” families; see Table 1). It was often  
46 unclear as to whether “stable at this point” families had *current* contact with child  
47 protection services and this was not probed by the interviewer. It was not clear  
48 whether the narratives about “was it, wasn’t it?” or “straightforward” families were  
49 known to children’s social care prior to the General Practice referral.  
50  
51  
52  
53  
54  
55  
56  
57  
58  
59  
60

1  
2  
3  
4  
5  
6  
7  
8  
9  
10  
11  
12  
13  
14  
15  
16  
17  
18  
19  
20  
21  
22  
23  
24  
25  
26  
27  
28  
29  
30  
31  
32  
33  
34  
35  
36  
37  
38  
39  
40  
41  
42  
43  
44  
45  
46  
47  
48  
49

**Table 1: Whom (typology of narratives about families)?**

*It important to remember that these typologies of families only tell us about GP perspectives and understandings and cannot be relied on as accurate data about families.*

| “Stable at this point in time but it’s a never ending story”                                                                                                                                                                                                                                                                                                                                                                                                                                                                                                                                                                                                                                                                                                                                           | “On the edge”                                                                                                                                                                                                                                                                                                                                                                                                                                                                                                                                                                                                                                                                                                                                                                                                                 | “Was it, wasn’t it?”                                                                                                                                                                                                                                                                                                                                                                                                                                                                                                                                                                                                                                                                                                                                                                                         | “Fairly straightforward”                                                                                                                                                                                                                                                                                                                                                                                                                                                                                                                                                                                                                             |
|--------------------------------------------------------------------------------------------------------------------------------------------------------------------------------------------------------------------------------------------------------------------------------------------------------------------------------------------------------------------------------------------------------------------------------------------------------------------------------------------------------------------------------------------------------------------------------------------------------------------------------------------------------------------------------------------------------------------------------------------------------------------------------------------------------|-------------------------------------------------------------------------------------------------------------------------------------------------------------------------------------------------------------------------------------------------------------------------------------------------------------------------------------------------------------------------------------------------------------------------------------------------------------------------------------------------------------------------------------------------------------------------------------------------------------------------------------------------------------------------------------------------------------------------------------------------------------------------------------------------------------------------------|--------------------------------------------------------------------------------------------------------------------------------------------------------------------------------------------------------------------------------------------------------------------------------------------------------------------------------------------------------------------------------------------------------------------------------------------------------------------------------------------------------------------------------------------------------------------------------------------------------------------------------------------------------------------------------------------------------------------------------------------------------------------------------------------------------------|------------------------------------------------------------------------------------------------------------------------------------------------------------------------------------------------------------------------------------------------------------------------------------------------------------------------------------------------------------------------------------------------------------------------------------------------------------------------------------------------------------------------------------------------------------------------------------------------------------------------------------------------------|
| <p>Most common narrative N=16*</p> <ul style="list-style-type: none"> <li>• Very serious and long-term parent drug/alcohol use, mental health problems and domestic violence</li> <li>• Extensive contact with CSC** child protection services, police and drugs and alcohol services</li> <li>• Siblings taken into care or died</li> <li>• Concerns about physical neglect and emotional abuse</li> <li>• Circumstances seen to have recently improved for children</li> <li>• Participants felt hopeful about capacity to parent in the future</li> <li>• But new stability was seen as fragile and optimism about future was cautious and uneasy</li> <li>• Perceived need for continued vigilance to spot relapses (further neglect / emotional abuse) and prevent poor child outcomes</li> </ul> | <p>Second most common narrative N=12*</p> <ul style="list-style-type: none"> <li>• Lack of boundaries for children; poor school attendance, missed medical appointments, concerns about nutrition and clothing</li> <li>• Families suffered from: unemployment; inadequate housing; poverty; parental alcohol use or mental health problems; and overwhelming physical health and behavioural problems</li> <li>• Concerns about neglect and emotion abuse</li> <li>• Accounts of intermittent and inadequate involvement from child protection services</li> <li>• Children described as ‘vulnerable’ and often as currently involved with CSC** as a child in need</li> <li>• Problems experienced by GPs as overwhelming and frustrating.</li> <li>• Worry about families “tipping over the edge” at any moment</li> </ul> | <p>Third most common narrative N=9*</p> <ul style="list-style-type: none"> <li>• Concerns focussed on possible physical or sexual abuse</li> <li>• Participants were very uncertain whether suspicions “amounted to anything or not” and believed that physical or sexual abuse probably had not occurred</li> <li>• They described having just enough concern to take further action</li> <li>• After varying amounts of time (from a few days to over a year), participants reached the decision, usually in conjunction with CSC**, that the child was <i>not</i> likely to have been physically or sexually abused.</li> <li>• However, in the four stories of injured children, participants told the researcher that there were on-going concerns about parental supervision (i.e. neglect)</li> </ul> | <p>Least common narrative N=3*</p> <ul style="list-style-type: none"> <li>• These narratives were characterised by concerns about maltreatment described as “obvious” or “barn door” with a high level of suspicion from participants and decisive referrals to CSC** or secondary health care</li> <li>• Narratives were characterised by participants believing that referral to social care or other agencies would result in appropriate and timely services</li> <li>• These cases were only mentioned in passing and usually as a contrast to one of the other family types, about whom participants talked in detail and at length</li> </ul> |

\* More narratives than families because some families had more than family classification as participant’s views of the family evolved over time. CSC\*\*=children’s social care

1  
2  
3 Narratives about “on the edge” families were typified by a belief that children’s social  
4 care did not recognise the seriousness of the situation for the children and were  
5 reluctant to offer the child protection services that the GP perceived they needed. In  
6 the accounts, “on the edge” families had historic and intermittent contact with child  
7 protection services (Table 1). “Was it, wasn’t it” narratives (Table 1) were also  
8 characterised by a belief that children’s social care were acting inappropriately –in this  
9 case, being too heavy handed when the GP “didn’t have a high level of concern that  
10 [the child] was being abused” (Participant 8, 8y old). See Table 1 for a detailed  
11 summary of all four types of family narrative.  
12  
13  
14  
15  
16  
17  
18  
19

### 20 **Actions**

21  
22 There were seven actions that the GPs described taking in response to maltreatment-  
23 related concerns.  
24

- 25 1. Monitoring concerns
  - 26 2. Advocating for families
  - 27 3. Coaching parents
  - 28 4. Providing opportune healthcare for children
  - 29 5. Referral to other services
  - 30 6. Working with other services
  - 31 7. Recording concerns
- 32  
33  
34  
35  
36  
37  
38  
39

40  
41 The definitions and descriptions of each of these seven actions are given in Table 2.  
42 Some of the actions were orientated towards whole families (monitoring and  
43 advocating), some towards the parents (coaching), some towards the children  
44 (opportune healthcare) and some towards other agencies (referral to and working with  
45 other services). As Table 2 summarises, the GPs were very aware that their  
46 management of maltreatment-related concerns relied on regular contact with families  
47 for non-maltreatment related reasons (monitoring and opportune healthcare), help-  
48 seeking behaviour and honest disclosure of problems from adult family members  
49 (monitoring and advocating), parental engagement with General Practice (coaching  
50  
51  
52  
53  
54  
55  
56  
57  
58  
59  
60

1  
2  
3 and advocating) and being able to offer services that parents wanted (monitoring and  
4 opportune healthcare).  
5  
6

7  
8 Referrals to other services and joint-working across services were discussed almost  
9 exclusively in relation to children's social care and paediatric services. GPs  
10 acknowledged their reliance on health visitors and GP colleagues for gathering further  
11 information (for monitoring) and, in the case of concerns about neglect, deciding  
12 whether to make referrals to children's social care. GPs told how they directly referred  
13 concerns about sexual or physical abuse to children's social care without consulting  
14 other primary care colleagues (Tables 1 and 2). GPs were conscious that they relied on  
15 regular meetings of the primary health care team in order to gather wider information  
16 about families from health visitors. Health visitors were also seen as a conduit for  
17 information about children's social care input with families. For cases perceived to be  
18 urgent, health visitors were accessed via telephone or in "corridor conversations",  
19 which were perceived to be few and far between following relocation of health visitors  
20 away from General Practice.  
21  
22  
23  
24  
25  
26  
27  
28  
29  
30  
31  
32  
33  
34  
35  
36  
37  
38  
39  
40  
41  
42  
43  
44  
45  
46  
47  
48  
49  
50  
51  
52  
53  
54  
55  
56  
57  
58  
59  
60

Table 2: Actions

| What                                                                                      | For whom*                                                                            | How                                                                                                                                                                                                                                                                                                                                                                                                                                                                                                                                                                                                                                                                                                                                                                                                                                                                                                                                                                                                                                                                                                                                                   | Why                                                                                                                                                                                                                                                                             | Context                                                                                                                                                                                                                                                                                                                                                                                                                                                                                                         |
|-------------------------------------------------------------------------------------------|--------------------------------------------------------------------------------------|-------------------------------------------------------------------------------------------------------------------------------------------------------------------------------------------------------------------------------------------------------------------------------------------------------------------------------------------------------------------------------------------------------------------------------------------------------------------------------------------------------------------------------------------------------------------------------------------------------------------------------------------------------------------------------------------------------------------------------------------------------------------------------------------------------------------------------------------------------------------------------------------------------------------------------------------------------------------------------------------------------------------------------------------------------------------------------------------------------------------------------------------------------|---------------------------------------------------------------------------------------------------------------------------------------------------------------------------------------------------------------------------------------------------------------------------------|-----------------------------------------------------------------------------------------------------------------------------------------------------------------------------------------------------------------------------------------------------------------------------------------------------------------------------------------------------------------------------------------------------------------------------------------------------------------------------------------------------------------|
| Monitoring:<br>keeping a “watchful eye”<br>on families and being “a<br>bit more vigilant” | Frequently<br>“stable at this<br>point”<br>occasionally<br>“on the edge”<br>families | <ul style="list-style-type: none"> <li>Using routine health-checks in children and regular consultations for health problems in parents to assess well-being of children and ‘coping’/risk factors in parents</li> <li>Receiving information about family life and parenting from other family members during consultations, esp. grandmothers</li> <li>Assessing the family and risk during (routine) GP post-natal home-visits</li> <li>Checking the electronic health records for subsequent presentations to colleagues.</li> <li>Interpreting missed appointments as a possible sign of escalating problems in the family. Usually this relied on the individual practitioner but one GP was developing a practice-wide system to capture all missed primary and secondary care appointments by &lt;16s</li> <li>Using primary care team meetings about child safeguarding to gather wider information, anticipate stressful or important points in a family’s life, such as the birth of a new baby or to gather wider information about a family. Health visitors were essential for these meetings to fulfil a monitoring function</li> </ul> | To ascertain whether or not there was relevant information that needed to be passed onto social care (in the form of a referral). Missed appointments could result in a phone call from the GP and, if necessary, a letter and/or discussion in the vulnerable families meeting | <p>When confident that the family would seek help and disclose honest information, GPs felt comfortable with the role of monitoring and risk assessment in “stable at this point” families. Honest disclosure and help-seeking behaviour in families relied on GPs being seen as a ‘trusted ally’</p> <p>Some GPs and the health visitors recognised that GP monitoring was limited due to ‘health’ focus without wider information. GPs relied heavily on health visitors to fulfil their monitoring role.</p> |

1  
2  
3  
4  
5  
6  
7  
8  
9  
10  
11  
12  
13  
14  
15  
16  
17  
18  
19  
20  
21  
22  
23  
24  
25  
26  
27  
28  
29  
30  
31  
32  
33  
34  
35  
36  
37  
38  
39  
40  
41  
42  
43  
44  
45  
46  
47  
48  
49

| What                                                                                                                           | For whom*                                                                                                        | How                                                                                                                                                                                                                                                                                                                                                                                                                                                                                                                                                                                 | Why                                                                                                                                                                                                                                                                                                                                                                                                                                                                                                         | Context                                                                                                                                                                                                                                                                                                         |
|--------------------------------------------------------------------------------------------------------------------------------|------------------------------------------------------------------------------------------------------------------|-------------------------------------------------------------------------------------------------------------------------------------------------------------------------------------------------------------------------------------------------------------------------------------------------------------------------------------------------------------------------------------------------------------------------------------------------------------------------------------------------------------------------------------------------------------------------------------|-------------------------------------------------------------------------------------------------------------------------------------------------------------------------------------------------------------------------------------------------------------------------------------------------------------------------------------------------------------------------------------------------------------------------------------------------------------------------------------------------------------|-----------------------------------------------------------------------------------------------------------------------------------------------------------------------------------------------------------------------------------------------------------------------------------------------------------------|
| <p>Advocating: “you’ve got to stand up and shout for people” (making a case to other agencies on the participant’s behalf)</p> | <p>Frequently “on the edge” and “was it, wasn’t it?” families. Occasionally “stable at this point” families.</p> | <ul style="list-style-type: none"> <li>Supporting requests for improved housing or benefits</li> <li>For “on the edge” families, interceding with social care to make this agency recognise the seriousness of the family’s problems and offer (what the GPs perceived to be) a more appropriate level of service (usually child protection services)</li> <li>For “was it, wasn’t it” families, interceding with social care to reduce an unnecessarily heavy-handed or insensitive approach and encouraging these families to demonstrate cooperation with social care</li> </ul> | <p>Improving quality of life (housing, poverty) was perceived as directly impacting on parenting and, by this route, on child welfare</p> <p>GPs saw many “on the edge” children as in need of protection ( and sometimes removal) in order to mitigate poor child outcomes</p> <p>By encouraging compliance, GPs aimed to avoid things “getting worse” for these families with an even more coercive approach from this agency and, instead, to help the family access supportive social care services</p> | <p>The need to intercede with social care was seen as greatest in the “on the edge” families whose children has suffered “terrible neglect” over years but where maltreatment did not pose an immediate threat to child’s physical safety and/or was not as “barn door” as some of the other types of abuse</p> |

| What                                                                                                                                              | For whom*                                | How                                                                                                                                                                                                                                                                                                                                                                                                         | Why                                                                                                                                                                                                                                                                                                                                  | Context                                                                                                                                                                                                                                                                                          |
|---------------------------------------------------------------------------------------------------------------------------------------------------|------------------------------------------|-------------------------------------------------------------------------------------------------------------------------------------------------------------------------------------------------------------------------------------------------------------------------------------------------------------------------------------------------------------------------------------------------------------|--------------------------------------------------------------------------------------------------------------------------------------------------------------------------------------------------------------------------------------------------------------------------------------------------------------------------------------|--------------------------------------------------------------------------------------------------------------------------------------------------------------------------------------------------------------------------------------------------------------------------------------------------|
| <p>Coaching: activating of parents by attempting to shift mind-set, take responsibility for their problems and, eventually, change behaviours</p> | <p>Frequently “on the edge” families</p> | <ul style="list-style-type: none"> <li>Talking to parents, usually the mother, to encourage them to “look at different ways of thinking about things”, such as realising “that there was actually a problem with the children” or that “stopping drinking was a good thing”</li> <li>Talking to parents, usually the mother, to encourage them to “change their life” or “change her behaviours”</li> </ul> | <p>A parent’s willingness or ability to recognise that there was a problem seemed to make the difference between situation perceived as hopeful and one perceived as hopeless for the family. Parental (maternal) recognition of the problem was seen as the first step in intervening to improve the situation for the children</p> | <p>This was described as a difficult task that was often attempted but infrequently achieved.</p> <p>In order to have a hope of changing parental mind-set (and eventually behaviour), GPs saw that the parents needed to be engaged with primary care and to see the GP as a ‘trusted ally’</p> |
| <p>Opportune healthcare: providing (missed) routine and preventive healthcare for children during consultations for other reasons</p>             | <p>Frequently “on the edge” families</p> | <ul style="list-style-type: none"> <li>Meeting preventive healthcare needs of the children during parent/child consultations for other reasons (e.g. overdue immunisations or developmental checks)</li> <li>This had to be done immediately as the parents could not be relied on to come back at a later date</li> </ul>                                                                                  |                                                                                                                                                                                                                                                                                                                                      | <p>Facilitated by being able to offer something that the family wanted (leverage) such as letters to support benefits claims and easy access to a willing health visitor</p>                                                                                                                     |

| What                                                                                                                                                                                                                                                          | For whom*                                                                                                                  | How                                                                                                                                                                                                                                                                                                                                              | Why                                                                                                            | Context                                                                                                                                                                                                                                                                                                                   |
|---------------------------------------------------------------------------------------------------------------------------------------------------------------------------------------------------------------------------------------------------------------|----------------------------------------------------------------------------------------------------------------------------|--------------------------------------------------------------------------------------------------------------------------------------------------------------------------------------------------------------------------------------------------------------------------------------------------------------------------------------------------|----------------------------------------------------------------------------------------------------------------|---------------------------------------------------------------------------------------------------------------------------------------------------------------------------------------------------------------------------------------------------------------------------------------------------------------------------|
| <p>Referral to other services</p> <p>Although there were mentions of referral to the police or to specialist child protection assessment clinics, these were rare. In contrast referral to children's social care and/or paediatric services were common.</p> | <p>Frequently "fairly straightforward" and "was it, wasn't it" families. Occasionally "stable at the moment" families.</p> | <p>Children's social care</p> <ul style="list-style-type: none"> <li>• Immediately, decisively and directly following consultation with a child or parent.</li> <li>• After using health visitor opinion or follow-up to confirm or counter GP concerns, sometimes via an additional filter of the safeguarding lead in the practice.</li> </ul> |                                                                                                                | <p>Direct referrals to social care involved certainty about physical abuse. For emotional abuse, neglect or highly uncertain physical abuse GPs used follow-up by health visitors to scale concerns up and meet thresholds for referral to children's social care or provide reassurance and decide against referral.</p> |
|                                                                                                                                                                                                                                                               | <p>"Was it, wasn't it" families</p>                                                                                        | <p>Paediatric services</p> <ul style="list-style-type: none"> <li>• Referral to hospital paediatricians for an assessment of injuries or symptoms which might be related to physical or sexual abuse.</li> <li>• Children referred to paediatric services were also simultaneously referred to children's social care by the GP.</li> </ul>      | <p>GPs sought a full assessment and documentation of child injuries or symptoms, including probable cause.</p> | <p>GPs recounted stories of how paediatrician behaviour could be insensitive to GP-family relationships and did not support or encourage future referrals.</p>                                                                                                                                                            |



Table 3: Comparison of our findings with study by Tompsett et al.<sup>11</sup>

| Four roles outlined by Tompsett et al*                                                                                                                                                                                                                                                                                          | Relevant findings from our study                                                                                                                                                                                                                                                                                                                          |                                                                                                                                                                                                                                                                                                                                                                                                                                                                                                                                                                                                                                                                                                                                                                                                                                                                                                                                                                                                                   |
|---------------------------------------------------------------------------------------------------------------------------------------------------------------------------------------------------------------------------------------------------------------------------------------------------------------------------------|-----------------------------------------------------------------------------------------------------------------------------------------------------------------------------------------------------------------------------------------------------------------------------------------------------------------------------------------------------------|-------------------------------------------------------------------------------------------------------------------------------------------------------------------------------------------------------------------------------------------------------------------------------------------------------------------------------------------------------------------------------------------------------------------------------------------------------------------------------------------------------------------------------------------------------------------------------------------------------------------------------------------------------------------------------------------------------------------------------------------------------------------------------------------------------------------------------------------------------------------------------------------------------------------------------------------------------------------------------------------------------------------|
|                                                                                                                                                                                                                                                                                                                                 | Similarities                                                                                                                                                                                                                                                                                                                                              | What our study adds                                                                                                                                                                                                                                                                                                                                                                                                                                                                                                                                                                                                                                                                                                                                                                                                                                                                                                                                                                                               |
| <p><b>1. The case holder:</b><br/>GP has on-going relationship with family before, during and after referral to children's social care. This role builds on voluntary disclosure and establishing trust over time with the parents. This role was clearly identified by GPs but not recognised so much by the stakeholders.</p> | <p>Comparable to the role that GPs in the sample described in relation to 'stable at this point', 'on the edge' and 'was it, wasn't it?' families, both in the on-going nature of the relationship with families and in the reliance on voluntary disclosure and trust by parents. This was the most commonly described role by the GPs in my sample.</p> | <p>This role might be performed most commonly where:</p> <ul style="list-style-type: none"> <li>• Families had multiple health problems (including those caused by child neglect) which: <ul style="list-style-type: none"> <li>○ Provided a reason for repeated contact</li> <li>○ Legitimised GP intervention in child safeguarding concerns</li> <li>○ Offered opportunity for establish trust and reciprocity and encourage help-seeking behaviours by meeting high need</li> </ul> </li> <li>• GPs perceived that social care was not/not likely to offer appropriate services</li> <li>• GPs could construct concerns as due to "incompetent" (rather than "malicious" parenting) which allowed sympathy with the parents and facilitated on-going GP involvement.</li> </ul> <p>These factors were typical of families who prompted concerns about chronic <i>neglect</i>.</p> <p>The 'case-holder' role also included monitoring, coaching, advocating and providing opportune preventive healthcare.</p> |

1  
2  
3  
4  
5  
6  
7  
8  
9  
10  
11  
12  
13  
14  
15  
16  
17  
18  
19  
20  
21  
22  
23  
24  
25  
26  
27  
28  
29  
30  
31  
32  
33  
34  
35  
36  
37  
38  
39  
40  
41  
42  
43  
44  
45  
46  
47  
48  
49

Table 3: Comparison of our findings with study by Tompsett et al.<sup>11</sup>

| Four roles outlined by Tompsett et al*                                                                                                                                                                                                                                                                                          | Relevant findings from our study                                                                                                                                                                                                                                                                                                                           |                                                                                                                                                                                                                                                                                                                                                                                                                                                                                                                                                                                                                                                                                                                                                                                                                                                                                                                                                                                                                       |
|---------------------------------------------------------------------------------------------------------------------------------------------------------------------------------------------------------------------------------------------------------------------------------------------------------------------------------|------------------------------------------------------------------------------------------------------------------------------------------------------------------------------------------------------------------------------------------------------------------------------------------------------------------------------------------------------------|-----------------------------------------------------------------------------------------------------------------------------------------------------------------------------------------------------------------------------------------------------------------------------------------------------------------------------------------------------------------------------------------------------------------------------------------------------------------------------------------------------------------------------------------------------------------------------------------------------------------------------------------------------------------------------------------------------------------------------------------------------------------------------------------------------------------------------------------------------------------------------------------------------------------------------------------------------------------------------------------------------------------------|
|                                                                                                                                                                                                                                                                                                                                 | Similarities                                                                                                                                                                                                                                                                                                                                               | What our study adds                                                                                                                                                                                                                                                                                                                                                                                                                                                                                                                                                                                                                                                                                                                                                                                                                                                                                                                                                                                                   |
| <p><b>2. The case holder:</b><br/>GP has on-going relationship with family before, during and after referral to children’s social care. This role builds on voluntary disclosure and establishing trust over time with the parents. This role was clearly identified by GPs but not recognised so much by the stakeholders.</p> | <p>Comparable to the role that GPs in our sample described in relation to ‘stable at this point’, ‘on the edge’ and ‘was it, wasn’t it?’ families, both in the on-going nature of the relationship with families and in the reliance on voluntary disclosure and trust by parents. This was the most commonly described role by the GPs in our sample.</p> | <p>This role might be performed most commonly where:</p> <ul style="list-style-type: none"> <li>• Families had multiple health problems (including those caused by child neglect) which: <ul style="list-style-type: none"> <li>○ Provided a reason for repeated contact</li> <li>○ Legitimised GP intervention in child safeguarding concerns</li> <li>○ Offered opportunity for establish trust and reciprocity and encourage help-seeking behaviours by meeting high need</li> </ul> </li> <li>• GPs perceived that social care was not/not likely to offer appropriate services</li> <li>• GPs could construct concerns as due to “incompetent” (rather than “malicious” parenting) which allowed sympathy with the parents and facilitated on-going GP involvement.</li> </ul> <p>These factors were typical of families who prompted concerns about chronic <i>neglect</i>.</p> <p>The ‘case-holder’ role also included monitoring, coaching, advocating and providing opportunistic preventive healthcare.</p> |

| Four roles outlined by Tompsett et al*                                                                                                                                                                                                                                                                                                                                                                                                                                                                                                                                                                                                                                                                                                                                                                                                                                                                                                                                                                                                            | Relevant findings from our study                                                                                                                                             |                                                                                                                                                                                                                                                                                                                        |
|---------------------------------------------------------------------------------------------------------------------------------------------------------------------------------------------------------------------------------------------------------------------------------------------------------------------------------------------------------------------------------------------------------------------------------------------------------------------------------------------------------------------------------------------------------------------------------------------------------------------------------------------------------------------------------------------------------------------------------------------------------------------------------------------------------------------------------------------------------------------------------------------------------------------------------------------------------------------------------------------------------------------------------------------------|------------------------------------------------------------------------------------------------------------------------------------------------------------------------------|------------------------------------------------------------------------------------------------------------------------------------------------------------------------------------------------------------------------------------------------------------------------------------------------------------------------|
|                                                                                                                                                                                                                                                                                                                                                                                                                                                                                                                                                                                                                                                                                                                                                                                                                                                                                                                                                                                                                                                   | Similarities                                                                                                                                                                 | What our study adds                                                                                                                                                                                                                                                                                                    |
| <p><b>3. The sentinel:</b><br/>GP identifies child maltreatment and refers the concern to social care or other health services.</p>                                                                                                                                                                                                                                                                                                                                                                                                                                                                                                                                                                                                                                                                                                                                                                                                                                                                                                               | <p>Comparable to the role for families with 'fairly straightforward' concerns (infrequently described). Here concerns were referred onwards with no further involvement.</p> | <p>This role might be performed most commonly where:</p> <ul style="list-style-type: none"> <li>• GPs perceived that other agencies responded (or would respond) appropriately.</li> </ul> <p>This was typically in cases of concerns about <i>physical abuse</i> or, less frequently, an episode of acute neglect</p> |
| <p><b>4. The gatekeeper:</b><br/>GP provides information to other agencies so that those agencies can make decisions about access to services.</p>                                                                                                                                                                                                                                                                                                                                                                                                                                                                                                                                                                                                                                                                                                                                                                                                                                                                                                | <p>This role was not directly comparable to any described by the GPs in the sample.</p>                                                                                      | <p>The GPs did offer information to social care, especially for "stable at this point" families. However, this information was unprompted and resulted from on-going monitoring and risk assessment for families with a history of very serious child-maltreatment concerns who had achieved a fragile stability.</p>  |
| <p><b>5. Multi-agency team player:</b><br/>GP has continued engagement with other professionals outside the practice. This role is fulfilled when GP contributes actively to social care child protection processes.</p>                                                                                                                                                                                                                                                                                                                                                                                                                                                                                                                                                                                                                                                                                                                                                                                                                          | <p>Comparable to the few instances in which GPs described working with social care and actively participating in their child protection processes.</p>                       | <p>This role might be performed most commonly where:</p> <ul style="list-style-type: none"> <li>• GPs knew the families well and did not trust social care to offer appropriate services<br/>AND</li> <li>• GPs perceive that there were medical issues giving them a unique medical perspective</li> </ul>            |
| <p>* The study by Tompsett et al was a mixed methods study aiming to explore the nature and consequences of conflicts of interests for English GPs in safeguarding children, though the scope of the findings were much broader than its original aim suggests. The study consisted of: a literature review of research and policy on the role of the GP in safeguarding children; a survey of 96 English GPs, in-depth interviews with a subset of these GPs (N=14); interviews with key stakeholders (professionals operating a strategic level in two Primary Care Trusts PCTs and the relevant Local Safeguarding Children's Board (N=19); focus groups with young people (N=1), young mothers (N=1) and a minority ethnic group (N=1); and a Delphi consensus about the guiding principles of GPs in safeguarding children (with 25 experts). Data was collected between 2006 and 2008. To our knowledge, this study is the only existing source of empirical data about how GPs are responding to concerns and neglect in a UK setting.</p> |                                                                                                                                                                              |                                                                                                                                                                                                                                                                                                                        |

## Facilitators and barriers

### The relationship between GPs and families

Participants described how they went out of their way and invested significant time and effort to develop trust with parents as part of their response to maltreatment-related concerns. This was the strongest and most persistent theme across the interviews. GPs described how they cultivated a position as trusted ally – a dependable professional who had a family’s best interests at heart (Box 1, quote 1). Trust and engagement were seen as necessary for monitoring maltreatment-related concerns (encouraging patients to “come through the door”, seek help with parenting and honestly disclose information) and providing coaching and advocacy (encouraging parents to be receptive to advice; Box 1, quotes 2 and 3 and Table 2). Keeping parents in contact with and engaged with General Practice was a key motivator for the participants (Box 1, quotes 4 and 5). GPs saw that it was easiest to develop trust and encourage engagement when they had something to offer the family, such as being able to meet high health need or write a letter in support of state benefits and/or housing (Box 1, quotes 6 and 7). Developing trust with parents was perceived to have potential harms as well as benefits. Several participants highlighted the potential for the child’s needs to be overlooked or the extent of the maltreatment “missed” due to a focus on parental needs and the primacy GP-parent relationship. The GPs described themselves as consciously navigating a course between benefit and harms (Box 1, quotes 8 and 9).

## Box 1: The relationship between GP and family: quotations

1  
2  
3  
4  
5  
6  
7  
8  
9  
10  
11  
12  
13  
14  
15  
16  
17  
18  
19  
20  
21  
22  
23  
24  
25  
26  
27  
28  
29  
30  
31  
32  
33  
34  
35  
36  
37  
38  
39  
40  
41  
42  
43  
44  
45  
46  
47  
48  
49  
50  
51  
52  
53  
54  
55  
56  
57  
58  
59  
60

1: "Well, I just wanted her [the mother] to know [...] there was someone steady and with their hand on the tiller." (*Participant 8; 8y old*)

2: "it's [the reason to develop trust] not frightening them away because , as well, there is that kind of unseen agreement between you. She is thinking: 'if this gets a bit much for me, I might be asking you for a bit more help'. 'How will you be when I ask you for more help?' and I am thinking 'if this gets too much for you I might ask you if you need more help. I want you to be accepting of that help and not worried about it.'" (*Participant 0, 4y with older siblings*)

3: I have no teeth to then in any way punish her [the mother] or hold her otherwise to account. All I can say is I'm disappointed that you haven't done this. [...] Doctors don't go about punishing patients by and large. We rely on our encouragement and then a sort of heavy sigh and well..." (*Participant 4, 2.5y old*)

4: "The way general practice is set up is, is that we respond to people who decide that they want our help. [...] You know what's come to you, but you don't know what's out there that isn't coming to you, that isn't choosing to come through the door, for whatever reason." (*Participant 7, 6 and 10y*)

5: "[If we don't engage her] that girl will shut herself and we will not be able to get all the story from her what's happening" (*Participant 15, 9 and 11y*)

6: "...making sure they have got the right meds, making sure that you hurry along the referrals, making sure that they are dealt with politely...." (*Participant 0, 4y with two older siblings*)

7: "because we can actually give them what they think they want but there may be a trade-off. 'I can get what I want, if I accept this.' (*Participant 0, 4y old child with two older siblings*)

8: "So I was kind of...I'm try...I'm trying to steer a line between, um, keeping her [the mother] informed and feeling I'm kind of...and not wanting to miss anything." (*Participant 8, 8y*)

9: "So it's a fine balance to make and sometimes as a professional you have to make sure everybody is safe and at the same time you keep that confidence." (*Participant 15, 9 and 11y*)

### The relationship between GPs and health visitors

In all but three interviews, GPs revealed dependence on health visitors in their responses to maltreatment-related concerns and talked about this professional group far more than any other. Access to health visitor knowledge, assessments and time was seen as a necessarily facilitator of monitoring, referral to children's social care and working with children's social care (Table 2). However, the two health visitors in our sample did not see GPs as central to their safeguarding work unless there was a 'medical' element to the concern (Box 2, quotes 1 and 2). The two health visitors believed GPs had much more limited knowledge than they did (Box 2, quote 3) and were ignorant of important information, despite having regular contact with these families (Box 2, quotes 4 and 5). The health visitors viewed GPs as keen to avoid or off-load child protection work (Box 2, quotes 5 and 6). Both health visitors and GPs recognised that their relationship was undermined by the trend towards re-location of health visitors away from General Practice. The responses that GPs described as reliant on health visitor input and communication should be viewed in the context of the probably imperfect and unequal relationship between the two professionals.

## Box 2: The relationship between GPs and health visitors: quotations

1  
2  
3  
4  
5  
6  
7  
8  
9  
10  
11  
12  
13  
14  
15  
16  
17  
18  
19  
20  
21  
22  
23  
24  
25  
26  
27  
28  
29  
30  
31  
32  
33  
34  
35  
36  
37  
38  
39  
40  
41  
42  
43  
44  
45  
46  
47  
48  
49  
50  
51  
52  
53  
54  
55  
56  
57  
58  
59  
60

1: Interviewer: "And how do you see, how does a GP or that GP surgery support you with what you're doing with the family?"

Respondent: "I don't know, yeah. I, I, I mean I'll ring up and I'll say I'm worried and they'll, but yeah, I don't know really." (*Participant 2, 2y and 3y*)

2: "Unless it was a health need as in, did I see a burn on the arm, then I might [inform the GP]. But certainly if it was just emotional kind of neglect or anything like that, I wouldn't routinely phone the GP there and then to say I'd made the referral." (*Participant 16, talking generally*)

3: "Certainly in my experience I've never been informed of anything that I didn't know of via a GP." (*Participant 16, talking generally*)

4: "I don't think they were aware, and certainly weren't aware that she was going off on drinking binges and leaving the children." (*Participant 16, health visitor, Site 1, Family 31, children 3 and 7y*)

5: "I don't think they're aware of the problems" (*Participant 1, 4 children under 6y*)

6: "...but it is worrying and it happens more often than what I think we know, that GPs avoid addressing issues." (*Participant 16, an infant and 2y old*)

7: "I think they're, again, a family that probably take up quite a lot of the GP's time so the GP's quite happy to sort of share it out." (*Participant 1, 4 children under 6y*)

8: "I think ultimately being based in the same building, seeing people day to day, you know in the kitchen, putting the kettle on, that kind of daft thing does build a good relationship" (*Participant 16, 3 and 7y*)

only

### Relationships between GPs and other professionals

In comparison to their description of working with health visitors, GPs gave relatively little detail about how relationships with other professionals helped or hindered their responses. GPs wished to be seen as separate from children's social care and paediatric services, which they thought patients saw as punitive and policing (Box 3, quotes 1-3). Both services were perceived to be insensitive to the GP's position: social care did not provide necessary feedback to the GP (Box 3, quote 4) and paediatric services could unthinkingly and unnecessarily damage hard-earned GP-patient relationships (Box 3, quote 5). The one-way flow of information share with children's social care was seen to be exacerbated by lack of personal relationships between GPs and social workers and high staff turn-over within children's social care. In the case of paediatric services, GPs were able to draw on personal contacts to deliberately seek out trusted paediatricians (Box 3, quote 6).



## Box 3: GPs and other professionals: quotations

1  
2  
3  
4  
5  
6  
7  
8  
9  
10  
11  
12  
13  
14  
15  
16  
17  
18  
19  
20  
21  
22  
23  
24  
25  
26  
27  
28  
29  
30  
31  
32  
33  
34  
35  
36  
37  
38  
39  
40  
41  
42  
43  
44  
45  
46  
47  
48  
49  
50  
51  
52  
53  
54  
55  
56  
57  
58  
59  
60

1: "I think a lot of people view social services as their only job is to take children away."  
(Participant 13, unborn child)

2: "she [the paediatrician] is seen as just there to check up on you." (Participant 0,  
13m old child)

3: "that can affect your relationship with the patient because then they lump you with social  
services and see you as part of the people trying to take away their child." (Participant 13,  
GP Registrar, unborn child)

4: "You don't get information from social services. They don't let you know, unless  
there happens to be a reason for them ringing because they want information from  
us." (Participant 7, unborn child)

5: "They saw a general paediatrician, he just thought it was rough play and he didn't  
see why on earth I'd sent them along, which completely undermined our position.  
The last thing we needed was to get a secondary care response that did that  
because it then became more difficult to engage them at a child in need level  
because it's much more voluntary, isn't it?" (Participant 5, three children 5m-3y old)

6: "So I think that would – that's – I think it's very important that as clinicians we sit  
and talk to each other about who we trust and who we don't trust in secondary care  
as well." (Participant 2, talking generally)

**“A very medical role”**

Just as the two health visitors confined the GPs role to a “medical” one, so the GPs in the sample framed their responses as “medical”. Framing of responses and problems as “medical” was one way that the GPs justified and legitimised their on-going involvement with families who had known maltreatment-related problems. In this way the medicalization of maltreatment-related concerns and responses acted as a facilitator of GP action.

On-going involvement with the maltreatment-related concerns was justified first and foremost in terms of high medical need in the families (Box 4, quote 1). Several GPs stated or implied that contact with families for maltreatment-related concerns in the absence of “medical” need was not a legitimate part of the GP’s role (Box 4, quote 2). The theoretical distinction between “medical” and “social” problems was used by participants to delineate where the GP could legitimately be involved with maltreatment-related concerns. However, elsewhere in the interviews, this neat distinction was challenged. “On the edge” families were described as presenting indiscriminately with health and social welfare need (Box 4, quote 3) and one participant described how the complex mix of family need forced her to step into multiple roles, some of which were perceived to be contested (Box 4, quote 4). The extent and nature of the GP role was a difficult and slippery concept for the GP participants.

Figure 1 summarises the relationship between the families that GPs described responding to, the actions they described taking and the important barriers and facilitators that helped or hindered these responses.

## Box 4: GPs and other professionals: quotations

1: Interviewer: "And what do you think is your role as a GP for them?"

Respondent: "Well, I...I...I think that we'll always have a very medical role for this family. They're very...they have very great medical needs so they...that's kind of...although it's difficult, is the relatively easy bit. I mean, how we tap into the sort of welfare issues of families and children, I think is, um, much more difficult, much more difficult." (*Participant 5, 4y old with four siblings*)

2: "...arranging follow up for the purposes of reviewing concerns around umm, safeguarding, I wouldn't see as part of our role." (*Participant 7, children aged 6 and 10y*)

3: "They used to come for their medications. They used to come for all these letters for Social Services, letters for something, housing, benefit or something or something." (*Participant 15, 2y old*)

4: "... maybe we should just be saying, well, I'm sorry, but there's nothing I can do or, you know, I am the GP, I'm not the social worker. If she's not going to school, you know, you'll have to phone social services or somebody else who can do this, because that's not my job. And maybe we sort of just blurred boundaries too much by taking on work that possibly isn't really appropriate for us to do." (*Participant 10, 3 children 9-16y*)

view only

## DISCUSSION

### Summary of findings

GPs described being actively involved with the management of (possible) child neglect and emotional abuse and much of their response was aimed at the parents or the whole family. GPs described seven important responses: monitoring, advocating, coaching, providing opportune healthcare, referring to other services, working with other services and recording. Three main facilitators emerged from the data. First, help-seeking behavior and honest disclosure from parents was deliberately encouraged by the GPs who described significant effort in establishing a trusting and reciprocal relationship. Parental engagement with General Practice and help-seeking behaviour was seen as necessary for GP responses to have any chance of changing parental mindset or behaviour and thereby improving circumstances for the child. Secondly, information and support from health visitors, which was threatened by mismatched expectations and relocation of health visitors. Thirdly, conceptualization of the problem and the response as “medical”, which permitted and justified GP involvement. GPs saw some limitations of the way that they responded including: working within a reactive system, potentially prioritizing the needs of the parent over those of the child or “missing” things.

This study describes responses that are feasible where there is some expertise and interest within General Practice. Accounts were detailed and candid and included expressions of emotion, uncertainty and doubt. Although this study does not quantify how far the family types represent maltreatment-related concerns among all GPs in England, the families described by our participants are likely to be familiar within General Practice. Descriptions of “on the edge” and “stable at this point families” were compatible with other descriptions of families and adults with social welfare problems in this setting.<sup>12</sup> “On the edge” narratives resonated with another well-known presentation: the “heart-sink” patient. “Heart-sink” patients have been described as those whose chronic and multiple problems cannot be cured or solved and which evoke exasperation, defeat and helplessness in the GP.<sup>13 14</sup>

1  
2  
3 Equally, although we do not know how far the seven responses are being used in  
4 General Practice more widely, they do reflect core GP skills. Monitoring, which can also  
5 been termed review or “watchful waiting” is a substantial part of GP practice and has  
6 been used as part of proactive management for other groups who present with a  
7 mixture of social and welfare problems, such as the frail elderly.<sup>15</sup> Acting as an  
8 advocate to help patients access and navigate services within and beyond the NHS  
9 constitutes part of managing chronic health conditions in General Practice and is  
10 expected by patients.<sup>16 17-19</sup>

11  
12  
13  
14  
15  
16  
17  
18 Coaching incorporates elements common to promoting “self-management” of chronic  
19 disease and “motivational interviewing”, in which professionals attempt to activate the  
20 response from patients by encouraging them to take responsibility for their own  
21 health.<sup>20</sup> Providing opportune healthcare as a routine part of consultations has been  
22 long considered a fundamental part of the GP consultation.<sup>21</sup> Feedback from  
23 participants on provisional results supported the interpretation of monitoring,  
24 advocating, coaching and opportune healthcare as core GP work. Several GPs stated  
25 they would use these skills more widely, specifically for patients with cancer or multi-  
26 morbidities.

27  
28  
29  
30  
31  
32  
33  
34  
35 Building rapport, providing education and assertive follow-up have elsewhere been  
36 described as acceptable strategies for dealing with families at risk of child neglect in  
37 General Practice.<sup>22</sup> Other qualitative studies report that GP responses to social welfare  
38 concerns in children, including concerns about child abuse or neglect, are often aimed  
39 at parents.<sup>11 23-25</sup> Our findings significantly overlap with those from the one other study  
40 that has explored the role of the GPs in child safeguarding in the UK,<sup>11</sup> ( see Table 3).

41  
42  
43  
44  
45  
46  
47  
48  
49  
50  
51  
52  
53  
54  
55  
56  
57  
58  
59  
60  
The GPs in our sample saw the potential for both benefit and harm in their approach  
to maltreatment-related concerns. Many of these overlap with the benefits and harms  
which have been attributed to the GP-patient relationship in qualitative studies about  
the management of chronic conditions. A trusting and constant doctor-patient  
relationship has been seen by both doctors and patients as facilitating honest  
disclosure of hardships (such as domestic violence and past abuse), to help patients  
cope with these issues,<sup>26</sup> and to offer GPs a mechanism for changing patient attitudes

1  
2  
3 and behavior.<sup>20 26</sup> However, GPs also agree that if the relationship is not sufficiently  
4 strong, attempting to “coach” patients might scare them away from using services  
5  
6<sup>20</sup> and a dysfunctional doctor-patient relationship might promote tolerance of “bad”  
7  
8 behavior by doctors or may make GPs more likely to miss new and serious  
9  
10 symptoms.<sup>26 27</sup> Analyses of maltreatment-related child deaths suggest that therapeutic  
11 relationships can be very dangerous for the child if professionals do not recognise  
12 disguised compliance (apparent co-operation by parents to diffuse professional  
13 intervention) or if empathy with parents is accompanied by “silo” working (failure to  
14 look at a child’s needs outside of their own specific brief).<sup>28</sup>

15  
16  
17  
18  
19  
20 Future studies are needed to evaluate the impact of the responses we have identified  
21 on children and families who prompt maltreatment-related concerns in General  
22 Practice. Such studies should take into account the considerable skill required to use  
23 the therapeutic relationship for monitoring and coaching, the potential for more harm  
24 than good and that the responses may only be considered acceptable for concerns  
25 about neglect or emotional abuse and/or feasible for a subset of help-seeking  
26 families.<sup>28</sup> This is especially important in light of evidence that suggests that vulnerable  
27 parents and adolescents find it difficult to engage with General Practice, do not trust  
28 GPs and feel they are judged and/or not listened to in this setting.<sup>11 29</sup>

### 36 Implications

- 37  
38  
39 • As the responses represent core skills and activities of General Practice which  
40 are used for other patient groups, there is likely to be significant existing  
41 expertise within General Practice.
- 42  
43  
44 • A shift in thinking to incorporate these responses into “safeguarding” activity  
45 and early interventions for vulnerable families might make this work more  
46 central and relevant to GPs who do not consider themselves to have specialist  
47 expertise in this area.
- 48  
49  
50 • Joint-working with other professionals is required for GPs to respond to  
51 maltreatment-related concerns in General Practice. However, the GP might be  
52 the most important professional for families who present regularly to General  
53 Practice with high health need. GPs might be able to impact on child outcomes

1  
2  
3 through treating health needs of the parents. We do not know what proportion  
4 of families with maltreatment-related concerns fit this description.

- 5  
6  
7  
8  
9  
10  
11  
12  
13  
14  
15  
16  
17  
18  
19  
20  
21  
22  
23  
24  
25  
26  
27  
28  
29  
30  
31  
32  
33  
34  
35  
36  
37  
38  
39  
40  
41  
42  
43  
44  
45  
46  
47  
48  
49  
50  
51  
52  
53  
54  
55  
56  
57  
58  
59  
60
- Funding is needed to develop a model of response to child maltreatment in General Practice which incorporates the seven responses we identified. Any such model must prioritise the therapeutic relationship and establishing genuine help-seeking behaviour in parents, whilst also recognising the potential harms of this approach. Concerns about discouraging families from presenting to health care services should be taken seriously. This research will also be pertinent to developing the role of “lead professional” for GPs.
  - Models of GP practice in relation to child maltreatment must be rigorously evaluated for efficacy, safety and cost.

1  
2  
3  
4  
5  
6  
7  
8  
9  
10  
11  
12  
13  
14  
15  
16  
17  
18  
19  
20  
21  
22  
23  
24  
25  
26  
27  
28  
29  
30  
31  
32  
33  
34  
35  
36  
37  
38  
39  
40  
41  
42  
43  
44  
45  
46  
47  
48  
49  
50  
51  
52  
53  
54  
55  
56  
57  
58  
59  
60

**Legend for Figures**

Figure 1: To whom were GPs responding to, what actions did they take and what were the facilitators and barriers of these actions?

For peer review only



**Data sharing statement**

No additional data is available.

**Ethics**

Ethical approval for the interviews and observations was given by Central London 1 NHS Research Ethics Committee on the 8<sup>th</sup> October 2010 (Reference 10/H0718/6)

**Acknowledgements**

We would like to thank the professionals who gave up their valuable time to make this study possible.

**Contributorship**

JW designed the study, conducted the interviews, analysed and interpreted data. She is guarantor. RG and MB designed the study, supervised analyses and contributed to the writing of the paper. DG and JA contributed to the design of the study, interpretation of findings and contributed to the writing of the paper. For ethical reasons only JW, RG and MB had had full access to the data in the study. They take responsibility for the integrity of the data and the accuracy of the data analysis.

**Competing interest**

No competing interests stated.

**Funding**

JW was funded by an MRC/ESRC interdisciplinary PhD studentship. The funders did not have any role in study design; analysis or interpretation of data; in the writing of the report; or in the decision to submit the article for publication. RG is an investigator with the Farr Institute of Health Informatics Research-London

**Exclusive license statement**

"I, *Jenny Woodman*, The Corresponding Author of this article contained within the original manuscript which includes any diagrams & photographs within and any related

1  
2  
3 or stand alone film submitted (the Contribution”) has the right to grant on behalf of all  
4 authors and does grant on behalf of all authors, a licence to the BMJ Publishing Group  
5 Ltd and its licencees, to permit this Contribution (if accepted) to be published in the  
6 BMJ and any other BMJ Group products and to exploit all subsidiary rights, as set out in  
7 our licence set out at: [http://www.bmj.com/about-bmj/resources-authors/forms-](http://www.bmj.com/about-bmj/resources-authors/forms-policies-and-checklists/copyright-open-access-and-permission-reuse)  
8 [policies-and-checklists/copyright-open-access-and-permission-reuse.](http://www.bmj.com/about-bmj/resources-authors/forms-policies-and-checklists/copyright-open-access-and-permission-reuse)”  
9  
10  
11  
12  
13  
14  
15  
16  
17  
18  
19  
20  
21  
22  
23  
24  
25  
26  
27  
28  
29  
30  
31  
32  
33  
34  
35  
36  
37  
38  
39  
40  
41  
42  
43  
44  
45  
46  
47  
48  
49  
50  
51  
52  
53  
54  
55  
56  
57  
58  
59  
60

For peer review only

1. Radford L, Corral S, Bradley C, Fisher H, Bassett C, Howat N, et al. *Child abuse and neglect in the UK today*. London: NSPCC, 2011.
2. Gilbert R, Kemp A, Thoburn J, Sidebotham P, Radford L, Glaser D, et al. Recognising and responding to child maltreatment. *Lancet* 2009;373(9658):167-80.
3. HM Government. Working together to safeguard children: a guide to inter-agency working to safeguarding and promoting the welfare of children, 2013.
4. Gilbert R, Widom CS, Browne K, Fergusson D, Webb E, Janson S. Burden and consequences of child maltreatment in high-income countries. *Lancet* 2009;373(9657):68-81.
5. Woodman J, Freemantle N, Allister J, de Lusignan S, Gilbert R, Petersen I. Variation in recorded child maltreatment concerns in UK primary care records: a cohort study using The Health Improvement Network (THIN) database. *PLOS ONE* 2012;7(11):1-9.
6. Woodman J, Allister J, Rafi I, de Lusignan S, Belsey J, Petersen I, et al. Simple approaches to improve recording of concerns about child maltreatment in primary care records: developing a quality improvement intervention. *Br J Gen Pract* 2012;62(600):e478-e86(9).
7. National Society for the Prevention of Cruelty to Children, Royal College of General Practitioners. Safeguarding children and young people: A toolkit for general practice. London: RCGP, 2011.
8. National Institute for Health and Clinical Excellence. *When to suspect maltreatment*. London: NICE, 2009.
9. Braun V, Clarke V. Using thematic analysis in psychology. *Qualitative research in psychology* 2006;3(2):77-101.
10. Green J, Thorogood N. *Qualitative methods for health research*. 2nd Edition ed: Sage Publications Ltd, 2009.
11. Tompsett H, Ashworth M, Atkins C, Bell L, Gallagher A, Morgan M, et al. *The child, the family and the GP: tensions and conflicts of interest for GPs in safeguarding children May 2006-October 2008 Final report February 2010*. London: Kingston University, 2010.
12. Popay J, Kowarzik U, Mallinson S, Mackian S, Barker J. Social problems, primary care and pathways to help and support: addressing health inequalities at the individual level. Part I: the GP perspective. *Journal of Epidemiology and Community Health* 2007;61(11):966-71.
13. O'Dowd TC. Five years of heartsink patients in general practice. *BMJ* 1988;297(6647):528-30.
14. Butler CC, Evans M. The 'heartsink' patient revisited. The Welsh Philosophy And General Practice discussion Group. *Br J Gen Pract* 1999;49(440):230-3.
15. Sheaff R, Boaden R, Sargent P, Pickard S, Gravelle H, Parker S, et al. Impacts of case management for frail elderly people: a qualitative study. *J Health Serv Res Policy* 2009;14(2):88-95.
16. Hanks H, Veitch C, Harris M. Colorectal cancer management - the role of the GP. *Aust Fam Physician* 2008;37(4):259-61.
17. Lester H, Khan N, Jones P, Marshall M, Fowler D, Amos T, et al. Service users' views of moving on from early intervention services for psychosis: a longitudinal qualitative study in primary care. *Br J Gen Pract* 2012;62(596):e183-90.
18. Popay J, Kowarzik U, Mallinson S, Mackian S, Barker J. Social problems, primary care and pathways to help and support: addressing health inequalities at the individual level. Part II: lay perspectives. *Journal of Epidemiology and Community Health* 2007;61(11):972-77.
19. Greenhalgh T, Robb N, Scambler G. Communicative and strategic action in interpreted consultations in primary health care: a Habermasian perspective. *Soc Sci Med* 2006;63(5):1170-87.
20. Blakeman T, Bower P, Reeves D, Chew-Graham C. Bringing self-management into clinical view: a qualitative study of long-term condition management in primary care consultations. *Chronic Illn* 2010;6(2):136-50.
21. Stott NC, Davis RH. The exceptional potential in each primary care consultation. *J R Coll Gen Pract*. 1979;29(201):201-5.
22. Brent DA, Silverstein M. Shedding Light on the Long Shadow of Childhood Adversity. *JAMA* 2013;309(17):1777-78.

- 1  
2  
3 23. Lykke K, Christensen P, Reventlow S. The consultation as an interpretive dialogue about the  
4 child's health needs. *Family Practice* 2011;0:1-7.  
5 24. Lykke K, Christensen P, Reventlow S. "This is not normal ... "--signs that make the GP question  
6 the child's well-being. *Fam Pract* 2008;25(3):146-53.  
7 25. Hølge-Hazelton B, Tulinius C. Beyond the specific child What is 'a child's case' in general practice?  
8 *The British Journal of General Practice* 2010;60(570):e4.  
9 26. Cocksedge S, Greenfield R, Nugent GK, Chew-Graham C. Holding relationships in primary care: a  
10 qualitative exploration of doctors' and patients' perceptions. *Br J Gen Pract*  
11 2011;61(589):e484-91.  
12 27. Chew-Graham CA, May CR, Roland MO. The harmful consequences of elevating the doctor-  
13 patient relationship to be a primary goal of the general practice consultation. *Fam Pract*  
14 2004;21(3):229-31.  
15 28. Brandon M. Understanding Serious Case Reviews and their Impact: A biennial analysis of serious  
16 case reviews 2005-07. London, 2009.  
17 29. Boddy J, Statham J, Warwick I, Hollingworth K, Spencer G. Health Related Work in Family  
18 Intervention Projects. London, 2012.  
19  
20  
21  
22  
23  
24  
25  
26  
27  
28  
29  
30  
31  
32  
33  
34  
35  
36  
37  
38  
39  
40  
41  
42  
43  
44  
45  
46  
47  
48  
49  
50  
51  
52  
53  
54  
55  
56  
57  
58  
59  
60

peer review only

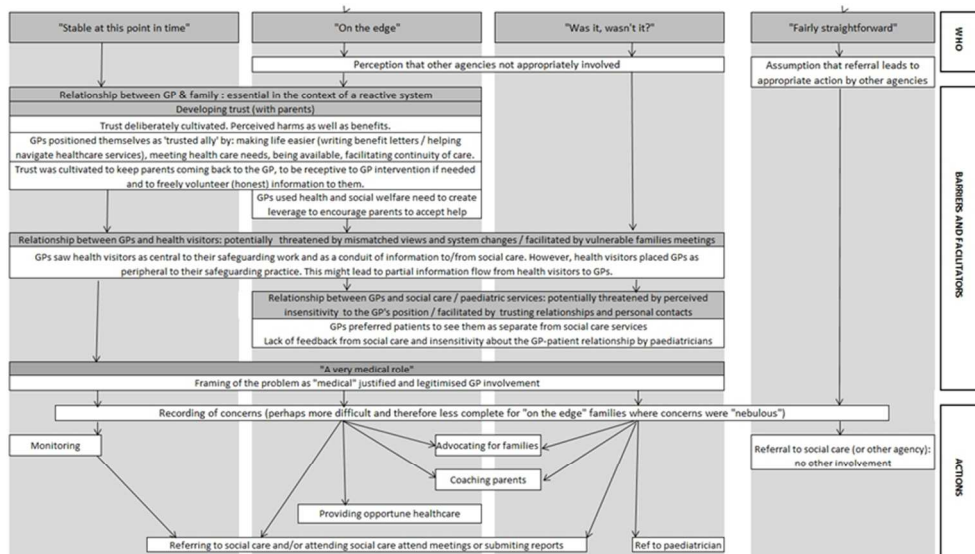

245x158mm (96 x 96 DPI)



**Responses to concerns about child maltreatment: a  
qualitative study of GPs in England**

|                                 |                                                                                                                                                                                                                                                                                                                                                                                                                                                            |
|---------------------------------|------------------------------------------------------------------------------------------------------------------------------------------------------------------------------------------------------------------------------------------------------------------------------------------------------------------------------------------------------------------------------------------------------------------------------------------------------------|
| Journal:                        | <i>BMJ Open</i>                                                                                                                                                                                                                                                                                                                                                                                                                                            |
| Manuscript ID:                  | bmjopen-2013-003894.R1                                                                                                                                                                                                                                                                                                                                                                                                                                     |
| Article Type:                   | Research                                                                                                                                                                                                                                                                                                                                                                                                                                                   |
| Date Submitted by the Author:   | 11-Oct-2013                                                                                                                                                                                                                                                                                                                                                                                                                                                |
| Complete List of Authors:       | Woodman, Jenny; UCL-Institute of Child Health, Department of Paediatric Epidemiology and Biostatistics<br>Gilbert, Ruth; UCL-Institute of Child Health, Department of Paediatric Epidemiology and Biostatistics<br>Allister, Janice; Royal College of General Practitioners,<br>Glaser, Danya; Great Ormond Street Hospital for Children NHS Foundation Trust,<br>Brandon, Marian; University of East Anglia, Centre for Research on Children and Families |
| <b>Primary Subject Heading</b>: | Paediatrics                                                                                                                                                                                                                                                                                                                                                                                                                                                |
| Secondary Subject Heading:      | Health services research, Paediatrics, Public health, Qualitative research                                                                                                                                                                                                                                                                                                                                                                                 |
| Keywords:                       | Child protection < PAEDIATRICS, PRIMARY CARE, PUBLIC HEALTH, QUALITATIVE RESEARCH                                                                                                                                                                                                                                                                                                                                                                          |
|                                 |                                                                                                                                                                                                                                                                                                                                                                                                                                                            |

SCHOLARONE™  
Manuscripts

Only

**Responses to concerns about child maltreatment: a qualitative study of GPs in England**

Jenny Woodman, Ruth Gilbert, Janice Allister, Danya Glaser, Marian Brandon

MRC Centre of Epidemiology for Child Health, UCL-Institute of Child Health,  
London WC1N 1EH  
Research student

MRC Centre of Epidemiology for Child Health, UCL-Institute of Child Health,  
London WC1N 1EH  
Professor of Clinical Epidemiology

Royal College of General Practitioners, 30 Euston Square, London, NW1 2FB  
Child Health Representative

Great Ormond Street Hospital for Children NHS Foundation Trust London  
WC1N 3JH  
Hon Consultant Child and Adolescent Psychiatrist

Centre for Research on Children and Families, Elizabeth Fry Building,  
University of East Anglia, Norwich, NR4 7TJ  
Professor of Social Work

Correspondence to: Jenny Woodman [j.woodman@ucl.ac.uk](mailto:j.woodman@ucl.ac.uk) or  
[jenny.woodman@gmail.com](mailto:jenny.woodman@gmail.com)

1  
2  
3  
4  
5  
6  
7  
8  
9  
10  
11  
12  
13  
14  
15  
16  
17  
18  
19  
20  
21  
22  
23  
24  
25  
26  
27  
28  
29  
30  
31  
32  
33  
34  
35  
36  
37  
38  
39  
40  
41  
42  
43  
44  
45  
46  
47  
48  
49  
50  
51  
52  
53  
54  
55  
56  
57  
58  
59  
60

For peer review only



1  
2  
3 **Key words:** child maltreatment, primary care, GP, responses, qualitative  
4

5 **ABSTRACT**  
6

7  
8 **Objectives:** To provide a rich description of current responses to concerns related to  
9 child maltreatment among a sample of English GPs.  
10

11  
12 **Design:** In-depth, face-to-face interviews (November 2010 to September 2011).  
13

14 Participants selected and discussed families who had prompted “maltreatment-related  
15 concerns”. Thematic analysis of data.  
16

17  
18 **Setting:** 4 General Practices in England.  
19

20  
21 **Participants:** 14 GPs, 2 practice nurses and 2 health visitors from practices with at least  
22 one ‘expert’ GP (expertise in child safeguarding/protection).  
23

24  
25 **Results:** Concerns about neglect and emotional abuse dominated the interviews. GPs  
26 described intense and long-term involvement with families with multiple social and  
27 medical problems. Narratives were distilled into seven possible actions that GPs took  
28 in response to maltreatment-related concerns. These were orientated towards whole  
29 families (monitoring and advocating), the parents (coaching), and children (opportune  
30 healthcare), and included referral to or working with other services and recording  
31 concerns. Facilitators of the seven actions were: trusting relationships between GPs  
32 and parents, good working relationships with health visitors and framing the  
33 problem/response as “medical”. Narratives indicated significant time and energy spent  
34 building facilitating relationships with parents with the aim of improving the child’s  
35 well-being.  
36  
37

38  
39 **Conclusions:** These GPs used core General Practice skills for on-going management of  
40 families who prompted concerns about neglect and emotional abuse. Policy and  
41 research focus should be broadened to include strategies for direct intervention and  
42 on-going involvement by GPs, such as using their core skills during consultations and  
43 practice systems for monitoring families and encouraging presentation to General  
44 Practice. Exemplars of current practice, such those identified in our study, should be  
45 evaluated for feasibility and acceptability in representative General Practice settings as  
46  
47  
48  
49  
50  
51  
52  
53  
54  
55  
56  
57  
58  
59  
60

1  
2  
3 well as tested for efficacy, safety and cost. The seven actions could form the basis for  
4 the “lead professional” role in General Practice as proposed in the 2013 version of  
5  
6 “Working Together ”guidance.  
7  
8  
9  
10  
11  
12  
13  
14  
15  
16  
17  
18  
19  
20  
21  
22  
23  
24  
25  
26  
27  
28  
29  
30  
31  
32  
33  
34  
35  
36  
37  
38  
39  
40  
41  
42  
43  
44  
45  
46  
47  
48  
49  
50  
51  
52  
53  
54  
55  
56  
57  
58  
59  
60

## STUDY SUMMARY

### Article focus

- We aimed to generate hypotheses about how GPs in England might feasibly respond to maltreatment-related concerns in children and families.
- We were interested in a range of responses including, but not limited to, referral to children's social care.

### Key messages

- This study identified seven actions in response to maltreatment-related concerns. These actions reflect core skills and activities of General Practice but might only be feasible for a subset of help-seeking families with possible neglect.
- Robust therapeutic relationships with families, working relationships with health visitors and framing the response as "medical" were identified as necessary facilitators of these actions.
- Potential benefits and harms of these responses were identified by participants. These responses need to be properly evaluated in terms of cost and impact on children and families.

### Strengths / limitations

- This study generated hypotheses about responses that were feasible in English practices with some expertise and interest.
- Participant accounts were detailed and candid and findings resonate with other research in General Practice settings.
- Due to a small and non-random sample, results cannot be generalised to all General Practices in England. Although our results confirm those from other studies, it would be helpful for a similar study to be undertaken with a different sample in order to identify any additional responses.

## INTRODUCTION

Child maltreatment (abuse or neglect) is common, affecting at least 4% of all children in England each year.<sup>1,2</sup> All healthcare professionals have a statutory duty to protect children from child maltreatment.<sup>3</sup> GPs are uniquely placed to respond because they offer services to the whole family often over many years, manage parental problems that put children at risk of child maltreatment, such as mental health and substance misuse<sup>4</sup> and are skilled in fostering relationships, which constitute an important element of social welfare interventions. Although identification could undoubtedly be improved, GPs in England already record maltreatment-related problems in at least 1% of all children registered with them.<sup>5</sup> The true figure for children who raise concerns for GPs is likely to be far higher.<sup>6</sup>

Many children who have their maltreatment-related problems identified will not meet the high thresholds for action by children's social care, which result from social workers prioritising scarce resources in an overstretched service.<sup>2,7,8,9,10</sup> Academics are increasingly recognising that professionals require a range of responses for maltreatment-related concerns, including but not limited to referral to and joint-working with children's social care.<sup>7</sup> This appears to be reflected in policy and good practice guidelines for GPs which recommend that GPs record and monitor concerns, gather information, discuss with colleagues, hold team meetings and, where thresholds are met, refer the family to children's social care.<sup>11-13</sup> However, a closer look at these documents reveals that these recommendations focus on improving recognition of maltreatment, helping health professionals to make decisions about when it is appropriate to refer a child to children's social care and contributing to social care processes. An exception is new (2013) statutory guidance which provides a description of direct intervention by GPs for some children below the threshold for children's social care intervention. This "lead" role is described as supporting the family, acting as an advocate and coordinating support services.<sup>3</sup> There is little further detail about the suggested responses and it is unclear how they might be put into practice or what skills, resources or service context would be needed.

Similarly, there is little empirical research in this area. Existing research tends to conceptualise "response" as referral to children's social care<sup>14</sup> and focuses exclusively

1  
2  
3 on GP participation in social care processes<sup>15 16</sup> or identification of maltreatment-  
4 related problems.<sup>17-19</sup> One exception is a large mixed methods study by Tompsett et al.  
5 which aimed to explore the nature and consequences of conflicts of interests for  
6 English GPs in safeguarding children, though the scope of the findings were much  
7 broader than its original aim suggests.<sup>20</sup> The study consisted of: a literature review; a  
8 survey of 96 English GPs, in-depth interviews with GPs (N=14); interviews with key  
9 stakeholders (N=19); three focus groups with young people, young mothers and a  
10 minority ethnic group; and a Delphi consensus about the guiding principles of GPs in  
11 safeguarding children (with 25 experts). Data was collected between 2006 and 2007.  
12 To our knowledge, this study is the only existing source of empirical data about how  
13 GPs are responding to concerns about maltreatment in an English setting. The study  
14 identified four roles that GPs played in responding to maltreated children and reported  
15 exemplars of good practice for GPs.  
16  
17  
18  
19  
20  
21  
22  
23  
24  
25  
26  
27

28 We aimed to contribute to the scant research literature on how GPs in England can  
29 respond to maltreatment-related concerns by conducting an in-depth qualitative study  
30 asking how a small sample of GPs understood and responded to child maltreatment-  
31 related concerns in their daily practice.  
32  
33  
34  
35  
36  
37  
38  
39  
40  
41  
42  
43  
44  
45  
46  
47  
48  
49  
50  
51  
52  
53  
54  
55  
56  
57  
58  
59  
60

## METHODS

One researcher conducted in-depth individual interviews with 14 GPs, two practice nurses and two health visitors from four GP practices in England. This paper focuses largely on data from the GP interviews. The practices were known to the research team via a previous research study.<sup>6</sup> The four practices were chosen to include geographical spread across England, to have child protection expertise (at least one 'expert' GP who was a named doctor for child protection (1 GP), had delivered child protection training (all 4 GPs) or had contributed to relevant policy (3 GPs)). All four practices had regular discussion of child protection concerns at clinical meetings and two of the four practices had health visitors based on site. The practices had between three and six full-time-equivalent GPs. At three of the practices four GPs were interviewed and at the remaining practice four GPs were interviewed. Participants at each practice were recruited through the gatekeeper 'expert' GP and researcher visits to the practices. The research team met and corresponded with the four gatekeeper GPs during the study set-up and recruitment phase. These gatekeeper GPs were also interviewed. Two pilot interviews were conducted.

By establishing trust and rapport with the participant in individual interviews, we hoped to elicit 'private' account of experiences, attitudes and beliefs in order to understand what *happened* in primary care.<sup>21-23</sup> 'Private' accounts have been defined as those which tend to contain more controversial views and be based on real experiences, with all their complexity and difficulty.<sup>24</sup> 'Public' accounts, on the other hand tend to confirm the dominant ideology (in our case; what GPs think they *should* be doing).<sup>24</sup> Asking participants to recount stories based on experience also helps to elicit accounts that move beyond the socially acceptable or familiar.<sup>22</sup> A study using focus groups to investigate child safeguarding by GPs in Denmark noted that the GPs appeared to be most comfortable with case-based discussion<sup>17</sup> and this approach appeared to be acceptable to participants and to generate rich data in our two pilot interviews.

1  
2  
3 In the interviews, the researcher elicited narratives by asking participants to choose  
4 two or three “children, young people or families who had prompted maltreatment-  
5 related concerns” and describe their concerns and involvement. In keeping with the  
6 aim of allowing participants to tell their stories and control the content, the interviews  
7 were free-ranging with minimal steering from the researcher. Similarly, we did not  
8 specify whether participants should choose children already known to or working with  
9 children’s social care or whether the concern should be current or historical.

10  
11  
12 Our study design allowed for families to be discussed by two or more participants from  
13 the same practice and each expert GP spoke to colleagues to clarify whether this had  
14 been the case. However, the number of cases in which this occurred (only two families  
15 were discussed by more than one GP) was small and not commented upon further in  
16 this paper. Interviews were face-to-face, conducted between November 2010 and  
17 September 2011, lasted an average of 50 minutes and were audio-recorded and later  
18 transcribed. In total, we collected 837 minutes of interview data from 17 participants  
19 (602 minutes from the 14 GP participants).

20  
21  
22 We used thematic analysis with an inductive and interpretive approach.<sup>22 25</sup> The  
23 exception to this was our a priori interest in whether and how GPs recorded concerns  
24 to inform our population-based analyses measuring GP practice.<sup>5</sup> Using NVivo  
25 software, one researcher systematically assigned to each segment of interview  
26 transcript one or more concept labels (open coding). She made constant comparisons  
27 of codes within and between interviews to generate more abstract themes and build  
28 up an understanding of the relationships between them. The abstract themes and  
29 understanding of relationships between them were refined by paying particular  
30 attention to data that did not fit and using reflections on these instances. We sought  
31 participant views on our preliminary results via an e-leaflet. Seven participants (five  
32 GPs) responded, including at least one from each data collection site. This feedback  
33 was incorporated into the final interpretation. One researcher (the interviewer)  
34 conducted the coding and analysis with support from a senior researcher who  
35 independently coded two transcripts and the wider research team who probed and  
36 questioned interpretation throughout the study.

1  
2  
3 This study was conducted as part of a PhD award and more detailed results can be  
4 found in the first author's thesis, due to be published in 2014.  
5  
6

## 7 RESULTS

8  
9 The GP participants tended to be experienced professionals (average 19 years since  
10 qualification; range 5-40 years) who had worked for long periods within their current  
11 practice (average 10 years; range 6 months to 23years). The GPs discussed 26 different  
12 families (range 1-3 families per participant).  
13  
14  
15

16  
17 The data generated themes which we grouped as answers to three overarching  
18 questions: To **whom** were the GPs responding and **why these families?** What **actions**  
19 did they describe taking? What were the important **facilitators or barriers** for these  
20 actions? These questions were identified during data analysis.  
21  
22  
23

### 24 To whom

25  
26 The GP narratives about families were coded as four broad types, which we named  
27 using quotes from the interviews:  
28  
29  
30

- 31  
32 1. **"stable at this point in time but it's a never ending story"**: narratives  
33 describing families with previous very serious child protection concerns who  
34 had since achieved a fragile stability that participants perceived to require extra  
35 vigilance on their behalf. Current concerns were about neglect and emotional  
36 abuse.  
37
- 38 2. **"on the edge"**: narratives describing families who were barely coping and  
39 perceived as liable to tip over the edge at any moment. Concerns were about  
40 neglect and, to a lesser degree, emotional abuse.  
41
- 42 3. **"was it, wasn't it"**: narratives describing situations where participants had a  
43 high degree of uncertainty as to whether physical or sexual abuse had taken  
44 place and where much time was spent trying to establish whether the  
45 suspected abuse was likely to have occurred.  
46
- 47 4. **"fairly straightforward"**: uniformly brief narratives in which there was high  
48 certainty about physical or sexual abuse and decisive onwards referrals.  
49  
50  
51  
52  
53  
54  
55  
56  
57  
58  
59  
60



1  
2  
3 In some cases, it was clear how the participants' views of the family had evolved over  
4 time and, for this reason, some of the 26 families were classified as more than one  
5 family type (see Table 1). "Stable at this point" and "on the edge" families were  
6 discussed with the highest frequency (see Table 1) and occupied most talk-time. For  
7 these families, participants could give a high level of detail about multiple family  
8 members, often reaching back many years. These two family types prompted concerns  
9 about neglect and emotional abuse and it was these concerns that dominated the  
10 interviews:  
11  
12  
13  
14  
15  
16

17  
18 "Neglect really. I think with chaotic lifestyles that the child may become... well  
19 just not be cared for adequately. [...] Parents who become impoverished  
20 because of their drug using behaviour are at just that much more risk of  
21 physical neglect of not feeding the child, not caring for the child, not changing  
22 its nappy, of not... and to an extent emotional neglect as well, just that there's  
23 not enough parenting input."  
24  
25  
26  
27  
28

29 (Participant 14; 7 month old baby)

30  
31  
32 "I'm not worried about the children whether they will be abused physically, I'm  
33 worried about the emotional deprivation rather than... the neglect rather than  
34 the abuse."  
35  
36  
37

38 (Participant 15, two children aged 9 and 11y)

39  
40 For "on the edge" and "stable at this point" families, parental behaviour was  
41 commonly described in terms of "low parenting capacity", "poor parenting" or  
42 "impoverished" parenting. Participants told how they were concerned that these  
43 parents failed to supervise their children adequately, transferred parenting  
44 responsibilities onto older siblings who were themselves young children, failed to set  
45 boundaries, routines or bedtimes, allowed children to miss school, did not adequately  
46 comply with essential medical care for their children and in some cases, might not be  
47 able to keep young children clean and fed.  
48  
49  
50  
51  
52  
53  
54

55 Although we did not systematically collect information on the current status of each  
56 case with children's social care, the contact between this agency and the families was  
57  
58  
59  
60

1  
2  
3 mentioned in many interviews. “On the edge” and “stable at this point” families were  
4 described as being well known to children’s social care , either as child protection  
5 cases (“stable at this point” families) or child in need cases (“on the edge” families; see  
6 Table 1). It was often unclear as to whether “stable at this point” families had *current*  
7 contact with child protection services and this was not probed by the interviewer. It  
8 was not clear whether the “was it, wasn’t it?” or “straightforward” cases were known  
9 to children’s social care prior to the referral made by the participant. See Table 1 for a  
10 detailed summary of all four types of family narrative.  
11  
12  
13  
14  
15  
16  
17  
18  
19  
20  
21  
22  
23  
24  
25  
26  
27  
28  
29  
30  
31  
32  
33  
34  
35  
36  
37  
38  
39  
40  
41  
42  
43  
44  
45  
46  
47  
48  
49  
50  
51  
52  
53  
54  
55  
56  
57  
58  
59  
60

1  
2  
3  
4  
5  
6  
7  
8  
9  
10  
11  
12  
13  
14  
15  
16  
17  
18  
19  
20  
21  
22  
23  
24  
25  
26  
27  
28  
29  
30  
31  
32  
33  
34  
35  
36  
37  
38  
39  
40  
41  
42  
43  
44  
45  
46  
47  
48  
49

**Table 1: Whom (typology of narratives about families)?**

*It is important to remember that these typologies of families only tell us about GP perspectives and understandings and cannot be relied on as accurate data about families.*

| “Stable at this point in time but it’s a never ending story”                                                                                                                                                                                                                                                                                                                                                                                                                                                                                                                                                                                                                                                                                                                                                                  | “On the edge”                                                                                                                                                                                                                                                                                                                                                                                                                                                                                                                                                                                                                                                                                                                                                                                                                       | “Was it, wasn’t it?”                                                                                                                                                                                                                                                                                                                                                                                                                                                                                                                                                                                                                                                                                                                                                                                                             | “Fairly straightforward”                                                                                                                                                                                                                                                                                                                                                                                                                                                                                                                                                                                                                              |
|-------------------------------------------------------------------------------------------------------------------------------------------------------------------------------------------------------------------------------------------------------------------------------------------------------------------------------------------------------------------------------------------------------------------------------------------------------------------------------------------------------------------------------------------------------------------------------------------------------------------------------------------------------------------------------------------------------------------------------------------------------------------------------------------------------------------------------|-------------------------------------------------------------------------------------------------------------------------------------------------------------------------------------------------------------------------------------------------------------------------------------------------------------------------------------------------------------------------------------------------------------------------------------------------------------------------------------------------------------------------------------------------------------------------------------------------------------------------------------------------------------------------------------------------------------------------------------------------------------------------------------------------------------------------------------|----------------------------------------------------------------------------------------------------------------------------------------------------------------------------------------------------------------------------------------------------------------------------------------------------------------------------------------------------------------------------------------------------------------------------------------------------------------------------------------------------------------------------------------------------------------------------------------------------------------------------------------------------------------------------------------------------------------------------------------------------------------------------------------------------------------------------------|-------------------------------------------------------------------------------------------------------------------------------------------------------------------------------------------------------------------------------------------------------------------------------------------------------------------------------------------------------------------------------------------------------------------------------------------------------------------------------------------------------------------------------------------------------------------------------------------------------------------------------------------------------|
| <p>Most common narrative N=16*</p> <ul style="list-style-type: none"> <li>• Very serious and long-term parent drug/alcohol use, mental health problems and domestic violence.</li> <li>• Extensive contact with children’s social care (CSC) child protection services, police and drugs and alcohol services.</li> <li>• Siblings taken into care or died.</li> <li>• Concerns about physical neglect and emotional abuse.</li> <li>• GPs believed that circumstances had recently improved for the children and felt hopeful about capacity to parent in the future.</li> <li>• But new stability was seen as fragile and optimism about future was cautious and uneasy.</li> <li>• Perceived need for continued vigilance to spot relapses (further neglect / emotional abuse) and prevent poor child outcomes.</li> </ul> | <p>Second most common narrative N=12*</p> <ul style="list-style-type: none"> <li>• Lack of boundaries for children; poor school attendance, missed medical appointments, concerns about nutrition and clothing.</li> <li>• Families suffered from: unemployment; inadequate housing; poverty; parental alcohol use or mental health problems; and overwhelming physical health and behavioural problems.</li> <li>• Concerns about neglect and emotional abuse.</li> <li>• Accounts of intermittent and inadequate involvement from child protection services.</li> <li>• Children described as ‘vulnerable’ and often as currently involved with CSC as a child in need.</li> <li>• Problems experienced by GPs as overwhelming and frustrating.</li> <li>• Worry about families “tipping over the edge” at any moment.</li> </ul> | <p>Third most common narrative N=9*</p> <ul style="list-style-type: none"> <li>• Concerns focussed on possible physical or sexual abuse.</li> <li>• Participants were very uncertain whether suspicions “amounted to anything or not” and believed that physical or sexual abuse probably had not occurred.</li> <li>• They described having just enough concern to take further action</li> <li>• In the context of this low level of concern, GPs described CSC’s response as unnecessarily heavy-handed and punitive.</li> <li>• After varying amounts of time (a few days to a year), participants reached the decision, usually in conjunction with CSC, that the child was <i>not</i> likely to have been physically or sexually abused. In the four cases of injured children, participants described on-going</li> </ul> | <p>Least common narrative N=3*</p> <ul style="list-style-type: none"> <li>• These narratives were characterised by concerns about maltreatment described as “obvious” or “barn door” with a high level of suspicion from participants and decisive referrals to CSC or secondary health care.</li> <li>• Narratives were characterised by participants believing that referral to social care or other agencies would result in appropriate and timely services.</li> <li>• These cases were only mentioned in passing and usually as a contrast to one of the other family types, about whom participants talked in detail and at length.</li> </ul> |

1  
2  
3  
4  
5  
6  
7  
8  
9  
10  
11  
12  
13  
14  
15  
16  
17  
18  
19  
20  
21  
22  
23  
24  
25  
26  
27  
28  
29  
30  
31  
32  
33  
34  
35  
36  
37  
38  
39  
40  
41  
42  
43  
44  
45  
46  
47  
48  
49

|  |  |                                                     |  |
|--|--|-----------------------------------------------------|--|
|  |  | concerns about parental supervision (i.e. neglect). |  |
|--|--|-----------------------------------------------------|--|

For peer review only

\* More narratives than families because some families had more than family classification as participant's views of the family evolved over time. CSC=children's social care

### **Why *these* families?**

We asked that GPs discuss cases in which they had been personally involved. The reasons that GP gave for choosing a particular case were: it was particularly “challenging” or “complex”; it was typical; it demanded a lot of time and energy; or it was fresh in their mind following recent contact with the family.

Analysis of the narratives in their entirety revealed a clear divide between “fairly straightforward” narratives in which GPs described onward referral of concerns without further involvement and the other types of families where participants described taking responsibility and having on-going involvement with maltreatment-related concerns. There were three characteristics typical of accounts of intense or long-term involvement with maltreatment-related concerns. First, GP involvement could be justified when GPs perceived high medical need in family members, were in regular contact with the families for this reason and conceptualized their own professional response as a ‘medical’ one. This containment of safeguarding within a medical sphere seemed most compatible with chaotic, neglectful families who were seen to be suffering a host of medical and social problems. Secondly, GPs appeared more motivated to intervene when parents were perceived as ‘incompetent’ rather than malicious. This perspective also seemed most compatible with chaotic, neglectful families in which parents were perceived to have had a poor childhood and were struggling with a multitude of other problems. Thirdly, GPs seemed likely to take responsibility for maltreatment-related concerns when they distrusted the contribution from social care services. GPs distrusted input from children’s social care when they perceived this agency to be underestimating the seriousness of the problem (“on the edge” families) or to be responding in an unnecessarily aggressive and punitive manner (“was it, wasn’t it” families; see Table 1).

### **Actions**

There were seven actions that the GPs described taking in response to maltreatment-related concerns:

1. Monitoring concerns

2. Advocating for families
3. Coaching parents
4. Providing opportune healthcare for children
5. Referral to other services
6. Working with other services
7. Recording concerns

The definitions and descriptions of each of these seven actions are given in Table 2.

Some of the actions were orientated towards whole families (monitoring and advocating), some towards the parents (coaching), some towards the children (opportune healthcare) and some towards other agencies (referral to and working with other services). As Table 2 summarises, the GPs were very aware that their management of maltreatment-related concerns relied on regular contact with families for non-maltreatment related reasons (monitoring and opportune healthcare), help-seeking behaviour and honest disclosure of problems from adult family members (monitoring and advocating), parental engagement with General Practice (coaching and advocating) and being able to offer services that parents wanted (monitoring and opportune healthcare).

Referrals to other services and joint-working across services were discussed almost exclusively in relation to children's social care and paediatric services. GPs acknowledged their reliance on health visitors and GP colleagues for gathering further information (for monitoring) and, in the case of concerns about neglect, deciding whether to make referrals to children's social care. GPs told how they directly referred concerns about sexual or physical abuse to children's social care without consulting other primary care colleagues (Tables 1 and 2). GPs were conscious that they relied on regular meetings of the primary health care team in order to gather wider information about families from health visitors. Health visitors were also seen as a conduit for information about children's social care input with families. For cases perceived to be urgent, health visitors were accessed via telephone or in "corridor conversations", which were perceived to be few and far between following relocation of health visitors away from General Practice.

1  
2  
3  
4  
5  
6  
7  
8  
9  
10  
11  
12  
13  
14  
15  
16  
17  
18  
19  
20  
21  
22  
23  
24  
25  
26  
27  
28  
29  
30  
31  
32  
33  
34  
35  
36  
37  
38  
39  
40  
41  
42  
43  
44  
45  
46  
47  
48  
49

**Table 2: Actions**

| What                                                                                     | For whom                                                                           | How                                                                                                                                                                                                                                                                                                                                                                                                                                                                                                                                                                                                                                                                                                                                                                                                                                                                                                                                                                                                                                                                                                                                                      | Why                                                                                                                                                                                                                                                                                     | Context                                                                                                                                                                                                                                                                                                                                                                                                                                                                                                        |
|------------------------------------------------------------------------------------------|------------------------------------------------------------------------------------|----------------------------------------------------------------------------------------------------------------------------------------------------------------------------------------------------------------------------------------------------------------------------------------------------------------------------------------------------------------------------------------------------------------------------------------------------------------------------------------------------------------------------------------------------------------------------------------------------------------------------------------------------------------------------------------------------------------------------------------------------------------------------------------------------------------------------------------------------------------------------------------------------------------------------------------------------------------------------------------------------------------------------------------------------------------------------------------------------------------------------------------------------------|-----------------------------------------------------------------------------------------------------------------------------------------------------------------------------------------------------------------------------------------------------------------------------------------|----------------------------------------------------------------------------------------------------------------------------------------------------------------------------------------------------------------------------------------------------------------------------------------------------------------------------------------------------------------------------------------------------------------------------------------------------------------------------------------------------------------|
| <p>Monitoring: keeping a “watchful eye” on families and being “a bit more vigilant”.</p> | <p>Frequently “stable at this point”.<br/>Occasionally “on the edge” families.</p> | <ul style="list-style-type: none"> <li>Using routine health-checks in children and regular consultations for health problems in parents to assess well-being of children and coping/risk factors in parents.</li> <li>Receiving information about family life and parenting from other family members during consultations, esp. grandmothers.</li> <li>Assessing the family and risk during (routine) GP post-natal home-visits.</li> <li>Checking the electronic health records for subsequent presentations to colleagues.</li> <li>Interpreting missed appointments as a possible sign of escalating problems in the family. Usually this relied on the individual practitioner but one GP was developing a practice-wide system to capture all missed primary and secondary care appointments by &lt;16s.</li> <li>Using primary care team meetings about child safeguarding to gather wider information, anticipate stressful or important points in a family’s life, such as the birth of a new baby or to gather wider information about a family. Health visitors were essential for these meetings to fulfil a monitoring function.</li> </ul> | <p>To ascertain whether or not there was relevant information that needed to be passed onto social care (in the form of a referral). Missed appointments could result in a phone call from the GP and, if necessary, a letter and/or discussion in the vulnerable families meeting.</p> | <p>When confident that the family would seek help and disclose honest information, GPs felt comfortable with the role of monitoring and risk assessment in “stable at this point” families. Honest disclosure and help-seeking behaviour in families relied on GPs being seen as a trusted ally.</p> <p>Some GPs and the health visitors recognised that GP monitoring was limited due to ‘health’ focus without wider information. GPs relied heavily on health visitors to fulfil their monitoring role.</p> |

| What                                                                                                                            | For whom                                                                                                             | How                                                                                                                                                                                                                                                                                                                                                                                                                                                                                                                                                                                    | Why                                                                                                                                                                                                                                                                                                                                                                                                                                                                                                           | Context                                                                                                                                                                                                                                                                                                          |
|---------------------------------------------------------------------------------------------------------------------------------|----------------------------------------------------------------------------------------------------------------------|----------------------------------------------------------------------------------------------------------------------------------------------------------------------------------------------------------------------------------------------------------------------------------------------------------------------------------------------------------------------------------------------------------------------------------------------------------------------------------------------------------------------------------------------------------------------------------------|---------------------------------------------------------------------------------------------------------------------------------------------------------------------------------------------------------------------------------------------------------------------------------------------------------------------------------------------------------------------------------------------------------------------------------------------------------------------------------------------------------------|------------------------------------------------------------------------------------------------------------------------------------------------------------------------------------------------------------------------------------------------------------------------------------------------------------------|
| <p>Advocating: “you’ve got to stand up and shout for people” (making a case to other agencies on the participant’s behalf).</p> | <p>Frequently “on the edge” and “was it, wasn’t it?” families.<br/>Occasionally “stable at this point” families.</p> | <ul style="list-style-type: none"> <li>Supporting requests for improved housing or benefits.</li> <li>For “on the edge” families, interceding with social care to make this agency recognise the seriousness of the family’s problems and offer (what the GPs perceived to be) a more appropriate level of service (usually child protection services).</li> <li>For “was it, wasn’t it” families, interceding with social care to reduce an unnecessarily heavy-handed or insensitive approach and encouraging these families to demonstrate cooperation with social care.</li> </ul> | <p>Improving quality of life (housing, poverty) was perceived as directly impacting on parenting and, by this route, on child welfare.</p> <p>GPs saw many “on the edge” children as in need of protection (and sometimes removal) in order to mitigate poor child outcomes.</p> <p>By encouraging compliance, GPs aimed to avoid things “getting worse” for these families with an even more coercive approach from this agency and, instead, to help the family access supportive social care services.</p> | <p>The need to intercede with social care was seen as greatest in the “on the edge” families whose children has suffered “terrible neglect” over years but where maltreatment did not pose an immediate threat to child’s physical safety and/or was not as “barn door” as some of the other types of abuse.</p> |



1  
2  
3  
4  
5  
6  
7  
8  
9  
10  
11  
12  
13  
14  
15  
16  
17  
18  
19  
20  
21  
22  
23  
24  
25  
26  
27  
28  
29  
30  
31  
32  
33  
34  
35  
36  
37  
38  
39  
40  
41  
42  
43  
44  
45  
46  
47  
48  
49

| What                                                                                                                                               | For whom                                  | How                                                                                                                                                                                                                                                                                                                                                                                                           | Why                                                                                                                                                                                                                                                                                                                                   | Context                                                                                                                                                                                                                                                                                         |
|----------------------------------------------------------------------------------------------------------------------------------------------------|-------------------------------------------|---------------------------------------------------------------------------------------------------------------------------------------------------------------------------------------------------------------------------------------------------------------------------------------------------------------------------------------------------------------------------------------------------------------|---------------------------------------------------------------------------------------------------------------------------------------------------------------------------------------------------------------------------------------------------------------------------------------------------------------------------------------|-------------------------------------------------------------------------------------------------------------------------------------------------------------------------------------------------------------------------------------------------------------------------------------------------|
| <p>Coaching: activating of parents by attempting to shift mind-set, take responsibility for their problems and, eventually, change behaviours.</p> | <p>Frequently “on the edge” families.</p> | <ul style="list-style-type: none"> <li>Talking to parents, usually the mother, to encourage them to “look at different ways of thinking about things”, such as realising “that there was actually a problem with the children” or that “stopping drinking was a good thing”.</li> <li>Talking to parents, usually the mother, to encourage them to “change their life” or “change her behaviours”.</li> </ul> | <p>A parent’s willingness or ability to recognise that there was a problem seemed to make the difference between situation perceived as hopeful and one perceived as hopeless for the family. Parental (maternal) recognition of the problem was seen as the first step in intervening to improve the situation for the children.</p> | <p>This was described as a difficult task that was often attempted but infrequently achieved.</p> <p>In order to have a hope of changing parental mind-set (and eventually behaviour), GPs saw that the parents needed to be engaged with primary care and to see the GP as a trusted ally.</p> |
| <p>Opportune healthcare: providing (missed) routine and preventive healthcare for children during consultations for other reasons.</p>             | <p>Frequently “on the edge” families.</p> | <ul style="list-style-type: none"> <li>Meeting preventive healthcare needs of the children during parent/child consultations for other reasons (e.g. overdue immunisations or developmental checks).</li> <li>This had to be done immediately as the parents could not be relied on to come back at a later date.</li> </ul>                                                                                  |                                                                                                                                                                                                                                                                                                                                       | <p>Facilitated by being able to offer something that the family wanted (leverage) such as letters to support benefits claims and easy access to a willing health visitor.</p>                                                                                                                   |

| What                                                                                                                                                                                                                                                          | For whom                                                                                                                          | How                                                                                                                                                                                                                                                                                                                                          | Why                                                                                                            | Context                                                                                                                                                                                                                                                                                                                   |
|---------------------------------------------------------------------------------------------------------------------------------------------------------------------------------------------------------------------------------------------------------------|-----------------------------------------------------------------------------------------------------------------------------------|----------------------------------------------------------------------------------------------------------------------------------------------------------------------------------------------------------------------------------------------------------------------------------------------------------------------------------------------|----------------------------------------------------------------------------------------------------------------|---------------------------------------------------------------------------------------------------------------------------------------------------------------------------------------------------------------------------------------------------------------------------------------------------------------------------|
| <p>Referral to other services</p> <p>Although there were mentions of referral to the police or to specialist child protection assessment clinics, these were rare. In contrast referral to children's social care and/or paediatric services were common.</p> | <p>Frequently "fairly straightforward" and "was it, wasn't it" families.</p> <p>Occasionally "stable at the moment" families.</p> | <p>Children's social care</p> <ul style="list-style-type: none"> <li>Immediately, decisively and directly following consultation with a child or parent.</li> <li>After using health visitor opinion or follow-up to confirm or counter GP concerns, sometimes via an additional filter of the safeguarding lead in the practice.</li> </ul> |                                                                                                                | <p>Direct referrals to social care involved certainty about physical abuse. For emotional abuse, neglect or highly uncertain physical abuse GPs used follow-up by health visitors to scale concerns up and meet thresholds for referral to children's social care or provide reassurance and decide against referral.</p> |
|                                                                                                                                                                                                                                                               | <p>"Was it, wasn't it" families.</p>                                                                                              | <p>Paediatric services:</p> <ul style="list-style-type: none"> <li>Referral to hospital paediatricians for an assessment of injuries or symptoms which might be related to physical or sexual abuse.</li> <li>Children referred to paediatric services were also simultaneously referred to children's social care by the GP.</li> </ul>     | <p>GPs sought a full assessment and documentation of child injuries or symptoms, including probable cause.</p> | <p>GPs recounted stories of how paediatrician behaviour could be insensitive to GP-family relationships and did not support or encourage future referrals.</p>                                                                                                                                                            |

1  
2  
3  
4  
5  
6  
7  
8  
9  
10  
11  
12  
13  
14  
15  
16  
17  
18  
19  
20  
21  
22  
23  
24  
25  
26  
27  
28  
29  
30  
31  
32  
33  
34  
35  
36  
37  
38  
39  
40  
41  
42  
43  
44  
45  
46  
47  
48  
49

For peer review only

## Facilitators and barriers

### *The relationship between GPs and families*

Participants described how they went out of their way and invested significant time and effort to develop trust with parents as part of their response to maltreatment-related concerns. This was the strongest and most persistent theme across the interviews. GPs described how they cultivated a position as trusted ally – a dependable professional who had a family’s best interests at heart (Box 1, quote 1). Trust and engagement were seen as necessary for monitoring maltreatment-related concerns (encouraging patients to “come through the door”, seek help with parenting and honestly disclose information) and providing coaching and advocacy (encouraging parents to be receptive to advice; Box 1, quotes 2 and 3 and Table 2). Keeping parents in contact with and engaged with General Practice was a key motivator for the participants (Box 1, quotes 4 and 5). GPs saw that it was easiest to develop trust and encourage engagement when they had something to offer the family, such as being able to meet high health need or write a letter in support of state benefits and/or housing (Box 1, quotes 6 and 7). Developing trust with parents was perceived to have potential harms as well as benefits. Several participants highlighted the potential for the child’s needs to be overlooked or the extent of the maltreatment “missed” due to a focus on parental needs and the primacy GP-parent relationship. The GPs described themselves as consciously navigating a course between benefit and harms (Box 1, quotes 8 and 9).

## Box 1: The relationship between GP and family: quotations

1  
2  
3  
4  
5  
6  
7  
8  
9  
10  
11  
12  
13  
14  
15  
16  
17  
18  
19  
20  
21  
22  
23  
24  
25  
26  
27  
28  
29  
30  
31  
32  
33  
34  
35  
36  
37  
38  
39  
40  
41  
42  
43  
44  
45  
46  
47  
48  
49  
50  
51  
52  
53  
54  
55  
56  
57  
58  
59  
60

1: "Well, I just wanted her [the mother] to know [...] there was someone steady and with their hand on the tiller." (*Participant 8; discussing 8y old*)

2: "It's [the reason to develop trust] not frightening them away because , as well, there is that kind of unseen agreement between you. She is thinking: 'if this gets a bit much for me, I might be asking you for a bit more help'. 'How will you be when I ask you for more help?' and I am thinking 'if this gets too much for you I might ask you if you need more help. I want you to be accepting of that help and not worried about it.'" (*Participant 0, discussing 4y with older siblings*)

3: "I have no teeth to then in any way punish her [the mother] or hold her otherwise to account. All I can say is I'm disappointed that you haven't done this. [...] Doctors don't go about punishing patients by and large. We rely on our encouragement and then a sort of heavy sigh and well..." (*Participant 4, discussing 2.5y old*)

4: "The way general practice is set up is, is that we respond to people who decide that they want our help. [...] You know what's come to you, but you don't know what's out there that isn't coming to you, that isn't choosing to come through the door, for whatever reason." (*Participant 7, discussing siblings aged 6y and 10y old*)

5: "[If we don't engage her] that girl will shut herself and we will not be able to get all the story from her what's happening" (*Participant 15, discussing siblings aged 9 and 11y old*)

6: "...making sure they have got the right meds, making sure that you hurry along the referrals, making sure that they are dealt with politely...." (*Participant 0, discussing 4y old with two older siblings*)

7: "because we can actually give them what they think they want but there may be a trade-off. 'I can get what I want, if I accept this.'" (*Participant 0, discussing 4y old child with two older siblings*)

8: "So I was kind of...I'm try...I'm trying to steer a line between, um, keeping her [the mother] informed and feeling I'm kind of...and not wanting to miss anything." (*Participant 8, discussing 8y old*)

9: "So it's a fine balance to make and sometimes as a professional you have to make sure everybody is safe and at the same time you keep that confidence." (*Participant 15, discussing siblings aged 9 and 11y old*)

*\*All quotations in this box are from GP participants*

### The relationship between GPs and health visitors

In all but three interviews, GPs revealed dependence on health visitors in their responses to maltreatment-related concerns and talked about this professional group far more than any other. Access to health visitor knowledge, assessments and time was seen as a necessarily facilitator of monitoring, referral to children's social care and working with children's social care (Table 2). However, the two health visitors in our sample did not see GPs as central to their safeguarding work unless there was a 'medical' element to the concern (Box 2, quotes 1 and 2). The two health visitors believed GPs had much more limited knowledge than they did (Box 2, quote 3) and were ignorant of important information, despite having regular contact with these families (Box 2, quotes 4 and 5). The health visitors viewed GPs as keen to avoid or off-load child protection work (Box 2, quotes 5 and 6). Both health visitors and GPs recognised that their relationship was undermined by the trend towards re-location of health visitors away from General Practice (Box 2, quotes 7 and 8). The responses that GPs described as reliant on health visitor input and communication should be viewed in the context of the probably imperfect and unequal relationship between the two professionals.

## Box 2: The relationship between GPs and health visitors: quotations

1  
2  
3  
4  
5  
6  
7  
8  
9  
10  
11  
12  
13  
14  
15  
16  
17  
18  
19  
20  
21  
22  
23  
24  
25  
26  
27  
28  
29  
30  
31  
32  
33  
34  
35  
36  
37  
38  
39  
40  
41  
42  
43  
44  
45  
46  
47  
48  
49  
50  
51  
52  
53  
54  
55  
56  
57  
58  
59  
60

1: Interviewer: "And how do you see, how does a GP or that GP surgery support you with what you're doing with the family?"

Respondent: "I don't know, yeah. I, I, I mean I'll ring up and I'll say I'm worried and they'll, but yeah, I don't know really." (*Participant 2, discussing siblings aged 2 and 3y old*)

2: "Unless it was a health need as in, did I see a burn on the arm, then I might [inform the GP]. But certainly if it was just emotional kind of neglect or anything like that, I wouldn't routinely phone the GP there and then to say I'd made the referral." (*Participant 16, talking generally*)

3: "Certainly in my experience I've never been informed of anything that I didn't know of via a GP." (*Participant 16, talking generally*)

4: "I don't think they were aware, and certainly weren't aware that she was going off on drinking binges and leaving the children." (*Participant 16, discussing siblings aged 3y and 7y old*)

5: "I don't think they're aware of the problems" (*Participant 1, discussing four siblings under 6y old*)

6: "...but it is worrying and it happens more often than what I think we know, that GPs avoid addressing issues." (*Participant 16, discussing siblings aged less than one year old and 2y old*)

7: "I think they're, again, a family that probably take up quite a lot of the GP's time so the GP's quite happy to sort of share it out." (*Participant 1, discussing four siblings under 6y old*)

8: "I think ultimately being based in the same building, seeing people day to day, you know in the kitchen, putting the kettle on, that kind of daft thing does build a good relationship" (*Participant 16, discussing siblings aged 3y and 7y old*)

*\*All quotations in this box are from the two health visitor participants*

### Relationships between GPs and other professionals

In comparison to their description of working with health visitors, GPs gave relatively little detail about how relationships with other professionals helped or hindered their responses. GPs wished to be seen as separate from children's social care and paediatric services, which they thought patients saw as punitive and policing (Box 3, quotes 1-3). Both services were perceived to be insensitive to the GP's position: social care did not provide necessary feedback to the GP (Box 3, quote 4) and paediatric services could unthinkingly and unnecessarily damage hard-earned GP-patient relationships (Box 3, quote 5). The one-way flow of information share with children's social care was seen to be exacerbated by lack of personal relationships between GPs and social workers and high staff turn-over within children's social care. In the case of paediatric services, GPs were able to draw on personal contacts to deliberately seek out trusted paediatricians (Box 3, quote 6).



## Box 3: GPs and other professionals: quotations

1  
2  
3  
4  
5  
6  
7  
8  
9  
10  
11  
12  
13  
14  
15  
16  
17  
18  
19  
20  
21  
22  
23  
24  
25  
26  
27  
28  
29  
30  
31  
32  
33  
34  
35  
36  
37  
38  
39  
40  
41  
42  
43  
44  
45  
46  
47  
48  
49  
50  
51  
52  
53  
54  
55  
56  
57  
58  
59  
60

1: "I think a lot of people view social services as their only job is to take children away." (*Participant 13, discussing unborn child*)

2: "she [the paediatrician] is seen as just there to check up on you." (*Participant 0, discussing 13m old child*)

3: "that can affect your relationship with the patient because then they lump you with social services and see you as part of the people trying to take away their child." (*Participant 13, discussing unborn child*)

4: "You don't get information from social services. They don't let you know, unless there happens to be a reason for them ringing because they want information from us." (*Participant 7, discussing unborn child*)

5: "They saw a general paediatrician, he just thought it was rough play and he didn't see why on earth I'd sent them along, which completely undermined our position. The last thing we needed was to get a secondary care response that did that because it then became more difficult to engage them at a child in need level because it's much more voluntary, isn't it?" (*Participant 5, discussing three siblings aged between 5m and 3y old*)

6: "So I think that would – that's – I think it's very important that as clinicians we sit and talk to each other about who we trust and who we don't trust in secondary care as well." (*Participant 2, talking generally*)

*\*All quotations in this box are from GP participants*

### **“A very medical role”**

Just as the two health visitors confined the GPs role to a “medical” one, so the GPs in the sample framed their responses as “medical”. Framing of responses and problems as “medical” was one way that the GPs justified and legitimised their on-going involvement with families who had known maltreatment-related problems. In this way the medicalization of maltreatment-related concerns and responses acted as a facilitator of GP action.

On-going involvement with the maltreatment-related concerns was justified first and foremost in terms of high medical need in the families (Box 4, quote 1). Several GPs stated or implied that contact with families for maltreatment-related concerns in the absence of “medical” need was not a legitimate part of the GP’s role (Box 4, quote 2). The theoretical distinction between “medical” and “social” problems was used by participants to delineate where the GP could legitimately be involved with maltreatment-related concerns. However, elsewhere in the interviews, this neat distinction was challenged. “On the edge” families were described as presenting indiscriminately with health and social welfare need (Box 4, quote 3) and one participant described how the complex mix of family need forced her to step into multiple roles, some of which were perceived to be contested (Box 4, quote 4). The extent and nature of the GP role was a difficult and slippery concept for the GP participants.

Figure 1 summarises the relationship between the families that GPs described responding to, the actions they described taking and the important barriers and facilitators that helped or hindered these responses.

## Box 4: GPs and other professionals: quotations

1  
2  
3  
4  
5  
6  
7  
8  
9  
10  
11  
12  
13  
14  
15  
16  
17  
18  
19  
20  
21  
22  
23  
24  
25  
26  
27  
28  
29  
30  
31  
32  
33  
34  
35  
36  
37  
38  
39  
40  
41  
42  
43  
44  
45  
46  
47  
48  
49  
50  
51  
52  
53  
54  
55  
56  
57  
58  
59  
60

1: Interviewer: "And what do you think is your role as a GP for them?"

Respondent: "Well, I...I...I think that we'll always have a very medical role for this family. They're very...they have very great medical needs so they...that's kind of...although it's difficult, is the relatively easy bit. I mean, how we tap into the sort of welfare issues of families and children, I think is, um, much more difficult, much more difficult." (*Participant 5, discussing 4y old with four siblings*)

2: "...arranging follow up for the purposes of reviewing concerns around umm, safeguarding, I wouldn't see as part of our role." (*Participant 7, discussing siblings aged 6 and 10y*)

3: "They used to come for their medications. They used to come for all these letters for Social Services, letters for something, housing, benefit or something or something." (*Participant 15, discussing 2y old*)

4: "... maybe we should just be saying, well, I'm sorry, but there's nothing I can do or, you know, I am the GP, I'm not the social worker. If she's not going to school, you know, you'll have to phone social services or somebody else who can do this, because that's not my job. And maybe we sort of just blurred boundaries too much by taking on work that possibly isn't really appropriate for us to do." (*Participant 10, discussing three siblings aged between 9y and 16y old*)

*\*All quotations in this box are from GP participants*

## DISCUSSION

### Summary of findings

GPs described being actively involved with the management of (possible) child neglect and emotional abuse and much of their response was aimed at the parents or the whole family. GPs described seven important responses: monitoring, advocating, coaching, providing opportune healthcare, referring to other services, working with other services and recording. Three main facilitators emerged from the data. First, help-seeking behavior and honest disclosure from parents was deliberately encouraged by the GPs who described significant effort in establishing a trusting and reciprocal relationship. Parental engagement with General Practice and help-seeking behaviour was seen as necessary for GP responses to have any chance of changing parental mindset or behaviour and thereby improving circumstances for the child. Secondly, information and support from health visitors, which was threatened by mismatched expectations and relocation of health visitors. Thirdly, conceptualization of the problem and the response as “medical”, which permitted and justified GP involvement. GPs saw some limitations of the way that they responded including: working within a reactive system, potentially prioritizing the needs of the parent over those of the child or “missing” things.

This study describes responses that are feasible where there is some expertise and interest within General Practice. Despite our case-based approach and although accounts were detailed, candid and included emotion and uncertainty, it is possible that some GPs recounted what they thought they *should have done* rather than what they actually did. This study was not designed to quantify how far the family types represent maltreatment-related concerns among all GPs in England but the families described by our participants are likely to be familiar within General Practice. Descriptions of “on the edge” and “stable at this point families” were compatible with other descriptions of families and adults with social welfare problems in this setting.<sup>26</sup> “On the edge” narratives resonated with another well-known presentation: the “heart-sink” patient. “Heart-sink” patients have been described as those whose chronic and

1  
2  
3 multiple problems cannot be cured or solved and which evoke exasperation, defeat  
4 and helplessness in the GP.<sup>27 28</sup>  
5  
6

7  
8 Equally, although we do not know how far the seven responses are being used in  
9 General Practice more widely, they do reflect core GP skills. Monitoring, which can also  
10 been termed review or “watchful waiting” is a substantial part of GP practice and has  
11 been used as part of proactive management for other groups who present with a  
12 mixture of social and welfare problems, such as the frail elderly.<sup>29</sup> Acting as an  
13 advocate to help patients access and navigate services within and beyond the NHS  
14 constitutes part of managing chronic health conditions in General Practice and is  
15 expected by patients.<sup>30 31-33</sup>  
16  
17

18  
19 Coaching incorporates elements common to promoting “self-management” of chronic  
20 disease and “motivational interviewing”, in which professionals attempt to activate the  
21 response from patients by encouraging them to take responsibility for their own  
22 health.<sup>34</sup> Providing opportune healthcare as a routine part of consultations has been  
23 long considered a fundamental part of the GP consultation.<sup>35</sup> Feedback from  
24 participants on provisional results supported the interpretation of monitoring,  
25 advocating, coaching and opportune healthcare as core GP work. Several GPs stated  
26 they would use these skills more widely, specifically for patients with cancer or multi-  
27 morbidities.  
28  
29

30  
31 In summary, responses to maltreatment-related concerns can be located as an  
32 extension of ‘normal’ GP work rather than an isolated or peripheral part of their  
33 professional activity. This was explicitly recognised by some of the GPs in our sample  
34 and by some of the GPs in the mixed methods study by Tompsett et al.<sup>20</sup>  
35  
36

37  
38 The findings of our study confirm those from the only other empirical study on  
39 responses to maltreatment-related concerns by GPs in England.<sup>20</sup> In this study,  
40 Tompsett et al. outlined four roles that the GP was perceived to play and three of  
41 them overlap substantially with findings from our study. The “case holder” role was  
42 similar to the role that the GPs in our sample described for “on the edge” and “stable  
43 at this point” families. Like our study, the Tompsett et al. study suggests that GPs  
44 might have the biggest role to play for children with chronic neglect, that GPs feel the  
45  
46  
47  
48  
49  
50  
51  
52  
53  
54  
55  
56  
57  
58  
59  
60

1  
2  
3 need to keep their involvement within a “medical” sphere, that health visitors are a  
4 key professional in GP’s safeguarding responses, and that building rapport with  
5 parents and providing follow-up are good practice strategies in this area.<sup>20</sup> The study  
6 by Tompsett et al. and other qualitative studies also report that GP responses to social  
7 welfare concerns in children, including concerns about child abuse or neglect, are  
8 often aimed at parents.<sup>17-20</sup> Table three describes how our findings confirm and extend  
9 Tompsett et al’s work by a) providing a detailed description of the monitoring,  
10 coaching, advocating and providing opportunistic preventive healthcare that were part  
11 of their “case-holder” role and b) by suggesting that the four roles are differentially  
12 adopted according to how family problems are understood by the GP (i.e. according to  
13 family type). Our results provide a sufficiently high level of detail about GP *actions* and  
14 their context that they can be used as a starting point to develop relevant  
15 interventions.  
16  
17  
18  
19  
20  
21  
22  
23  
24  
25  
26  
27  
28  
29  
30  
31  
32  
33  
34  
35  
36  
37  
38  
39  
40  
41  
42  
43  
44  
45  
46  
47  
48  
49  
50  
51  
52  
53  
54  
55  
56  
57  
58  
59  
60

1  
2  
3  
4  
5  
6  
7  
8  
9  
10  
11  
12  
13  
14  
15  
16  
17  
18  
19  
20  
21  
22  
23  
24  
25  
26  
27  
28  
29  
30  
31  
32  
33  
34  
35  
36  
37  
38  
39  
40  
41  
42  
43  
44  
45  
46  
47  
48  
49

Table 3: Comparison of our findings with study by Tompsett et al.<sup>20</sup>

| Four roles outlined by Tompsett et al                                                                                                                                                                                                                                                                                           | Relevant findings from our study                                                                                                                                                                                                                                                                                                                          |                                                                                                                                                                                                                                                                                                                                                                                                                                                                                                                                                                                                                                                                                                                                                                                                                                                                                                                                                                                                                      |
|---------------------------------------------------------------------------------------------------------------------------------------------------------------------------------------------------------------------------------------------------------------------------------------------------------------------------------|-----------------------------------------------------------------------------------------------------------------------------------------------------------------------------------------------------------------------------------------------------------------------------------------------------------------------------------------------------------|----------------------------------------------------------------------------------------------------------------------------------------------------------------------------------------------------------------------------------------------------------------------------------------------------------------------------------------------------------------------------------------------------------------------------------------------------------------------------------------------------------------------------------------------------------------------------------------------------------------------------------------------------------------------------------------------------------------------------------------------------------------------------------------------------------------------------------------------------------------------------------------------------------------------------------------------------------------------------------------------------------------------|
|                                                                                                                                                                                                                                                                                                                                 | Similarities                                                                                                                                                                                                                                                                                                                                              | What our study adds                                                                                                                                                                                                                                                                                                                                                                                                                                                                                                                                                                                                                                                                                                                                                                                                                                                                                                                                                                                                  |
| <p><b>1. The case holder:</b><br/>GP has on-going relationship with family before, during and after referral to children’s social care. This role builds on voluntary disclosure and establishing trust over time with the parents. This role was clearly identified by GPs but not recognised so much by the stakeholders.</p> | <p>Comparable to the role that GPs in the sample described in relation to ‘stable at this point’, ‘on the edge’ and ‘was it, wasn’t it?’ families, both in the on-going nature of the relationship with families and in the reliance on voluntary disclosure and trust by parents. This was the most commonly described role by the GPs in my sample.</p> | <p>This role might be performed most commonly where:</p> <ul style="list-style-type: none"> <li>• Families had multiple health problems (including those caused by child neglect) which: <ul style="list-style-type: none"> <li>○ Provided a reason for repeated contact</li> <li>○ Legitimised GP intervention in child safeguarding concerns</li> <li>○ Offered opportunity for establishing trust and reciprocity and encourage help-seeking behaviours by meeting high need</li> </ul> </li> <li>• GPs perceived that social care was not/not likely to offer appropriate services</li> <li>• GPs could construct concerns as due to “incompetent” (rather than “malicious” parenting) which allowed sympathy with the parents and facilitated on-going GP involvement.</li> </ul> <p>These factors were typical of families who prompted concerns about chronic <i>neglect</i>.</p> <p>The ‘case-holder’ role also included monitoring, coaching, advocating and providing opportune preventive healthcare.</p> |

| Four roles outlined by Tompsett et al                                                                                                                                                                                    | Relevant findings from our study                                                                                                                                             |                                                                                                                                                                                                                                                                                                                        |
|--------------------------------------------------------------------------------------------------------------------------------------------------------------------------------------------------------------------------|------------------------------------------------------------------------------------------------------------------------------------------------------------------------------|------------------------------------------------------------------------------------------------------------------------------------------------------------------------------------------------------------------------------------------------------------------------------------------------------------------------|
|                                                                                                                                                                                                                          | Similarities                                                                                                                                                                 | What our study adds                                                                                                                                                                                                                                                                                                    |
| <p><b>2. The sentinel:</b><br/>GP identifies child maltreatment and refers the concern to social care or other health services.</p>                                                                                      | <p>Comparable to the role for families with 'fairly straightforward' concerns (infrequently described). Here concerns were referred onwards with no further involvement.</p> | <p>This role might be performed most commonly where:</p> <ul style="list-style-type: none"> <li>• GPs perceived that other agencies responded (or would respond) appropriately.</li> </ul> <p>This was typically in cases of concerns about <i>physical abuse</i> or, less frequently, an episode of acute neglect</p> |
| <p><b>3. The gatekeeper:</b><br/>GP provides information to other agencies so that those agencies can make decisions about access to services.</p>                                                                       | <p>This role was not directly comparable to any described by the GPs in the sample.</p>                                                                                      | <p>The GPs did offer information to social care, especially for "stable at this point" families. However, this information was unprompted and resulted from on-going monitoring and risk assessment for families with a history of very serious child-maltreatment concerns who had achieved a fragile stability.</p>  |
| <p><b>4. Multi-agency team player:</b><br/>GP has continued engagement with other professionals outside the practice. This role is fulfilled when GP contributes actively to social care child protection processes.</p> | <p>Comparable to the few instances in which GPs described working with social care and actively participating in their child protection processes.</p>                       | <p>This role might be performed most commonly where:</p> <ul style="list-style-type: none"> <li>• GPs knew the families well and did not trust social care to offer appropriate services<br/>AND</li> <li>• GPs perceive that there were medical issues giving them a unique medical perspective</li> </ul>            |



1  
2  
3 The GPs in our sample saw the potential for both benefit and harm in their approach  
4 to maltreatment-related concerns. Many of these overlap with the benefits and harms  
5 which have been attributed to the GP-patient relationship not just in the study by  
6  
7  
8  
9  
10  
11  
12  
13  
14  
15  
16  
17  
18  
19  
20  
21  
22  
23  
24  
25  
26  
27  
28  
29  
30  
31  
32  
33  
34  
35  
36  
37  
38  
39  
40  
41  
42  
43  
44  
45  
46  
47  
48  
49  
50  
51  
52  
53  
54  
55  
56  
57  
58  
59  
60

The GPs in our sample saw the potential for both benefit and harm in their approach to maltreatment-related concerns. Many of these overlap with the benefits and harms which have been attributed to the GP-patient relationship not just in the study by Tompsett et al. about child maltreatment but also in qualitative studies about the management of chronic conditions. A trusting and constant doctor-patient relationship has been seen by both doctors and patients as facilitating honest disclosure of hardships (such as domestic violence and past abuse), to help patients cope with these issues,<sup>36</sup> to offer GPs a mechanism for changing patient attitudes and behavior,<sup>34 36</sup> and, to be a way of helping the child when the principle patient is the parent.<sup>20</sup> However, GPs also agree that if the relationship is not sufficiently strong, attempting to “coach” patients might scare them away from using services<sup>34</sup> and a dysfunctional doctor-patient relationship might promote tolerance of “bad” behavior by doctors or may make GPs more likely to miss new and serious symptoms.<sup>36 37</sup> GPs have previously recognized that building relationships with parents may come at the cost of overlooking the child’s needs.<sup>20</sup> Analyses of maltreatment-related child deaths suggest that therapeutic relationships can be very dangerous for the child if professionals do not recognise disguised compliance (apparent co-operation by parents to diffuse professional intervention) or if empathy with parents is accompanied by “silo” working (failure to look at a child’s needs outside of their own specific brief).<sup>38</sup>

The GPs in our sample described how they sought to establish a trusting relationship with the families to encourage engagement with General Practice, disclosure of difficulties and acceptance of help and advice. We did not seek the views or experiences of parents and children. However, there is considerable evidence from other qualitative studies that families perceive GPs as dismissive, unapproachable and/or judgmental,<sup>39 40</sup> are reluctant to confide in the GP<sup>41</sup> or to present<sup>42</sup> and perceive their relationship with the GP to be meaningless or non-existent.<sup>20</sup> If the families described in our sample had a similarly negative perception of the GP service, this would undermine any credible chance that the seven actions could work in the way that the GPs hoped. It is also possible that further responses might be identified in different sample of GPs.

1  
2  
3 The perspectives and experiences of parents and children are an important avenue for  
4 future research. Although there was substantial overlap between our findings and  
5 those from the only other empirical study about GPs and wider responses to  
6 maltreatment-related concerns, it would be helpful to repeat our study in a different  
7 sample of GPs to identify any additional responses. Future studies are needed to  
8 evaluate the impact of the responses we have identified on children and families who  
9 prompt maltreatment-related concerns in General Practice. Such studies should take  
10 into account the considerable skill required to use the therapeutic relationship for  
11 monitoring and coaching, the potential for more harm than good and that the  
12 responses may only be considered acceptable for concerns about neglect or emotional  
13 abuse and/or feasible for a subset of help-seeking families.<sup>38</sup>  
14  
15  
16  
17  
18  
19  
20  
21  
22

### 23 **Implications**

- 24  
25  
26 • Policy and research focus should be broadened to include direct intervention  
27 by GPs for families who prompt maltreatment-related concerns, as well as GP  
28 referral to children's social care and participation in social care processes. The  
29 actions we identified provide detailed exemplars of direct intervention.  
30  
31
- 32  
33 • A shift in thinking to incorporate core GP skills such as advocating, coaching and  
34 providing opportune healthcare into "safeguarding" activity make this work  
35 more central and relevant to GPs who do not consider themselves to have  
36 specialist expertise in this area. It is, however, also possible that labelling this  
37 work as "safeguarding" might make it more difficult for GPs to respond.  
38  
39
- 40  
41 • As the responses represent core skills and activities of General Practice which  
42 are used for other patient groups, there is likely to be significant existing skill  
43 within General Practice. However, it is possible that GPs more generally might  
44 not have the time or inclination to use these skills in relation to maltreatment-  
45 related concerns.  
46  
47
- 48  
49 • Our study suggests that the GP might be a very important professional for  
50 families who present regularly to General Practice with high health need. GPs  
51 might be able to impact on child outcomes through treating health needs of the  
52 parents and building a therapeutic relationship with the parents. We do not  
53  
54  
55  
56  
57  
58  
59  
60

1  
2  
3 know what proportion of families with maltreatment-related concerns fit this  
4 description.  
5

- 6  
7  
8  
9  
10  
11  
12  
13  
14  
15  
16  
17  
18  
19  
20  
21  
22  
23  
24  
25  
26  
27  
28  
29  
30  
31  
32  
33  
34  
35  
36  
37  
38  
39  
40  
41  
42  
43  
44  
45  
46  
47  
48  
49  
50  
51  
52  
53  
54  
55  
56  
57  
58  
59  
60
- Funding is needed to develop a model of response to child maltreatment in General Practice which incorporates the seven responses we identified (as well as any additional responses from future studies). Any such model must prioritise the therapeutic relationship and establish genuine help-seeking behaviour in parents, whilst also recognising the potential harms of this approach. Concerns about discouraging families from presenting to health care services should be taken seriously. This research will also be pertinent to developing the role of “lead professional” for GPs.
  - Models of GP practice in relation to child maltreatment must be rigorously evaluated for efficacy, safety and cost.

1  
2  
3  
4  
5  
6  
7  
8  
9  
10  
11  
12  
13  
14  
15  
16  
17  
18  
19  
20  
21  
22  
23  
24  
25  
26  
27  
28  
29  
30  
31  
32  
33  
34  
35  
36  
37  
38  
39  
40  
41  
42  
43  
44  
45  
46  
47  
48  
49  
50  
51  
52  
53  
54  
55  
56  
57  
58  
59  
60

For peer review only

1  
2  
3  
4  
5  
6  
7  
8  
9  
10  
11  
12  
13  
14  
15  
16  
17  
18  
19  
20  
21  
22  
23  
24  
25  
26  
27  
28  
29  
30  
31  
32  
33  
34  
35  
36  
37  
38  
39  
40  
41  
42  
43  
44  
45  
46  
47  
48  
49  
50  
51  
52  
53  
54  
55  
56  
57  
58  
59  
60

**Legend for Figures**

Figure 1: To whom were GPs responding to, what actions did they take and what were the facilitators and barriers of these actions?

For peer review only

**Data sharing statement**

No additional data is available.

**Ethics**

Ethical approval for the interviews and observations was given by Central London 1 NHS Research Ethics Committee on the 8<sup>th</sup> October 2010 (Reference 10/H0718/6).

**Acknowledgements**

We would like to thank the professionals who gave up their valuable time to make this study possible.

**Contributorship**

JW designed the study, conducted the interviews, analysed and interpreted data. She is guarantor. RG and MB designed the study, supervised analyses and contributed to the writing of the paper. DG and JA contributed to the design of the study, interpretation of findings and contributed to the writing of the paper. For ethical reasons only JW, RG and MB had had full access to the data in the study. They take responsibility for the integrity of the data and the accuracy of the data analysis.

**Competing interest**

No competing interests stated.

**Funding**

JW was funded by an MRC/ESRC interdisciplinary PhD studentship. The funders did not have any role in study design; analysis or interpretation of data; in the writing of the report; or in the decision to submit the article for publication. RG is an investigator with the Farr Institute of Health Informatics Research @ UCL Partners.

**Exclusive license statement**

"I, *Jenny Woodman*, The Corresponding Author of this article contained within the original manuscript which includes any diagrams & photographs within and any related

1  
2  
3 or stand alone film submitted (the Contribution”) has the right to grant on behalf of all  
4 authors and does grant on behalf of all authors, a licence to the BMJ Publishing Group  
5 Ltd and its licencees, to permit this Contribution (if accepted) to be published in the  
6 BMJ and any other BMJ Group products and to exploit all subsidiary rights, as set out in  
7 our licence set out at: [http://www.bmj.com/about-bmj/resources-authors/forms-](http://www.bmj.com/about-bmj/resources-authors/forms-policies-and-checklists/copyright-open-access-and-permission-reuse)  
8 [policies-and-checklists/copyright-open-access-and-permission-reuse.](http://www.bmj.com/about-bmj/resources-authors/forms-policies-and-checklists/copyright-open-access-and-permission-reuse)”  
9  
10  
11  
12  
13  
14  
15  
16  
17  
18  
19  
20  
21  
22  
23  
24  
25  
26  
27  
28  
29  
30  
31  
32  
33  
34  
35  
36  
37  
38  
39  
40  
41  
42  
43  
44  
45  
46  
47  
48  
49  
50  
51  
52  
53  
54  
55  
56  
57  
58  
59  
60

For peer review only

1. Radford L, Corral S, Bradley C, et al. *Child abuse and neglect in the UK today*. London: NSPCC, 2011.
2. Gilbert R, Kemp A, Thoburn J, et al. Recognising and responding to child maltreatment. *Lancet* 2009;373(9658):167-80.
3. HM Government. *Working together to safeguard children: a guide to inter-agency working to safeguarding and promoting the welfare of children*, 2013.
4. Gilbert R, Widom CS, Browne K, et al. Burden and consequences of child maltreatment in high-income countries. *Lancet* 2009;373(9657):68-81.
5. Woodman J, Freemantle N, Allister J, et al. Variation in recorded child maltreatment concerns in UK primary care records: a cohort study using The Health Improvement Network (THIN) database. *PLOS ONE* 2012;7(11):1-9.
6. Woodman J, Allister J, Rafi I, et al. Simple approaches to improve recording of concerns about child maltreatment in primary care records: developing a quality improvement intervention. *Br J Gen Pract* 2012;62(600):e478-e86(9).
7. Daniel B, Taylor J, Scott J. *Noticing and helping the neglected child*. London, 2009.
8. Brandon MA M, Lewis BA A, Thoburn LittD J. The Children Act definition of 'significant harm'—interpretations in practice. *Health & Social Care in the Community* 1996;4(1):11-20.
9. Holmes L, McDermid S, Soper J, et al. Extension of the cost calculator to include cost calculations for all Children in Need. A report to Department for Education. . Loughborough, 2010.
10. Broadhurst K, Wastell D, White S, et al. Performing 'initial assessment': identifying the latent conditions for error at the front-door of local authority children's services. *Brit J Soc Work* 2010;40(2):352-70.
11. National Society for the Prevention of Cruelty to Children, Royal College of General Practitioners. *Safeguarding children and young people: A toolkit for general practice*. London: RCGP, 2011.
12. National Institute for Health and Clinical Excellence. *When to suspect maltreatment*. London: NICE, 2009.
13. General Medical Council. *Protecting children and young people: the responsibilities of all doctors*. London: GMC, 2012.
14. Daniel B, Taylor J, Scott J. Recognition of neglect and early response: overview of a systematic review of the literature. *Child Fam Soc Work* 2010;15(2):248-57.
15. Simpson CM, Simpson RJ, Power KG, et al. GPs' and health visitors' participation in child protection case conferences. *Child Abuse Review* 1994;3(3):211-30.
16. Polnay JC. General practitioners and child protection case conference participation: reasons for non-attendance and proposals for a way forward. *Child Abuse Review* 2000;9(2):108-23.
17. Lykke K, Christensen P, Reventlow S. The consultation as an interpretive dialogue about the child's health needs. *Fam Pract* 2011;0:1-7.
18. Lykke K, Christensen P, Reventlow S. "This is not normal ... "--signs that make the GP question the child's well-being. *Fam Pract* 2008;25(3):146-53.
19. Hølge-Hazelton B, Tulinius C. Beyond the specific child What is 'a child's case' in general practice? *Br J Gen Pract* 2010;60(570):e4.
20. Tompsett H, Ashworth M, Atkins C, et al. *The child, the family and the GP: tensions and conflicts of interest for GPs in safeguarding children May 2006-October 2008 Final report February 2010*. London: Kingston University, 2010.
21. Pope C, Mays N. Reaching the parts other methods cannot reach: an introduction to qualitative methods in health and health services research. *BMJ* 1995;311(6996):42.
22. Green J, Thorogood N. *Qualitative methods for health research*. 2nd Edition ed: Sage Publications Ltd, 2009.
23. Liamputtong Rice P, Ezzy D. *Qualitative research methods: A health focus*. Victoria, Australia:: Oxford University Press, 1999.
24. West P. The status and validity of accounts obtained at interview: A contrast between two studies of families with a disabled child. *Soc Soc Med* 1990;30(11):1229-39.



- 1
- 2
- 3 25. Braun V, Clarke V. Using thematic analysis in psychology. *Qualitative research in psychology*
- 4 2006;3(2):77-101.
- 5 26. Popay J, Kowarzik U, Mallinson S, et al. Social problems, primary care and pathways to help and
- 6 support: addressing health inequalities at the individual level. Part I: the GP perspective. *J*
- 7 *Epidemiol Community Health* 2007;61(11):966-71.
- 8 27. O'Dowd TC. Five years of heartsink patients in general practice. *BMJ* 1988;297(6647):528-30.
- 9 28. Butler CC, Evans M. The 'heartsink' patient revisited. The Welsh Philosophy And General Practice
- 10 discussion Group. *Br J Gen Pract* 1999;49(440):230-3.
- 11 29. Sheaff R, Boaden R, Sargent P, et al. Impacts of case management for frail elderly people: a
- 12 qualitative study. *J Health Serv Res Policy* 2009;14(2):88-95.
- 13 30. Hanks H, Veitch C, Harris M. Colorectal cancer management - the role of the GP. *Aust Fam*
- 14 *Physician* 2008;37(4):259-61.
- 15 31. Lester H, Khan N, Jones P, et al. Service users' views of moving on from early intervention
- 16 services for psychosis: a longitudinal qualitative study in primary care. *Br J Gen Pract*
- 17 2012;62(596):e183-90.
- 18 32. Popay J, Kowarzik U, Mallinson S, et al. Social problems, primary care and pathways to help and
- 19 support: addressing health inequalities at the individual level. Part II: lay perspectives.
- 20 *Journal of Epidemiology and Community Health* 2007;61(11):972-77.
- 21 33. Greenhalgh T, Robb N, Scambler G. Communicative and strategic action in interpreted
- 22 consultations in primary health care: a Habermasian perspective. *Soc Sci Med*
- 23 2006;63(5):1170-87.
- 24 34. Blakeman T, Bower P, Reeves D, et al. Bringing self-management into clinical view: a qualitative
- 25 study of long-term condition management in primary care consultations. *Chronic Illn*
- 26 2010;6(2):136-50.
- 27 35. Stott NC, Davis RH. The exceptional potential in each primary care consultation. *J R Coll Gen*
- 28 *Pract.* 1979;29(201):201-5.
- 29 36. Cocksedge S, Greenfield R, Nugent GK, et al. Holding relationships in primary care: a qualitative
- 30 exploration of doctors' and patients' perceptions. *Br J Gen Pract* 2011;61(589):e484-91.
- 31 37. Chew-Graham CA, May CR, Roland MO. The harmful consequences of elevating the doctor-
- 32 patient relationship to be a primary goal of the general practice consultation. *Fam Pract*
- 33 2004;21(3):229-31.
- 34 38. Brandon M. Understanding Serious Case Reviews and their Impact: A biennial analysis of serious
- 35 case reviews 2005-07. London, 2009.
- 36 39. Boddy J, Statham J, Warwick I, et al. Health Related Work in Family Intervention Projects.
- 37 London, 2012.
- 38 40. Biddle L, Donovan JL, Gunnell D, et al. Young adults' perceptions of GPs as a help source for
- 39 mental distress: a qualitative study. *Br J Gen Pract* 2006;56(533):924.
- 40 41. Tait L. To disclose or not to disclose psychological problems to GPs. *Br J Gen Pract*
- 41 2009;59(566):638.
- 42 42. Canvin K, Jones C, Marttila A, et al. Can I risk using public services? Perceived consequences of
- 43 seeking help and health care among households living in poverty: qualitative study. *J*
- 44 *Epidemiol Community Health* 2007;61(11):984-9.
- 45
- 46
- 47
- 48
- 49
- 50
- 51
- 52
- 53
- 54
- 55
- 56
- 57
- 58
- 59
- 60

1  
2  
3 **Responses to concerns about child maltreatment: a qualitative study of GPs**  
4 **in England**  
5  
6

7 Jenny Woodman, Ruth Gilbert, Janice Allister, Danya Glaser, Marian Brandon  
8  
9

10 MRC Centre of Epidemiology for Child Health, UCL-Institute of Child Health,  
11 London WC1N 1EH  
12 Research student  
13

14 MRC Centre of Epidemiology for Child Health, UCL-Institute of Child Health,  
15 London WC1N 1EH  
16 Professor of Clinical Epidemiology  
17  
18

19 Royal College of General Practitioners, 30 Euston Square, London, NW1 2FB  
20 Child Health Representative  
21  
22

23 Great Ormond Street Hospital for Children NHS Foundation Trust London  
24 WC1N 3JH  
25 Hon Consultant Child and Adolescent Psychiatrist  
26  
27

28 Centre for Research on Children and Families, Elizabeth Fry Building,  
29 University of East Anglia, Norwich, NR4 7TJ  
30 Professor of Social Work  
31  
32

33  
34 Correspondence to: Jenny Woodman [j.woodman@ucl.ac.uk](mailto:j.woodman@ucl.ac.uk) or  
35 [jenny.woodman@gmail.com](mailto:jenny.woodman@gmail.com)  
36  
37  
38  
39  
40  
41  
42  
43  
44  
45  
46  
47  
48  
49  
50  
51  
52  
53  
54  
55  
56  
57  
58  
59  
60

1  
2  
3 **Key words:** child maltreatment, primary care, GP, responses, qualitative  
4

5 **ABSTRACT**  
6

7  
8 **Objectives:** To provide a rich description of current responses to concerns related to  
9 child maltreatment among a sample of English GPs.  
10

11  
12 **Design:** In-depth, face-to-face interviews (November 2010 to September 2011).  
13

14 Participants selected and discussed families who had prompted “maltreatment-related  
15 concerns”. Thematic analysis of data.  
16

17  
18 **Setting:** 4 General Practices in England.  
19

20  
21 **Participants:** 14 GPs, 2 practice nurses and 2 health visitors from practices with at least  
22 one ‘expert’ GP (expertise in child safeguarding/protection).  
23

24  
25 **Results:** Concerns about neglect and emotional abuse dominated the interviews. GPs  
26 described intense and long-term involvement with families with multiple social and  
27 medical problems. Narratives were distilled into seven possible actions that GPs took  
28 in response to maltreatment-related concerns. These were orientated towards whole  
29 families (monitoring and advocating), the parents (coaching), and children (opportune  
30 healthcare), and included referral to or working with other services and recording  
31 concerns. Facilitators of the seven actions were: trusting relationships between GPs  
32 and parents, good working relationships with health visitors and framing the  
33 problem/response as “medical”. Narratives indicated significant time and energy spent  
34 building facilitating relationships with parents with the aim of improving the child’s  
35 well-being.  
36  
37  
38  
39  
40  
41  
42  
43  
44  
45

46  
47 **Conclusions:** These GPs used core General Practice skills for on-going management of  
48 families who prompted concerns about neglect and emotional abuse. Policy and  
49 research focus should be broadened to include strategies for direct intervention and  
50 on-going involvement by GPs, such as using their core skills during consultations and  
51 practice systems for monitoring families and encouraging presentation to General  
52 Practice. Exemplars of current practice, such those identified in our study, should be  
53 evaluated for feasibility and acceptability in representative General Practice settings as  
54  
55  
56  
57  
58  
59  
60

1  
2  
3 well as tested for efficacy, safety and cost. The seven actions could form the basis for  
4 the “lead professional” role in General Practice as proposed in the 2013 version of  
5 “Working Together ”guidance.  
6  
7  
8  
9  
10  
11  
12  
13  
14  
15  
16  
17  
18  
19  
20  
21  
22  
23  
24  
25  
26  
27  
28  
29  
30  
31  
32  
33  
34  
35  
36  
37  
38  
39  
40  
41  
42  
43  
44  
45  
46  
47  
48  
49  
50  
51  
52  
53  
54  
55  
56  
57  
58  
59  
60

For peer review only

## STUDY SUMMARY

### Article focus

- We aimed to generate hypotheses about how GPs in England might feasibly respond to maltreatment-related concerns in children and families.
- We were interested in a range of responses including, but not limited to, referral to children's social care.

### Key messages

- This study identified seven actions in response to maltreatment-related concerns. These actions reflect core skills and activities of General Practice but might only be feasible for a subset of help-seeking families with possible neglect.
- Robust therapeutic relationships with families, working relationships with health visitors and framing the response as "medical" were identified as necessary facilitators of these actions.
- Potential benefits and harms of these responses were identified by participants. These responses need to be properly evaluated in terms of cost and impact on children and families.

### Strengths / limitations

- This study generated hypotheses about responses that were feasible in English practices with some expertise and interest.
- Participant accounts were detailed and candid and findings resonate with other research in General Practice settings.
- Due to a small and non-random sample, results cannot be generalised to all General Practices in England. Although our results confirm those from other studies, it would be helpful for a similar study to be undertaken with a different sample in order to identify any additional responses.

## INTRODUCTION

Child maltreatment (abuse or neglect) is common, affecting at least 4% of all children in England each year.<sup>1,2</sup> All healthcare professionals have a statutory duty to protect children from child maltreatment.<sup>3</sup> GPs are uniquely placed to respond because they offer services to the whole family often over many years, manage parental problems that put children at risk of child maltreatment, such as mental health and substance misuse<sup>4</sup> and are skilled in fostering relationships, which constitute an important element of social welfare interventions. Although identification could undoubtedly be improved, GPs in England already record maltreatment-related problems in at least 1% of all children registered with them.<sup>5</sup> The true figure for children who raise concerns for GPs is likely to be far higher.<sup>6</sup>

Many children who have their maltreatment-related problems identified will not meet the high thresholds for action by children's social care, which result from social workers prioritising scarce resources in an overstretched service.<sup>2,7,8,9,10</sup> Academics are increasingly recognising that professionals require a range of responses for maltreatment-related concerns, including but not limited to referral to and joint-working with children's social care.<sup>7</sup> This appears to be reflected in policy and good practice guidelines for GPs which recommend that GPs record and monitor concerns, gather information, discuss with colleagues, hold team meetings and, where thresholds are met, refer the family to children's social care.<sup>11-13</sup> However, a closer look at these documents reveals that these recommendations focus on improving recognition of maltreatment, helping health professionals to make decisions about when it is appropriate to refer a child to children's social care and contributing to social care processes. An exception is new (2013) statutory guidance which provides a description of direct intervention by GPs for some children below the threshold for children's social care intervention. This "lead" role is described as supporting the family, acting as an advocate and coordinating support services.<sup>3</sup> There is little further detail about the suggested responses and it is unclear how they might be put into practice or what skills, resources or service context would be needed.

Similarly, there is little empirical research in this area. Existing research tends to conceptualise "response" as referral to children's social care<sup>14</sup> and focuses exclusively

1  
2  
3 on GP participation in social care processes<sup>15 16</sup> or identification of maltreatment-  
4 related problems.<sup>17-19</sup> One exception is a large mixed methods study by Tompsett et al.  
5 which aimed to explore the nature and consequences of conflicts of interests for  
6 English GPs in safeguarding children, though the scope of the findings were much  
7 broader than its original aim suggests.<sup>20</sup> The study consisted of: a literature review; a  
8 survey of 96 English GPs, in-depth interviews with GPs (N=14); interviews with key  
9 stakeholders (N=19); three focus groups with young people, young mothers and a  
10 minority ethnic group; and a Delphi consensus about the guiding principles of GPs in  
11 safeguarding children (with 25 experts). Data was collected between 2006 and 2007.  
12 To our knowledge, this study is the only existing source of empirical data about how  
13 GPs are responding to concerns about maltreatment in an English setting. The study  
14 identified four roles that GPs played in responding to maltreated children and reported  
15 exemplars of good practice for GPs.  
16  
17  
18  
19  
20  
21  
22  
23  
24  
25  
26  
27

28 We aimed to contribute to the scant research literature on how GPs in England can  
29 respond to maltreatment-related concerns by conducting an in-depth qualitative study  
30 asking how a small sample of GPs understood and responded to child maltreatment-  
31 related concerns in their daily practice.  
32  
33  
34  
35  
36  
37  
38  
39  
40  
41  
42  
43  
44  
45  
46  
47  
48  
49  
50  
51  
52  
53  
54  
55  
56  
57  
58  
59  
60

## METHODS

One researcher conducted in-depth individual interviews with 14 GPs, two practice nurses and two health visitors from four GP practices in England. This paper focuses largely on data from the GP interviews. The practices were known to the research team via a previous research study.<sup>6</sup> The four practices were chosen to include geographical spread across England, to have child protection expertise (at least one 'expert' GP who was a named doctor for child protection (1 GP), had delivered child protection training (all 4 GPs) or had contributed to relevant policy (3 GPs)). All four practices had regular discussion of child protection concerns at clinical meetings and two of the four practices had health visitors based on site. The practices had between three and six full-time-equivalent GPs. At three of the practices four GPs were interviewed and at the remaining practice four GPs were interviewed. Participants at each practice were recruited through the gatekeeper 'expert' GP and researcher visits to the practices. The research team met and corresponded with the four gatekeeper GPs during the study set-up and recruitment phase. These gatekeeper GPs were also interviewed. Two pilot interviews were conducted.

By establishing trust and rapport with the participant in individual interviews, we hoped to elicit 'private' account of experiences, attitudes and beliefs in order to understand what *happened* in primary care.<sup>21-23</sup> 'Private' accounts have been defined as those which tend to contain more controversial views and be based on real experiences, with all their complexity and difficulty.<sup>24</sup> 'Public' accounts, on the other hand tend to confirm the dominant ideology (in our case; what GPs think they *should* be doing).<sup>24</sup> Asking participants to recount stories based on experience also helps to elicit accounts that move beyond the socially acceptable or familiar.<sup>22</sup> A study using focus groups to investigate child safeguarding by GPs in Denmark noted that the GPs appeared to be most comfortable with case-based discussion<sup>17</sup> and this approach appeared to be acceptable to participants and to generate rich data in our two pilot interviews.

In the interviews, the researcher elicited narratives by asking participants to choose two or three "children, young people or families who had prompted maltreatment-related concerns" and describe their concerns and involvement. In keeping with the



1  
2  
3 aim of allowing participants to tell their stories and control the content, the interviews  
4 were free-ranging with minimal steering from the researcher. Similarly, we did not  
5 specify whether participants should choose children already known to or working with  
6 children's social care or whether the concern should be current or historical.  
7  
8  
9

10  
11 Our study design allowed for families to be discussed by two or more participants from  
12 the same practice and each expert GP spoke to colleagues to clarify whether this had  
13 been the case. However, the number of cases in which this occurred (only two families  
14 were discussed by more than one GP) was small and not commented upon further in  
15 this paper. Interviews were face-to-face, conducted between November 2010 and  
16 September 2011, lasted an average of 50 minutes and were audio-recorded and later  
17 transcribed. In total, we collected 837 minutes of interview data from 17 participants  
18 (602 minutes from the 14 GP participants).  
19  
20  
21  
22  
23  
24

25  
26 We used thematic analysis with an inductive and interpretive approach.<sup>22 25</sup> The  
27 exception to this was our a priori interest in whether and how GPs recorded concerns  
28 to inform our population-based analyses measuring GP practice.<sup>5</sup> Using NVivo  
29 software, one researcher systematically assigned to each segment of interview  
30 transcript one or more concept labels (open coding). She made constant comparisons  
31 of codes within and between interviews to generate more abstract themes and build  
32 up an understanding of the relationships between them. The abstract themes and  
33 understanding of relationships between them were refined by paying particular  
34 attention to data that did not fit and using reflections on these instances. We sought  
35 participant views on our preliminary results via an e-leaflet. Seven participants (five  
36 GPs) responded, including at least one from each data collection site. This feedback  
37 was incorporated into the final interpretation. One researcher (the interviewer)  
38 conducted the coding and analysis with support from a senior researcher who  
39 independently coded two transcripts and the wider research team who probed and  
40 questioned interpretation throughout the study.  
41  
42  
43  
44  
45  
46  
47  
48  
49  
50  
51  
52

53 This study was conducted as part of a PhD award and more detailed results can be  
54 found in the first author's thesis, due to be published in 2014.  
55  
56

## 57 RESULTS

58  
59  
60

1  
2  
3 The GP participants tended to be experienced professionals (average 19 years since  
4 qualification; range 5-40 years) who had worked for long periods within their current  
5 practice (average 10 years; range 6 months to 23years). The GPs discussed 26 different  
6 families (range 1-3 families per participant).  
7  
8  
9

10  
11 The data generated themes which we grouped as answers to three overarching  
12 questions: To **whom** were the GPs responding and **why these families**? What **actions**  
13 did they describe taking? What were the important **facilitators or barriers** for these  
14 actions? These questions were identified during data analysis.  
15  
16  
17

### 18 19 **To whom**

20  
21 The GP narratives about families were coded as four broad types, which we named  
22 using quotes from the interviews:  
23  
24

- 25  
26 1. **“stable at this point in time but it’s a never ending story”**: narratives  
27 describing families with previous very serious child protection concerns who  
28 had since achieved a fragile stability that participants perceived to require extra  
29 vigilance on their behalf. Current concerns were about neglect and emotional  
30 abuse.  
31  
32
- 33  
34 2. **“on the edge”**: narratives describing families who were barely coping and  
35 perceived as liable to tip over the edge at any moment. Concerns were about  
36 neglect and, to a lesser degree, emotional abuse.  
37  
38
- 39  
40 3. **“was it, wasn’t it”**: narratives describing situations where participants had a  
41 high degree of uncertainty as to whether physical or sexual abuse had taken  
42 place and where much time was spent trying to establish whether the  
43 suspected abuse was likely to have occurred.  
44  
45
- 46  
47 4. **“fairly straightforward”**: uniformly brief narratives in which there was high  
48 certainty about physical or sexual abuse and decisive onwards referrals.  
49  
50

51  
52 In some cases, it was clear how the participants’ views of the family had evolved over  
53 time and, for this reason, some of the 26 families were classified as more than one  
54 family type (see Table 1). “Stable at this point” and “on the edge” families were  
55 discussed with the highest frequency (see Table 1) and occupied most talk-time. For  
56  
57  
58  
59  
60

1  
2  
3 these families, participants could give a high level of detail about multiple family  
4 members, often reaching back many years. These two family types prompted concerns  
5 about neglect and emotional abuse and it was these concerns that dominated the  
6 interviews:  
7  
8  
9

10  
11 “Neglect really. I think with chaotic lifestyles that the child may become... well  
12 just not be cared for adequately. [...] Parents who become impoverished  
13 because of their drug using behaviour are at just that much more risk of  
14 physical neglect of not feeding the child, not caring for the child, not changing  
15 its nappy, of not... and to an extent emotional neglect as well, just that there’s  
16 not enough parenting input.”  
17  
18  
19  
20

21  
22 (Participant 14; 7 month old baby)  
23

24  
25 “I’m not worried about the children whether they will be abused physically, I’m  
26 worried about the emotional deprivation rather than... the neglect rather than  
27 the abuse.”  
28  
29

30  
31 (Participant 15, two children aged 9 and 11y)  
32

33 For “on the edge” and “stable at this point” families, parental behaviour was  
34 commonly described in terms of “low parenting capacity”, “poor parenting” or  
35 “impoverished” parenting. Participants told how they were concerned that these  
36 parents failed to supervise their children adequately, transferred parenting  
37 responsibilities onto older siblings who were themselves young children, failed to set  
38 boundaries, routines or bedtimes, allowed children to miss school, did not adequately  
39 comply with essential medical care for their children and in some cases, might not be  
40 able to keep young children clean and fed.  
41  
42  
43  
44  
45  
46  
47

48 Although we did not systematically collect information on the current status of each  
49 case with children’s social care, the contact between this agency and the families was  
50 mentioned in many interviews. “On the edge” and “stable at this point” families were  
51 described as being well known to children’s social care, either as child protection  
52 cases (“stable at this point” families) or child in need cases (“on the edge” families; see  
53 Table 1). It was often unclear as to whether “stable at this point” families had *current*  
54  
55  
56  
57  
58  
59  
60

1  
2  
3 contact with child protection services and this was not probed by the interviewer. It  
4 was not clear whether the “was it, wasn’t it?” or “straightforward” cases were known  
5 to children’s social care prior to the referral made by the participant. See Table 1 for a  
6 detailed summary of all four types of family narrative.  
7  
8  
9  
10  
11  
12  
13  
14  
15  
16  
17  
18  
19  
20  
21  
22  
23  
24  
25  
26  
27  
28  
29  
30  
31  
32  
33  
34  
35  
36  
37  
38  
39  
40  
41  
42  
43  
44  
45  
46  
47  
48  
49  
50  
51  
52  
53  
54  
55  
56  
57  
58  
59  
60

1  
2  
3  
4  
5  
6  
7  
8  
9  
10  
11  
12  
13  
14  
15  
16  
17  
18  
19  
20  
21  
22  
23  
24  
25  
26  
27  
28  
29  
30  
31  
32  
33  
34  
35  
36  
37  
38  
39  
40  
41  
42  
43  
44  
45  
46  
47  
48  
49

**Table 1: Whom (typology of narratives about families)?**

*It is important to remember that these typologies of families only tell us about GP perspectives and understandings and cannot be relied on as accurate data about families.*

| “Stable at this point in time but it’s a never ending story”                                                                                                                                                                                                                                                                                                                                                                                                                                                                                                                                                                                                                                                                                                                                                                  | “On the edge”                                                                                                                                                                                                                                                                                                                                                                                                                                                                                                                                                                                                                                                                                                                                                                                                                       | “Was it, wasn’t it?”                                                                                                                                                                                                                                                                                                                                                                                                                                                                                                                                                                                                                                                                                                                                                                                                                                                                 | “Fairly straightforward”                                                                                                                                                                                                                                                                                                                                                                                                                                                                                                                                                                                                                              |
|-------------------------------------------------------------------------------------------------------------------------------------------------------------------------------------------------------------------------------------------------------------------------------------------------------------------------------------------------------------------------------------------------------------------------------------------------------------------------------------------------------------------------------------------------------------------------------------------------------------------------------------------------------------------------------------------------------------------------------------------------------------------------------------------------------------------------------|-------------------------------------------------------------------------------------------------------------------------------------------------------------------------------------------------------------------------------------------------------------------------------------------------------------------------------------------------------------------------------------------------------------------------------------------------------------------------------------------------------------------------------------------------------------------------------------------------------------------------------------------------------------------------------------------------------------------------------------------------------------------------------------------------------------------------------------|--------------------------------------------------------------------------------------------------------------------------------------------------------------------------------------------------------------------------------------------------------------------------------------------------------------------------------------------------------------------------------------------------------------------------------------------------------------------------------------------------------------------------------------------------------------------------------------------------------------------------------------------------------------------------------------------------------------------------------------------------------------------------------------------------------------------------------------------------------------------------------------|-------------------------------------------------------------------------------------------------------------------------------------------------------------------------------------------------------------------------------------------------------------------------------------------------------------------------------------------------------------------------------------------------------------------------------------------------------------------------------------------------------------------------------------------------------------------------------------------------------------------------------------------------------|
| <p>Most common narrative N=16*</p> <ul style="list-style-type: none"> <li>• Very serious and long-term parent drug/alcohol use, mental health problems and domestic violence.</li> <li>• Extensive contact with children’s social care (CSC) child protection services, police and drugs and alcohol services.</li> <li>• Siblings taken into care or died.</li> <li>• Concerns about physical neglect and emotional abuse.</li> <li>• GPs believed that circumstances had recently improved for the children and felt hopeful about capacity to parent in the future.</li> <li>• But new stability was seen as fragile and optimism about future was cautious and uneasy.</li> <li>• Perceived need for continued vigilance to spot relapses (further neglect / emotional abuse) and prevent poor child outcomes.</li> </ul> | <p>Second most common narrative N=12*</p> <ul style="list-style-type: none"> <li>• Lack of boundaries for children; poor school attendance, missed medical appointments, concerns about nutrition and clothing.</li> <li>• Families suffered from: unemployment; inadequate housing; poverty; parental alcohol use or mental health problems; and overwhelming physical health and behavioural problems.</li> <li>• Concerns about neglect and emotional abuse.</li> <li>• Accounts of intermittent and inadequate involvement from child protection services.</li> <li>• Children described as ‘vulnerable’ and often as currently involved with CSC as a child in need.</li> <li>• Problems experienced by GPs as overwhelming and frustrating.</li> <li>• Worry about families “tipping over the edge” at any moment.</li> </ul> | <p>Third most common narrative N=9*</p> <ul style="list-style-type: none"> <li>• Concerns focussed on possible physical or sexual abuse.</li> <li>• Participants were very uncertain whether suspicions “amounted to anything or not” and believed that physical or sexual abuse probably had not occurred.</li> <li>• They described having just enough concern to take further action</li> <li>• In the context of this low level of concern, GPs described CSC’s response as unnecessarily heavy-handed and punitive.</li> <li>• After varying amounts of time (a few days to a year), participants reached the decision, usually in conjunction with CSC, that the child was <i>not</i> likely to have been physically or sexually abused. In the four cases of injured children, participants described on-going concerns about parental supervision (i.e. neglect).</li> </ul> | <p>Least common narrative N=3*</p> <ul style="list-style-type: none"> <li>• These narratives were characterised by concerns about maltreatment described as “obvious” or “barn door” with a high level of suspicion from participants and decisive referrals to CSC or secondary health care.</li> <li>• Narratives were characterised by participants believing that referral to social care or other agencies would result in appropriate and timely services.</li> <li>• These cases were only mentioned in passing and usually as a contrast to one of the other family types, about whom participants talked in detail and at length.</li> </ul> |

\* More narratives than families because some families had more than family classification as participant’s views of the family evolved over time. CSC=children’s social care

### Why these families?

We asked that GPs discuss cases in which they had been personally involved. The reasons that GP gave for choosing a particular case were: it was particularly “challenging” or “complex”; it was typical; it demanded a lot of time and energy; or it was fresh in their mind following recent contact with the family.

Analysis of the narratives in their entirety revealed a clear divide between “fairly straightforward” narratives in which GPs described onward referral of concerns without further involvement and the other types of families where participants described taking responsibility and having on-going involvement with maltreatment-related concerns. There were three characteristics typical of accounts of intense or long-term involvement with maltreatment-related concerns. First, GP involvement could be justified when GPs perceived high medical need in family members, were in regular contact with the families for this reason and conceptualized their own professional response as a ‘medical’ one. This containment of safeguarding within a medical sphere seemed most compatible with chaotic, neglectful families who were seen to be suffering a host of medical and social problems. Secondly, GPs appeared more motivated to intervene when parents were perceived as ‘incompetent’ rather than malicious. This perspective also seemed most compatible with chaotic, neglectful families in which parents were perceived to have had a poor childhood and were struggling with a multitude of other problems. Thirdly, GPs seemed likely to take responsibility for maltreatment-related concerns when they distrusted the contribution from social care services. GPs distrusted input from children’s social care when they perceived this agency to be underestimating the seriousness of the problem (“on the edge” families) or to be responding in an unnecessarily aggressive and punitive manner (“was it, wasn’t it” families; see Table 1).

### Actions

There were seven actions that the GPs described taking in response to maltreatment-related concerns:

1. Monitoring concerns

2. Advocating for families
3. Coaching parents
4. Providing opportune healthcare for children
5. Referral to other services
6. Working with other services
7. Recording concerns

The definitions and descriptions of each of these seven actions are given in Table 2.

Some of the actions were orientated towards whole families (monitoring and advocating), some towards the parents (coaching), some towards the children (opportune healthcare) and some towards other agencies (referral to and working with other services). As Table 2 summarises, the GPs were very aware that their management of maltreatment-related concerns relied on regular contact with families for non-maltreatment related reasons (monitoring and opportune healthcare), help-seeking behaviour and honest disclosure of problems from adult family members (monitoring and advocating), parental engagement with General Practice (coaching and advocating) and being able to offer services that parents wanted (monitoring and opportune healthcare).

Referrals to other services and joint-working across services were discussed almost exclusively in relation to children's social care and paediatric services. GPs acknowledged their reliance on health visitors and GP colleagues for gathering further information (for monitoring) and, in the case of concerns about neglect, deciding whether to make referrals to children's social care. GPs told how they directly referred concerns about sexual or physical abuse to children's social care without consulting other primary care colleagues (Tables 1 and 2). GPs were conscious that they relied on regular meetings of the primary health care team in order to gather wider information about families from health visitors. Health visitors were also seen as a conduit for information about children's social care input with families. For cases perceived to be urgent, health visitors were accessed via telephone or in "corridor conversations", which were perceived to be few and far between following relocation of health visitors away from General Practice.

Table 2: Actions

| What                                                                              | For whom                                                                   | How                                                                                                                                                                                                                                                                                                                                                                                                                                                                                                                                                                                                                                                                                                                                                                                                                                                                                                                                                                                                                                                                                                                                                      | Why                                                                                                                                                                                                                                                                              | Context                                                                                                                                                                                                                                                                                                                                                                                                                                                                                                        |
|-----------------------------------------------------------------------------------|----------------------------------------------------------------------------|----------------------------------------------------------------------------------------------------------------------------------------------------------------------------------------------------------------------------------------------------------------------------------------------------------------------------------------------------------------------------------------------------------------------------------------------------------------------------------------------------------------------------------------------------------------------------------------------------------------------------------------------------------------------------------------------------------------------------------------------------------------------------------------------------------------------------------------------------------------------------------------------------------------------------------------------------------------------------------------------------------------------------------------------------------------------------------------------------------------------------------------------------------|----------------------------------------------------------------------------------------------------------------------------------------------------------------------------------------------------------------------------------------------------------------------------------|----------------------------------------------------------------------------------------------------------------------------------------------------------------------------------------------------------------------------------------------------------------------------------------------------------------------------------------------------------------------------------------------------------------------------------------------------------------------------------------------------------------|
| Monitoring: keeping a “watchful eye” on families and being “a bit more vigilant”. | Frequently “stable at this point”.<br>Occasionally “on the edge” families. | <ul style="list-style-type: none"> <li>Using routine health-checks in children and regular consultations for health problems in parents to assess well-being of children and coping/risk factors in parents.</li> <li>Receiving information about family life and parenting from other family members during consultations, esp. grandmothers.</li> <li>Assessing the family and risk during (routine) GP post-natal home-visits.</li> <li>Checking the electronic health records for subsequent presentations to colleagues.</li> <li>Interpreting missed appointments as a possible sign of escalating problems in the family. Usually this relied on the individual practitioner but one GP was developing a practice-wide system to capture all missed primary and secondary care appointments by &lt;16s.</li> <li>Using primary care team meetings about child safeguarding to gather wider information, anticipate stressful or important points in a family’s life, such as the birth of a new baby or to gather wider information about a family. Health visitors were essential for these meetings to fulfil a monitoring function.</li> </ul> | To ascertain whether or not there was relevant information that needed to be passed onto social care (in the form of a referral). Missed appointments could result in a phone call from the GP and, if necessary, a letter and/or discussion in the vulnerable families meeting. | <p>When confident that the family would seek help and disclose honest information, GPs felt comfortable with the role of monitoring and risk assessment in “stable at this point” families. Honest disclosure and help-seeking behaviour in families relied on GPs being seen as a trusted ally.</p> <p>Some GPs and the health visitors recognised that GP monitoring was limited due to ‘health’ focus without wider information. GPs relied heavily on health visitors to fulfil their monitoring role.</p> |



| What                                                                                                                            | For whom                                                                                                             | How                                                                                                                                                                                                                                                                                                                                                                                                                                                                                                                                                                                    | Why                                                                                                                                                                                                                                                                                                                                                                                                                                                                                                           | Context                                                                                                                                                                                                                                                                                                          |
|---------------------------------------------------------------------------------------------------------------------------------|----------------------------------------------------------------------------------------------------------------------|----------------------------------------------------------------------------------------------------------------------------------------------------------------------------------------------------------------------------------------------------------------------------------------------------------------------------------------------------------------------------------------------------------------------------------------------------------------------------------------------------------------------------------------------------------------------------------------|---------------------------------------------------------------------------------------------------------------------------------------------------------------------------------------------------------------------------------------------------------------------------------------------------------------------------------------------------------------------------------------------------------------------------------------------------------------------------------------------------------------|------------------------------------------------------------------------------------------------------------------------------------------------------------------------------------------------------------------------------------------------------------------------------------------------------------------|
| <p>Advocating: “you’ve got to stand up and shout for people” (making a case to other agencies on the participant’s behalf).</p> | <p>Frequently “on the edge” and “was it, wasn’t it?” families.<br/>Occasionally “stable at this point” families.</p> | <ul style="list-style-type: none"> <li>Supporting requests for improved housing or benefits.</li> <li>For “on the edge” families, interceding with social care to make this agency recognise the seriousness of the family’s problems and offer (what the GPs perceived to be) a more appropriate level of service (usually child protection services).</li> <li>For “was it, wasn’t it” families, interceding with social care to reduce an unnecessarily heavy-handed or insensitive approach and encouraging these families to demonstrate cooperation with social care.</li> </ul> | <p>Improving quality of life (housing, poverty) was perceived as directly impacting on parenting and, by this route, on child welfare.</p> <p>GPs saw many “on the edge” children as in need of protection (and sometimes removal) in order to mitigate poor child outcomes.</p> <p>By encouraging compliance, GPs aimed to avoid things “getting worse” for these families with an even more coercive approach from this agency and, instead, to help the family access supportive social care services.</p> | <p>The need to intercede with social care was seen as greatest in the “on the edge” families whose children has suffered “terrible neglect” over years but where maltreatment did not pose an immediate threat to child’s physical safety and/or was not as “barn door” as some of the other types of abuse.</p> |

| What                                                                                                                                               | For whom                                  | How                                                                                                                                                                                                                                                                                                                                                                                                           | Why                                                                                                                                                                                                                                                                                                                                   | Context                                                                                                                                                                                                                                                                                         |
|----------------------------------------------------------------------------------------------------------------------------------------------------|-------------------------------------------|---------------------------------------------------------------------------------------------------------------------------------------------------------------------------------------------------------------------------------------------------------------------------------------------------------------------------------------------------------------------------------------------------------------|---------------------------------------------------------------------------------------------------------------------------------------------------------------------------------------------------------------------------------------------------------------------------------------------------------------------------------------|-------------------------------------------------------------------------------------------------------------------------------------------------------------------------------------------------------------------------------------------------------------------------------------------------|
| <p>Coaching: activating of parents by attempting to shift mind-set, take responsibility for their problems and, eventually, change behaviours.</p> | <p>Frequently “on the edge” families.</p> | <ul style="list-style-type: none"> <li>Talking to parents, usually the mother, to encourage them to “look at different ways of thinking about things”, such as realising “that there was actually a problem with the children” or that “stopping drinking was a good thing”.</li> <li>Talking to parents, usually the mother, to encourage them to “change their life” or “change her behaviours”.</li> </ul> | <p>A parent’s willingness or ability to recognise that there was a problem seemed to make the difference between situation perceived as hopeful and one perceived as hopeless for the family. Parental (maternal) recognition of the problem was seen as the first step in intervening to improve the situation for the children.</p> | <p>This was described as a difficult task that was often attempted but infrequently achieved.</p> <p>In order to have a hope of changing parental mind-set (and eventually behaviour), GPs saw that the parents needed to be engaged with primary care and to see the GP as a trusted ally.</p> |
| <p>Opportune healthcare: providing (missed) routine and preventive healthcare for children during consultations for other reasons.</p>             | <p>Frequently “on the edge” families.</p> | <ul style="list-style-type: none"> <li>Meeting preventive healthcare needs of the children during parent/child consultations for other reasons (e.g. overdue immunisations or developmental checks).</li> <li>This had to be done immediately as the parents could not be relied on to come back at a later date.</li> </ul>                                                                                  |                                                                                                                                                                                                                                                                                                                                       | <p>Facilitated by being able to offer something that the family wanted (leverage) such as letters to support benefits claims and easy access to a willing health visitor.</p>                                                                                                                   |

1  
2  
3  
4  
5  
6  
7  
8  
9  
10  
11  
12  
13  
14  
15  
16  
17  
18  
19  
20  
21  
22  
23  
24  
25  
26  
27  
28  
29  
30  
31  
32  
33  
34  
35  
36  
37  
38  
39  
40  
41  
42  
43  
44  
45  
46  
47  
48  
49

| What                                                                                                                                                                                                                                                          | For whom                                                                                                                          | How                                                                                                                                                                                                                                                                                                                                              | Why                                                                                                            | Context                                                                                                                                                                                                                                                                                                                   |
|---------------------------------------------------------------------------------------------------------------------------------------------------------------------------------------------------------------------------------------------------------------|-----------------------------------------------------------------------------------------------------------------------------------|--------------------------------------------------------------------------------------------------------------------------------------------------------------------------------------------------------------------------------------------------------------------------------------------------------------------------------------------------|----------------------------------------------------------------------------------------------------------------|---------------------------------------------------------------------------------------------------------------------------------------------------------------------------------------------------------------------------------------------------------------------------------------------------------------------------|
| <p>Referral to other services</p> <p>Although there were mentions of referral to the police or to specialist child protection assessment clinics, these were rare. In contrast referral to children’s social care and/or paediatric services were common.</p> | <p>Frequently “fairly straightforward” and “was it, wasn’t it” families.</p> <p>Occasionally “stable at the moment” families.</p> | <p>Children’s social care</p> <ul style="list-style-type: none"> <li>• Immediately, decisively and directly following consultation with a child or parent.</li> <li>• After using health visitor opinion or follow-up to confirm or counter GP concerns, sometimes via an additional filter of the safeguarding lead in the practice.</li> </ul> |                                                                                                                | <p>Direct referrals to social care involved certainty about physical abuse. For emotional abuse, neglect or highly uncertain physical abuse GPs used follow-up by health visitors to scale concerns up and meet thresholds for referral to children’s social care or provide reassurance and decide against referral.</p> |
|                                                                                                                                                                                                                                                               | <p>“Was it, wasn’t it” families.</p>                                                                                              | <p>Paediatric services:</p> <ul style="list-style-type: none"> <li>• Referral to hospital paediatricians for an assessment of injuries or symptoms which might be related to physical or sexual abuse.</li> <li>• Children referred to paediatric services were also simultaneously referred to children’s social care by the GP.</li> </ul>     | <p>GPs sought a full assessment and documentation of child injuries or symptoms, including probable cause.</p> | <p>GPs recounted stories of how paediatrician behaviour could be insensitive to GP-family relationships and did not support or encourage future referrals.</p>                                                                                                                                                            |

## Facilitators and barriers

### *The relationship between GPs and families*

Participants described how they went out of their way and invested significant time and effort to develop trust with parents as part of their response to maltreatment-related concerns. This was the strongest and most persistent theme across the interviews. GPs described how they cultivated a position as trusted ally – a dependable professional who had a family’s best interests at heart (Box 1, quote 1). Trust and engagement were seen as necessary for monitoring maltreatment-related concerns (encouraging patients to “come through the door”, seek help with parenting and honestly disclose information) and providing coaching and advocacy (encouraging parents to be receptive to advice; Box 1, quotes 2 and 3 and Table 2). Keeping parents in contact with and engaged with General Practice was a key motivator for the participants (Box 1, quotes 4 and 5). GPs saw that it was easiest to develop trust and encourage engagement when they had something to offer the family, such as being able to meet high health need or write a letter in support of state benefits and/or housing (Box 1, quotes 6 and 7). Developing trust with parents was perceived to have potential harms as well as benefits. Several participants highlighted the potential for the child’s needs to be overlooked or the extent of the maltreatment “missed” due to a focus on parental needs and the primacy GP-parent relationship. The GPs described themselves as consciously navigating a course between benefit and harms (Box 1, quotes 8 and 9).

## Box 1: The relationship between GP and family: quotations

1  
2  
3  
4  
5  
6  
7  
8  
9  
10  
11  
12  
13  
14  
15  
16  
17  
18  
19  
20  
21  
22  
23  
24  
25  
26  
27  
28  
29  
30  
31  
32  
33  
34  
35  
36  
37  
38  
39  
40  
41  
42  
43  
44  
45  
46  
47  
48  
49  
50  
51  
52  
53  
54  
55  
56  
57  
58  
59  
60

1: "Well, I just wanted her [the mother] to know [...] there was someone steady and with their hand on the tiller." (*Participant 8; discussing 8y old*)

2: "It's [the reason to develop trust] not frightening them away because , as well, there is that kind of unseen agreement between you. She is thinking: 'if this gets a bit much for me, I might be asking you for a bit more help'. 'How will you be when I ask you for more help?' and I am thinking 'if this gets too much for you I might ask you if you need more help. I want you to be accepting of that help and not worried about it.'" (*Participant 0, discussing 4y with older siblings*)

3: "I have no teeth to then in any way punish her [the mother] or hold her otherwise to account. All I can say is I'm disappointed that you haven't done this. [...] Doctors don't go about punishing patients by and large. We rely on our encouragement and then a sort of heavy sigh and well..." (*Participant 4, discussing 2.5y old*)

4: "The way general practice is set up is, is that we respond to people who decide that they want our help. [...] You know what's come to you, but you don't know what's out there that isn't coming to you, that isn't choosing to come through the door, for whatever reason." (*Participant 7, discussing siblings aged 6y and 10y old*)

5: "[If we don't engage her] that girl will shut herself and we will not be able to get all the story from her what's happening" (*Participant 15, discussing siblings aged 9 and 11y old*)

6: "...making sure they have got the right meds, making sure that you hurry along the referrals, making sure that they are dealt with politely...." (*Participant 0, discussing 4y old with two older siblings*)

7: "because we can actually give them what they think they want but there may be a trade-off. 'I can get what I want, if I accept this.'" (*Participant 0, discussing 4y old child with two older siblings*)

8: "So I was kind of...I'm try...I'm trying to steer a line between, um, keeping her [the mother] informed and feeling I'm kind of...and not wanting to miss anything." (*Participant 8, discussing 8y old*)

9: "So it's a fine balance to make and sometimes as a professional you have to make sure everybody is safe and at the same time you keep that confidence." (*Participant 15, discussing siblings aged 9 and 11y old*)

*\*All quotations in this box are from GP participants*

### The relationship between GPs and health visitors

In all but three interviews, GPs revealed dependence on health visitors in their responses to maltreatment-related concerns and talked about this professional group far more than any other. Access to health visitor knowledge, assessments and time was seen as a necessarily facilitator of monitoring, referral to children's social care and working with children's social care (Table 2). However, the two health visitors in our sample did not see GPs as central to their safeguarding work unless there was a 'medical' element to the concern (Box 2, quotes 1 and 2). The two health visitors believed GPs had much more limited knowledge than they did (Box 2, quote 3) and were ignorant of important information, despite having regular contact with these families (Box 2, quotes 4 and 5). The health visitors viewed GPs as keen to avoid or off-load child protection work (Box 2, quotes 5 and 6). Both health visitors and GPs recognised that their relationship was undermined by the trend towards re-location of health visitors away from General Practice (Box 2, quotes 7 and 8). The responses that GPs described as reliant on health visitor input and communication should be viewed in the context of the probably imperfect and unequal relationship between the two professionals.

## Box 2: The relationship between GPs and health visitors: quotations

1  
2  
3  
4  
5  
6  
7  
8  
9  
10  
11  
12  
13  
14  
15  
16  
17  
18  
19  
20  
21  
22  
23  
24  
25  
26  
27  
28  
29  
30  
31  
32  
33  
34  
35  
36  
37  
38  
39  
40  
41  
42  
43  
44  
45  
46  
47  
48  
49  
50  
51  
52  
53  
54  
55  
56  
57  
58  
59  
60

1: Interviewer: "And how do you see, how does a GP or that GP surgery support you with what you're doing with the family?"

Respondent: "I don't know, yeah. I, I, I mean I'll ring up and I'll say I'm worried and they'll, but yeah, I don't know really." (*Participant 2, discussing siblings aged 2 and 3y old*)

2: "Unless it was a health need as in, did I see a burn on the arm, then I might [inform the GP]. But certainly if it was just emotional kind of neglect or anything like that, I wouldn't routinely phone the GP there and then to say I'd made the referral." (*Participant 16, talking generally*)

3: "Certainly in my experience I've never been informed of anything that I didn't know of via a GP." (*Participant 16, talking generally*)

4: "I don't think they were aware, and certainly weren't aware that she was going off on drinking binges and leaving the children." (*Participant 16, discussing siblings aged 3y and 7y old*)

5: "I don't think they're aware of the problems" (*Participant 1, discussing four siblings under 6y old*)

6: "...but it is worrying and it happens more often than what I think we know, that GPs avoid addressing issues." (*Participant 16, discussing siblings aged less than one year old and 2y old*)

7: "I think they're, again, a family that probably take up quite a lot of the GP's time so the GP's quite happy to sort of share it out." (*Participant 1, discussing four siblings under 6y old*)

8: "I think ultimately being based in the same building, seeing people day to day, you know in the kitchen, putting the kettle on, that kind of daft thing does build a good relationship" (*Participant 16, discussing siblings aged 3y and 7y old*)

*\*All quotations in this box are from the two health visitor participants*

### Relationships between GPs and other professionals

In comparison to their description of working with health visitors, GPs gave relatively little detail about how relationships with other professionals helped or hindered their responses. GPs wished to be seen as separate from children's social care and paediatric services, which they thought patients saw as punitive and policing (Box 3, quotes 1-3). Both services were perceived to be insensitive to the GP's position: social care did not provide necessary feedback to the GP (Box 3, quote 4) and paediatric services could unthinkingly and unnecessarily damage hard-earned GP-patient relationships (Box 3, quote 5). The one-way flow of information share with children's social care was seen to be exacerbated by lack of personal relationships between GPs and social workers and high staff turn-over within children's social care. In the case of paediatric services, GPs were able to draw on personal contacts to deliberately seek out trusted paediatricians (Box 3, quote 6).



## Box 3: GPs and other professionals: quotations

1  
2  
3  
4  
5  
6  
7  
8  
9  
10  
11  
12  
13  
14  
15  
16  
17  
18  
19  
20  
21  
22  
23  
24  
25  
26  
27  
28  
29  
30  
31  
32  
33  
34  
35  
36  
37  
38  
39  
40  
41  
42  
43  
44  
45  
46  
47  
48  
49  
50  
51  
52  
53  
54  
55  
56  
57  
58  
59  
60

1: "I think a lot of people view social services as their only job is to take children away." (*Participant 13, discussing unborn child*)

2: "she [the paediatrician] is seen as just there to check up on you." (*Participant 0, discussing 13m old child*)

3: "that can affect your relationship with the patient because then they lump you with social services and see you as part of the people trying to take away their child." (*Participant 13, discussing unborn child*)

4: "You don't get information from social services. They don't let you know, unless there happens to be a reason for them ringing because they want information from us." (*Participant 7, discussing unborn child*)

5: "They saw a general paediatrician, he just thought it was rough play and he didn't see why on earth I'd sent them along, which completely undermined our position. The last thing we needed was to get a secondary care response that did that because it then became more difficult to engage them at a child in need level because it's much more voluntary, isn't it?" (*Participant 5, discussing three siblings aged between 5m and 3y old*)

6: "So I think that would – that's – I think it's very important that as clinicians we sit and talk to each other about who we trust and who we don't trust in secondary care as well." (*Participant 2, talking generally*)

*\*All quotations in this box are from GP participants*

### **“A very medical role”**

Just as the two health visitors confined the GPs role to a “medical” one, so the GPs in the sample framed their responses as “medical”. Framing of responses and problems as “medical” was one way that the GPs justified and legitimised their on-going involvement with families who had known maltreatment-related problems. In this way the medicalization of maltreatment-related concerns and responses acted as a facilitator of GP action.

On-going involvement with the maltreatment-related concerns was justified first and foremost in terms of high medical need in the families (Box 4, quote 1). Several GPs stated or implied that contact with families for maltreatment-related concerns in the absence of “medical” need was not a legitimate part of the GP’s role (Box 4, quote 2). The theoretical distinction between “medical” and “social” problems was used by participants to delineate where the GP could legitimately be involved with maltreatment-related concerns. However, elsewhere in the interviews, this neat distinction was challenged. “On the edge” families were described as presenting indiscriminately with health and social welfare need (Box 4, quote 3) and one participant described how the complex mix of family need forced her to step into multiple roles, some of which were perceived to be contested (Box 4, quote 4). The extent and nature of the GP role was a difficult and slippery concept for the GP participants.

Figure 1 summarises the relationship between the families that GPs described responding to, the actions they described taking and the important barriers and facilitators that helped or hindered these responses.

## Box 4: GPs and other professionals: quotations

1  
2  
3  
4  
5  
6  
7  
8  
9  
10  
11  
12  
13  
14  
15  
16  
17  
18  
19  
20  
21  
22  
23  
24  
25  
26  
27  
28  
29  
30  
31  
32  
33  
34  
35  
36  
37  
38  
39  
40  
41  
42  
43  
44  
45  
46  
47  
48  
49  
50  
51  
52  
53  
54  
55  
56  
57  
58  
59  
60

1: Interviewer: "And what do you think is your role as a GP for them?"

Respondent: "Well, I...I...I think that we'll always have a very medical role for this family. They're very...they have very great medical needs so they...that's kind of...although it's difficult, is the relatively easy bit. I mean, how we tap into the sort of welfare issues of families and children, I think is, um, much more difficult, much more difficult." (*Participant 5, discussing 4y old with four siblings*)

2: "...arranging follow up for the purposes of reviewing concerns around umm, safeguarding, I wouldn't see as part of our role." (*Participant 7, discussing siblings aged 6 and 10y*)

3: "They used to come for their medications. They used to come for all these letters for Social Services, letters for something, housing, benefit or something or something." (*Participant 15, discussing 2y old*)

4: "... maybe we should just be saying, well, I'm sorry, but there's nothing I can do or, you know, I am the GP, I'm not the social worker. If she's not going to school, you know, you'll have to phone social services or somebody else who can do this, because that's not my job. And maybe we sort of just blurred boundaries too much by taking on work that possibly isn't really appropriate for us to do." (*Participant 10, discussing three siblings aged between 9y and 16y old*)

*\*All quotations in this box are from GP participants*

## DISCUSSION

### Summary of findings

GPs described being actively involved with the management of (possible) child neglect and emotional abuse and much of their response was aimed at the parents or the whole family. GPs described seven important responses: monitoring, advocating, coaching, providing opportune healthcare, referring to other services, working with other services and recording. Three main facilitators emerged from the data. First, help-seeking behavior and honest disclosure from parents was deliberately encouraged by the GPs who described significant effort in establishing a trusting and reciprocal relationship. Parental engagement with General Practice and help-seeking behaviour was seen as necessary for GP responses to have any chance of changing parental mindset or behaviour and thereby improving circumstances for the child. Secondly, information and support from health visitors, which was threatened by mismatched expectations and relocation of health visitors. Thirdly, conceptualization of the problem and the response as “medical”, which permitted and justified GP involvement. GPs saw some limitations of the way that they responded including: working within a reactive system, potentially prioritizing the needs of the parent over those of the child or “missing” things.

This study describes responses that are feasible where there is some expertise and interest within General Practice. **Despite our case-based approach and although accounts were detailed, candid and included emotion and uncertainty, it is possible that some GPs recounted what they thought they *should have done* rather than what they actually did.** This study was not designed to quantify how far the family types represent maltreatment-related concerns among all GPs in England but the families described by our participants are likely to be familiar within General Practice. Descriptions of “on the edge” and “stable at this point families” were compatible with other descriptions of families and adults with social welfare problems in this setting.<sup>26</sup> “On the edge” narratives resonated with another well-known presentation: the “heart-sink” patient. “Heart-sink” patients have been described as those whose chronic and

1  
2  
3 multiple problems cannot be cured or solved and which evoke exasperation, defeat  
4 and helplessness in the GP.<sup>27 28</sup>  
5  
6

7  
8 Equally, although we do not know how far the seven responses are being used in  
9 General Practice more widely, they do reflect core GP skills. Monitoring, which can also  
10 been termed review or “watchful waiting” is a substantial part of GP practice and has  
11 been used as part of proactive management for other groups who present with a  
12 mixture of social and welfare problems, such as the frail elderly.<sup>29</sup> Acting as an  
13 advocate to help patients access and navigate services within and beyond the NHS  
14 constitutes part of managing chronic health conditions in General Practice and is  
15 expected by patients.<sup>30 31-33</sup>  
16  
17  
18  
19  
20  
21

22 Coaching incorporates elements common to promoting “self-management” of chronic  
23 disease and “motivational interviewing”, in which professionals attempt to activate the  
24 response from patients by encouraging them to take responsibility for their own  
25 health.<sup>34</sup> Providing opportune healthcare as a routine part of consultations has been  
26 long considered a fundamental part of the GP consultation.<sup>35</sup> Feedback from  
27 participants on provisional results supported the interpretation of monitoring,  
28 advocating, coaching and opportune healthcare as core GP work. Several GPs stated  
29 they would use these skills more widely, specifically for patients with cancer or multi-  
30 morbidities.  
31  
32  
33  
34  
35  
36  
37  
38

39 In summary, responses to maltreatment-related concerns can be located as an  
40 extension of ‘normal’ GP work rather than an isolated or peripheral part of their  
41 professional activity. This was explicitly recognised by some of the GPs in our sample  
42 and by some of the GPs in the mixed methods study by Tompsett et al.<sup>20</sup>  
43  
44  
45  
46

47 The findings of our study confirm those from the only other empirical study on  
48 responses to maltreatment-related concerns by GPs in England.<sup>20</sup> In this study,  
49 Tompsett et al. outlined four roles that the GP was perceived to play and three of  
50 them overlap substantially with findings from our study. The “case holder” role was  
51 similar to the role that the GPs in our sample described for “on the edge” and “stable  
52 at this point” families. Like our study, the Tompsett et al. study suggests that GPs  
53 might have the biggest role to play for children with chronic neglect, that GPs feel the  
54  
55  
56  
57  
58  
59  
60

1  
2  
3 need to keep their involvement within a “medical” sphere, that health visitors are a  
4 key professional in GP’s safeguarding responses, and that building rapport with  
5 parents and providing follow-up are good practice strategies in this area.<sup>20</sup> The study  
6 by Tompsett et al. and other qualitative studies also report that GP responses to social  
7 welfare concerns in children, including concerns about child abuse or neglect, are  
8 often aimed at parents.<sup>17-20</sup> Table three describes how our findings confirm and extend  
9 Tompsett et al’s work by a) providing a detailed description of the monitoring,  
10 coaching, advocating and providing opportunistic preventive healthcare that were part  
11 of their “case-holder” role and b) by suggesting that the four roles are differentially  
12 adopted according to how family problems are understood by the GP (i.e. according to  
13 family type). Our results provide a sufficiently high level of detail about GP *actions* and  
14 their context that they can be used as a starting point to develop relevant  
15 interventions.  
16  
17  
18  
19  
20  
21  
22  
23  
24  
25  
26  
27  
28  
29  
30  
31  
32  
33  
34  
35  
36  
37  
38  
39  
40  
41  
42  
43  
44  
45  
46  
47  
48  
49  
50  
51  
52  
53  
54  
55  
56  
57  
58  
59  
60

1  
2  
3  
4  
5  
6  
7  
8  
9  
10  
11  
12  
13  
14  
15  
16  
17  
18  
19  
20  
21  
22  
23  
24  
25  
26  
27  
28  
29  
30  
31  
32  
33  
34  
35  
36  
37  
38  
39  
40  
41  
42  
43  
44  
45  
46  
47  
48  
49

Table 3: Comparison of our findings with study by Tompsett et al.<sup>20</sup>

| Four roles outlined by Tompsett et al                                                                                                                                                                                                                                                                                           | Relevant findings from our study                                                                                                                                                                                                                                                                                                                          |                                                                                                                                                                                                                                                                                                                                                                                                                                                                                                                                                                                                                                                                                                                                                                                                                                                                                                                                                                                                                      |
|---------------------------------------------------------------------------------------------------------------------------------------------------------------------------------------------------------------------------------------------------------------------------------------------------------------------------------|-----------------------------------------------------------------------------------------------------------------------------------------------------------------------------------------------------------------------------------------------------------------------------------------------------------------------------------------------------------|----------------------------------------------------------------------------------------------------------------------------------------------------------------------------------------------------------------------------------------------------------------------------------------------------------------------------------------------------------------------------------------------------------------------------------------------------------------------------------------------------------------------------------------------------------------------------------------------------------------------------------------------------------------------------------------------------------------------------------------------------------------------------------------------------------------------------------------------------------------------------------------------------------------------------------------------------------------------------------------------------------------------|
|                                                                                                                                                                                                                                                                                                                                 | Similarities                                                                                                                                                                                                                                                                                                                                              | What our study adds                                                                                                                                                                                                                                                                                                                                                                                                                                                                                                                                                                                                                                                                                                                                                                                                                                                                                                                                                                                                  |
| <p><b>1. The case holder:</b><br/>GP has on-going relationship with family before, during and after referral to children’s social care. This role builds on voluntary disclosure and establishing trust over time with the parents. This role was clearly identified by GPs but not recognised so much by the stakeholders.</p> | <p>Comparable to the role that GPs in the sample described in relation to ‘stable at this point’, ‘on the edge’ and ‘was it, wasn’t it?’ families, both in the on-going nature of the relationship with families and in the reliance on voluntary disclosure and trust by parents. This was the most commonly described role by the GPs in my sample.</p> | <p>This role might be performed most commonly where:</p> <ul style="list-style-type: none"> <li>• Families had multiple health problems (including those caused by child neglect) which: <ul style="list-style-type: none"> <li>○ Provided a reason for repeated contact</li> <li>○ Legitimised GP intervention in child safeguarding concerns</li> <li>○ Offered opportunity for establishing trust and reciprocity and encourage help-seeking behaviours by meeting high need</li> </ul> </li> <li>• GPs perceived that social care was not/not likely to offer appropriate services</li> <li>• GPs could construct concerns as due to “incompetent” (rather than “malicious” parenting) which allowed sympathy with the parents and facilitated on-going GP involvement.</li> </ul> <p>These factors were typical of families who prompted concerns about chronic <i>neglect</i>.</p> <p>The ‘case-holder’ role also included monitoring, coaching, advocating and providing opportune preventive healthcare.</p> |

| Four roles outlined by Tompsett et al                                                                                                                                                                                    | Relevant findings from our study                                                                                                                                             |                                                                                                                                                                                                                                                                                                                        |
|--------------------------------------------------------------------------------------------------------------------------------------------------------------------------------------------------------------------------|------------------------------------------------------------------------------------------------------------------------------------------------------------------------------|------------------------------------------------------------------------------------------------------------------------------------------------------------------------------------------------------------------------------------------------------------------------------------------------------------------------|
|                                                                                                                                                                                                                          | Similarities                                                                                                                                                                 | What our study adds                                                                                                                                                                                                                                                                                                    |
| <p><b>2. The sentinel:</b><br/>GP identifies child maltreatment and refers the concern to social care or other health services.</p>                                                                                      | <p>Comparable to the role for families with 'fairly straightforward' concerns (infrequently described). Here concerns were referred onwards with no further involvement.</p> | <p>This role might be performed most commonly where:</p> <ul style="list-style-type: none"> <li>• GPs perceived that other agencies responded (or would respond) appropriately.</li> </ul> <p>This was typically in cases of concerns about <i>physical abuse</i> or, less frequently, an episode of acute neglect</p> |
| <p><b>3. The gatekeeper:</b><br/>GP provides information to other agencies so that those agencies can make decisions about access to services.</p>                                                                       | <p>This role was not directly comparable to any described by the GPs in the sample.</p>                                                                                      | <p>The GPs did offer information to social care, especially for "stable at this point" families. However, this information was unprompted and resulted from on-going monitoring and risk assessment for families with a history of very serious child-maltreatment concerns who had achieved a fragile stability.</p>  |
| <p><b>4. Multi-agency team player:</b><br/>GP has continued engagement with other professionals outside the practice. This role is fulfilled when GP contributes actively to social care child protection processes.</p> | <p>Comparable to the few instances in which GPs described working with social care and actively participating in their child protection processes.</p>                       | <p>This role might be performed most commonly where:</p> <ul style="list-style-type: none"> <li>• GPs knew the families well and did not trust social care to offer appropriate services<br/>AND</li> <li>• GPs perceive that there were medical issues giving them a unique medical perspective</li> </ul>            |



1  
2  
3 The GPs in our sample saw the potential for both benefit and harm in their approach  
4 to maltreatment-related concerns. Many of these overlap with the benefits and harms  
5 which have been attributed to the GP-patient relationship not just in the study by  
6 Tompsett et al. about child maltreatment but also in qualitative studies about the  
7 management of chronic conditions. A trusting and constant doctor-patient relationship  
8 has been seen by both doctors and patients as facilitating honest disclosure of  
9 hardships (such as domestic violence and past abuse), to help patients cope with these  
10 issues,<sup>36</sup> to offer GPs a mechanism for changing patient attitudes and behavior,<sup>34 36</sup>  
11 and, to be a way of helping the child when the principle patient is the parent.<sup>20</sup>  
12 However, GPs also agree that if the relationship is not sufficiently strong, attempting to  
13 “coach” patients might scare them away from using services<sup>34</sup> and a dysfunctional  
14 doctor-patient relationship might promote tolerance of “bad” behavior by doctors or  
15 may make GPs more likely to miss new and serious symptoms.<sup>36 37</sup> GPs have previously  
16 recognized that building relationships with parents may come at the cost of  
17 overlooking the child’s needs.<sup>20</sup> Analyses of maltreatment-related child deaths suggest  
18 that therapeutic relationships can be very dangerous for the child if professionals do  
19 not recognise disguised compliance (apparent co-operation by parents to diffuse  
20 professional intervention) or if empathy with parents is accompanied by “silo” working  
21 (failure to look at a child’s needs outside of their own specific brief).<sup>38</sup>

22  
23  
24  
25  
26  
27  
28  
29  
30  
31  
32  
33  
34  
35  
36  
37 The GPs in our sample described how they sought to establish a trusting relationship  
38 with the families to encourage engagement with General Practice, disclosure of  
39 difficulties and acceptance of help and advice. We did not seek the views or  
40 experiences of parents and children. However, there is considerable evidence from  
41 other qualitative studies that families perceive GPs as dismissive, unapproachable  
42 and/or judgmental,<sup>39 40</sup> are reluctant to confide in the GP<sup>41</sup> or to present<sup>42</sup> and  
43 perceive their relationship with the GP to be meaningless or non-existent.<sup>20</sup> If the  
44 families described in our sample had a similarly negative perception of the GP service,  
45 this would undermine any credible chance that the seven actions could work in the  
46 way that the GPs hoped. It is also possible that further responses might be identified in  
47 different sample of GPs.

1  
2  
3 The perspectives and experiences of parents and children are an important avenue for  
4 future research. Although there was substantial overlap between our findings and  
5 those from the only other empirical study about GPs and wider responses to  
6 maltreatment-related concerns, it would be helpful to repeat our study in a different  
7 sample of GPs to identify any additional responses. Future studies are needed to  
8 evaluate the impact of the responses we have identified on children and families who  
9 prompt maltreatment-related concerns in General Practice. Such studies should take  
10 into account the considerable skill required to use the therapeutic relationship for  
11 monitoring and coaching, the potential for more harm than good and that the  
12 responses may only be considered acceptable for concerns about neglect or emotional  
13 abuse and/or feasible for a subset of help-seeking families.<sup>38</sup>

### 23 Implications

- 26 • Policy and research focus should be broadened to include direct intervention  
27 by GPs for families who prompt maltreatment-related concerns, as well as GP  
28 referral to children's social care and participation in social care processes. The  
29 actions we identified provide detailed exemplars of direct intervention.
- 33 • A shift in thinking to incorporate core GP skills such as advocating, coaching and  
34 providing opportune healthcare into "safeguarding" activity make this work  
35 more central and relevant to GPs who do not consider themselves to have  
36 specialist expertise in this area. It is, however, also possible that labelling this  
37 work as "safeguarding" might make it more difficult for GPs to respond.
- 41 • As the responses represent core skills and activities of General Practice which  
42 are used for other patient groups, there is likely to be significant existing skill  
43 within General Practice. However, it is possible that GPs more generally might  
44 not have the time or inclination to use these skills in relation to maltreatment-  
45 related concerns.
- 50 • Our study suggests that the GP might be a very important professional for  
51 families who present regularly to General Practice with high health need. GPs  
52 might be able to impact on child outcomes through treating health needs of the  
53 parents and building a therapeutic relationship with the parents. We do not

1  
2  
3 know what proportion of families with maltreatment-related concerns fit this  
4 description.  
5

- 6
- 7 • Funding is needed to develop a model of response to child maltreatment in  
8 General Practice which incorporates the seven responses we identified (as well  
9 as any additional responses from future studies). Any such model must  
10 prioritise the therapeutic relationship and establish genuine help-seeking  
11 behaviour in parents, whilst also recognising the potential harms of this  
12 approach. Concerns about discouraging families from presenting to health care  
13 services should be taken seriously. This research will also be pertinent to  
14 developing the role of “lead professional” for GPs.  
15
  - 16 • Models of GP practice in relation to child maltreatment must be rigorously  
17 evaluated for efficacy, safety and cost.  
18  
19  
20  
21  
22  
23  
24  
25  
26  
27  
28  
29  
30  
31  
32  
33  
34  
35  
36  
37  
38  
39  
40  
41  
42  
43  
44  
45  
46  
47  
48  
49  
50  
51  
52  
53  
54  
55  
56  
57  
58  
59  
60

### Legend for Figures

Figure 1: To whom were GPs responding to, what actions did they take and what were the facilitators and barriers of these actions?

For peer review only

**Data sharing statement**

No additional data is available.

**Ethics**

Ethical approval for the interviews and observations was given by Central London 1 NHS Research Ethics Committee on the 8<sup>th</sup> October 2010 (Reference 10/H0718/6).

**Acknowledgements**

We would like to thank the professionals who gave up their valuable time to make this study possible.

**Contributorship**

JW designed the study, conducted the interviews, analysed and interpreted data. She is guarantor. RG and MB designed the study, supervised analyses and contributed to the writing of the paper. DG and JA contributed to the design of the study, interpretation of findings and contributed to the writing of the paper. For ethical reasons only JW, RG and MB had had full access to the data in the study. They take responsibility for the integrity of the data and the accuracy of the data analysis.

**Competing interest**

No competing interests stated.

**Funding**

JW was funded by an MRC/ESRC interdisciplinary PhD studentship. The funders did not have any role in study design; analysis or interpretation of data; in the writing of the report; or in the decision to submit the article for publication. RG is an investigator with the Farr Institute of Health Informatics Research @ UCL Partners.

**Exclusive license statement**

"I, *Jenny Woodman*, The Corresponding Author of this article contained within the original manuscript which includes any diagrams & photographs within and any related

1  
2  
3 or stand alone film submitted (the Contribution”) has the right to grant on behalf of all  
4 authors and does grant on behalf of all authors, a licence to the BMJ Publishing Group  
5 Ltd and its licencees, to permit this Contribution (if accepted) to be published in the  
6 BMJ and any other BMJ Group products and to exploit all subsidiary rights, as set out in  
7 our licence set out at: [http://www.bmj.com/about-bmj/resources-authors/forms-](http://www.bmj.com/about-bmj/resources-authors/forms-policies-and-checklists/copyright-open-access-and-permission-reuse)  
8 [policies-and-checklists/copyright-open-access-and-permission-reuse.](http://www.bmj.com/about-bmj/resources-authors/forms-policies-and-checklists/copyright-open-access-and-permission-reuse)”  
9  
10  
11  
12  
13  
14  
15  
16  
17  
18  
19  
20  
21  
22  
23  
24  
25  
26  
27  
28  
29  
30  
31  
32  
33  
34  
35  
36  
37  
38  
39  
40  
41  
42  
43  
44  
45  
46  
47  
48  
49  
50  
51  
52  
53  
54  
55  
56  
57  
58  
59  
60

For peer review only

- 1
- 2
- 3 1. Radford L, Corral S, Bradley C, Fisher H, Bassett C, Howat N, et al. *Child abuse and neglect in the*
- 4 *UK today*. London: NSPCC, 2011.
- 5 2. Gilbert R, Kemp A, Thoburn J, Sidebotham P, Radford L, Glaser D, et al. Recognising and
- 6 responding to child maltreatment. *Lancet* 2009;373(9658):167-80.
- 7 3. HM Government. Working together to safeguard children: a guide to inter-agency working to
- 8 safeguarding and promoting the welfare of children, 2013.
- 9 4. Gilbert R, Widom CS, Browne K, Fergusson D, Webb E, Janson S. Burden and consequences of child
- 10 maltreatment in high-income countries. *Lancet* 2009;373(9657):68-81.
- 11 5. Woodman J, Freemantle N, Allister J, de Lusignan S, Gilbert R, Petersen I. Variation in recorded
- 12 child maltreatment concerns in UK primary care records: a cohort study using The Health
- 13 Improvement Network (THIN) database. *PLOS ONE* 2012;7(11):1-9.
- 14 6. Woodman J, Allister J, Rafi I, de Lusignan S, Belsey J, Petersen I, et al. Simple approaches to
- 15 improve recording of concerns about child maltreatment in primary care records: developing
- 16 a quality improvement intervention. *Br J Gen Pract* 2012;62(600):e478-e86(9).
- 17 7. Daniel B, Taylor J, Scott J. Noticing and helping the neglected child. London, 2009.
- 18 8. Brandon MA M, Lewis BA A, Thoburn LittD J. The Children Act definition of 'significant harm'—
- 19 interpretations in practice. *Health & Social Care in the Community* 1996;4(1):11-20.
- 20 9. Holmes L, McDermid S, Soper J, Sempik J, Ward H. Extension of the cost calculator to include cost
- 21 calculations for all Children in Need. A report to Department for Education. . Loughborough,
- 22 2010.
- 23 10. Broadhurst K, Wastell D, White S, Hall C, Peckover S, Thompson K, et al. Performing 'initial
- 24 assessment': identifying the latent conditions for error at the front-door of local authority
- 25 children's services. *Brit J Soc Work* 2010;40(2):352-70.
- 26 11. National Society for the Prevention of Cruelty to Children, Royal College of General Practitioners.
- 27 Safeguarding children and young people: A toolkit for general practice. London: RCGP, 2011.
- 28 12. National Institute for Health and Clinical Excellence. *When to suspect maltreatment*. London:
- 29 NICE, 2009.
- 30 13. General Medical Council. *Protecting children and young people: the responsibilities of all doctors*.
- 31 London: GMC, 2012.
- 32 14. Daniel B, Taylor J, Scott J. Recognition of neglect and early response: overview of a systematic
- 33 review of the literature. *Child Fam Soc Work* 2010;15(2):248-57.
- 34 15. Simpson CM, Simpson RJ, Power KG, Salter A, Williams GJ. GPs' and health visitors' participation
- 35 in child protection case conferences. *Child Abuse Review* 1994;3(3):211-30.
- 36 16. Polnay JC. General practitioners and child protection case conference participation: reasons for
- 37 non-attendance and proposals for a way forward. *Child Abuse Review* 2000;9(2):108-23.
- 38 17. Lykke K, Christensen P, Reventlow S. The consultation as an interpretive dialogue about the
- 39 child's health needs. *Fam Pract* 2011;0:1-7.
- 40 18. Lykke K, Christensen P, Reventlow S. "This is not normal ... "--signs that make the GP question
- 41 the child's well-being. *Fam Pract* 2008;25(3):146-53.
- 42 19. Hølge-Hazelton B, Tulinius C. Beyond the specific child What is 'a child's case' in general practice?
- 43 *Br J Gen Pract* 2010;60(570):e4.
- 44 20. Tompsett H, Ashworth M, Atkins C, Bell L, Gallagher A, Morgan M, et al. *The child, the family and*
- 45 *the GP: tensions and conflicts of interest for GPs in safeguarding children May 2006-October*
- 46 *2008 Final report February 2010*. London: Kingston University, 2010.
- 47 21. Pope C, Mays N. Reaching the parts other methods cannot reach: an introduction to qualitative
- 48 methods in health and health services research. *BMJ* 1995;311(6996):42.
- 49 22. Green J, Thorogood N. *Qualitative methods for health research*. 2nd Edition ed: Sage Publications
- 50 Ltd, 2009.
- 51 23. Liamputtong Rice P, Ezzy D. *Qualitative research methods: A health focus*. Victoria, Australia:
- 52 Oxford University Press, 1999.
- 53
- 54
- 55
- 56
- 57
- 58
- 59
- 60

- 1
- 2
- 3 24. West P. The status and validity of accounts obtained at interview: A contrast between two
- 4 studies of families with a disabled child. *Soc Soc Med* 1990;30(11):1229-39.
- 5 25. Braun V, Clarke V. Using thematic analysis in psychology. *Qualitative research in psychology*
- 6 2006;3(2):77-101.
- 7 26. Popay J, Kowarzik U, Mallinson S, Mackian S, Barker J. Social problems, primary care and
- 8 pathways to help and support: addressing health inequalities at the individual level. Part I:
- 9 the GP perspective. *J Epidemiol Community Health* 2007;61(11):966-71.
- 10 27. O'Dowd TC. Five years of heartsink patients in general practice. *BMJ* 1988;297(6647):528-30.
- 11 28. Butler CC, Evans M. The 'heartsink' patient revisited. The Welsh Philosophy And General Practice
- 12 discussion Group. *Br J Gen Pract* 1999;49(440):230-3.
- 13 29. Sheaff R, Boaden R, Sargent P, Pickard S, Gravelle H, Parker S, et al. Impacts of case management
- 14 for frail elderly people: a qualitative study. *J Health Serv Res Policy* 2009;14(2):88-95.
- 15 30. Hanks H, Veitch C, Harris M. Colorectal cancer management - the role of the GP. *Aust Fam*
- 16 *Physician* 2008;37(4):259-61.
- 17 31. Lester H, Khan N, Jones P, Marshall M, Fowler D, Amos T, et al. Service users' views of moving on
- 18 from early intervention services for psychosis: a longitudinal qualitative study in primary
- 19 care. *Br J Gen Pract* 2012;62(596):e183-90.
- 20 32. Popay J, Kowarzik U, Mallinson S, Mackian S, Barker J. Social problems, primary care and
- 21 pathways to help and support: addressing health inequalities at the individual level. Part II:
- 22 lay perspectives. *Journal of Epidemiology and Community Health* 2007;61(11):972-77.
- 23 33. Greenhalgh T, Robb N, Scambler G. Communicative and strategic action in interpreted
- 24 consultations in primary health care: a Habermasian perspective. *Soc Sci Med*
- 25 2006;63(5):1170-87.
- 26 34. Blakeman T, Bower P, Reeves D, Chew-Graham C. Bringing self-management into clinical view: a
- 27 qualitative study of long-term condition management in primary care consultations. *Chronic*
- 28 *Illn* 2010;6(2):136-50.
- 29 35. Stott NC, Davis RH. The exceptional potential in each primary care consultation. *J R Coll Gen*
- 30 *Pract.* 1979;29(201):201-5.
- 31 36. Cocksedge S, Greenfield R, Nugent GK, Chew-Graham C. Holding relationships in primary care: a
- 32 qualitative exploration of doctors' and patients' perceptions. *Br J Gen Pract*
- 33 2011;61(589):e484-91.
- 34 37. Chew-Graham CA, May CR, Roland MO. The harmful consequences of elevating the doctor-
- 35 patient relationship to be a primary goal of the general practice consultation. *Fam Pract*
- 36 2004;21(3):229-31.
- 37 38. Brandon M. Understanding Serious Case Reviews and their Impact: A biennial analysis of serious
- 38 case reviews 2005-07. London, 2009.
- 39 39. Boddy J, Statham J, Warwick I, Hollingworth K, Spencer G. Health Related Work in Family
- 40 Intervention Projects. London, 2012.
- 41 40. Biddle L, Donovan JL, Gunnell D, Sharp D. Young adults' perceptions of GPs as a help source for
- 42 mental distress: a qualitative study. *Br J Gen Pract* 2006;56(533):924.
- 43 41. Tait L. To disclose or not to disclose psychological problems to GPs. *Br J Gen Pract*
- 44 2009;59(566):638.
- 45 42. Canvin K, Jones C, Marttila A, Burstrom B, Whitehead M. Can I risk using public services?
- 46 Perceived consequences of seeking help and health care among households living in
- 47 poverty: qualitative study. *J Epidemiol Community Health* 2007;61(11):984-9.
- 48
- 49
- 50
- 51
- 52
- 53
- 54
- 55
- 56
- 57
- 58
- 59
- 60



1  
2  
3  
4  
5  
6  
7  
8  
9  
10  
11  
12  
13  
14  
15  
16  
17  
18  
19  
20  
21  
22  
23  
24  
25  
26  
27  
28  
29  
30  
31  
32  
33  
34  
35  
36  
37  
38  
39  
40  
41  
42  
43  
44  
45  
46  
47  
48  
49  
50  
51  
52  
53  
54  
55  
56  
57  
58  
59  
60

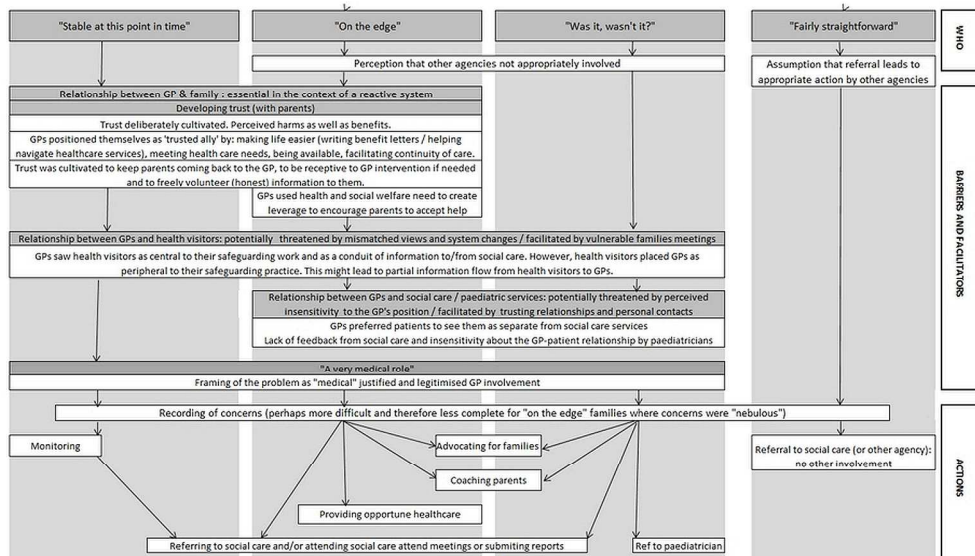

245x158mm (300 x 300 DPI)

Review only
